# Supplementary material for: A novel strategy to target metabolic dependencies in acute myeloid leukemia
Source: Springer Nature journal article supplement (doi:10.1038/s41419-025-08129-3), 2025-11-04

Corresponding to Figure 2e

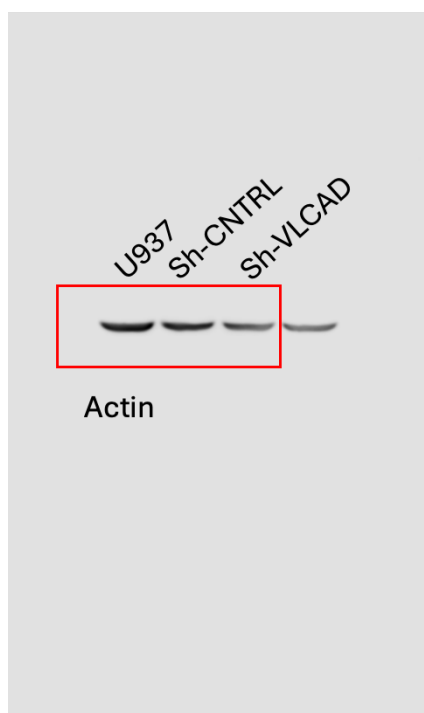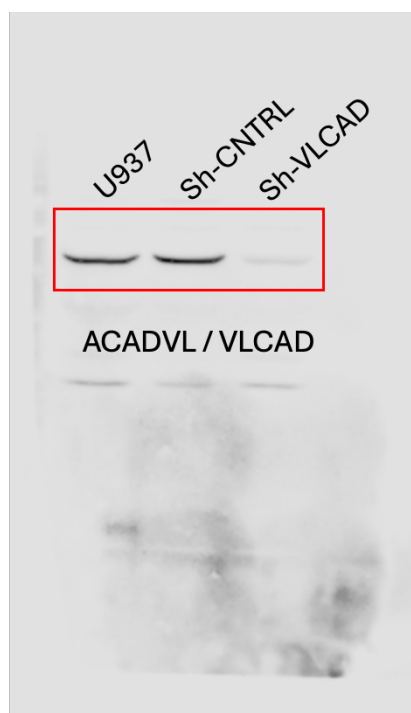

Corresponding to Figure 5c

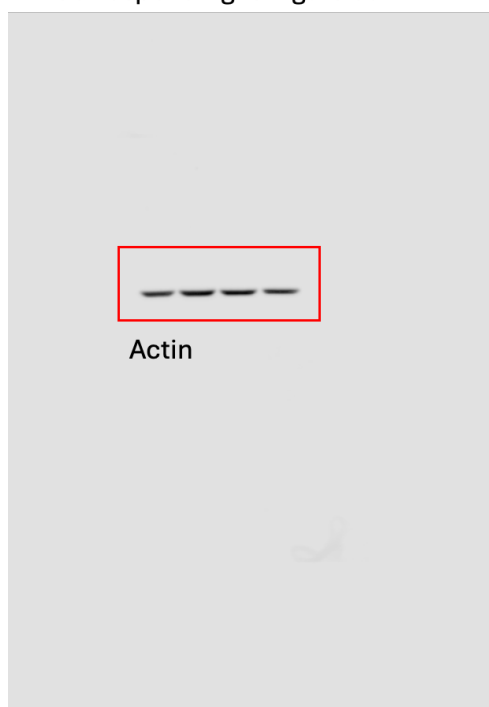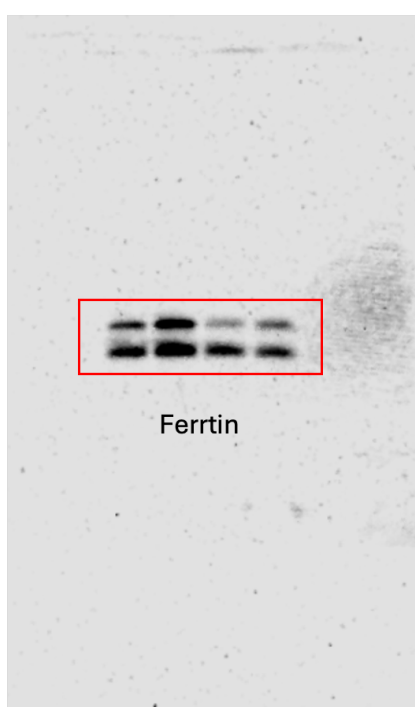

Corresponding to supplementary figure 1c

Caspase-3

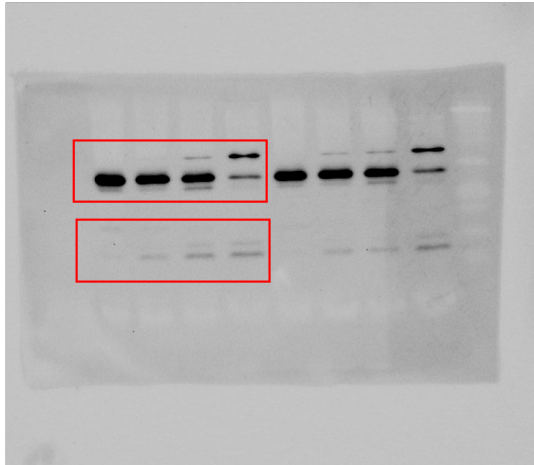

Actin

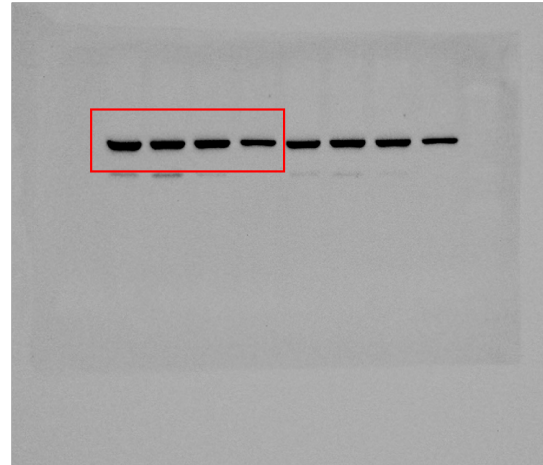

Supplement: MOESM2 [file 41419_2025_8129_MOESM2_ESM.pdf]
