# Supplementary material for: A novel strategy to target metabolic dependencies in acute myeloid leukemia
Source: Cell Death Dis. 2025 Nov 4;16(1):792. doi: 10.1038/s41419-025-08129-3 (PMC12586699; doi:10.1038/s41419-025-08129-3)
Supplement: Supplementary file 4 — Supplementary 3_DMSO_ART Metabolomics data [file 41419_2025_8129_MOESM4_ESM.xlsx]

## Sheet: Sheet1
PiMP
Compound id	Peak ID	Name	Formula	UC_1.mzXML	UC_2.mzXML	UC_3.mzXML	UR_1.mzXML	UR_2.mzXML	UR_3.mzXML	Identification
9884678	1	Glycerophosphocholine	C8H20NO6P	31395890	56200952	42794968	16672547	49518144	48237456	annotated
9884701	1	sn-glycero-3-Phosphocholine	C8H20NO6P	31395890	56200952	42794968	16672547	49518144	48237456	identified
9884705	5	Aspartyl-Glutamine	C9H15N3O6	20149.8	0	0	0	20052.5	0	annotated
9884706	5	Aspartyl-Gamma-glutamate	C9H15N3O6	20149.8	0	0	0	20052.5	0	annotated
9884708	5	Gamma-glutamyl-Aspartate	C9H15N3O6	20149.8	0	0	0	20052.5	0	annotated
9884713	7	Oxonantenine	C19H13NO5	58412.2	61392.4	48100.1	39136.3	68129.4	61948.6	annotated
9884714	7	(+)-Luguine	C19H13NO5	58412.2	61392.4	48100.1	39136.3	68129.4	61948.6	annotated
9884725	10	Albendazole	C12H15N3O2S	0	0	0	0	0	0	annotated
9884726	11	Cinnamyl benzoate	C16H14O2	91864968	188140688	171455904	86026088	168954192	175207408	annotated
9884727	11	Benzyl cinnamate	C16H14O2	91864968	188140688	171455904	86026088	168954192	175207408	annotated
9884728	11	HEPES	C8H18N2O4S	91864968	188140688	171455904	86026088	168954192	175207408	identified
9884729	11	4'-Methoxychalcone	C16H14O2	91864968	188140688	171455904	86026088	168954192	175207408	annotated
9884733	17	Nicardipine	C26H29N3O6	64263.5	112576	129445	37993.2	117673	132489	annotated
9884735	18	3'-Amino-3'-deoxythimidine	C10H15N3O4	70152.5	139950	128661	61877	114350	116518	annotated
9884736	18	5-Methyldeoxycytidine	C10H15N3O4	70152.5	139950	128661	61877	114350	116518	annotated
9884739	18	5-Methyl-2'-deoxycytidine	C10H15N3O4	70152.5	139950	128661	61877	114350	116518	annotated
9884740	19	Fenoprofen	C15H14O3	18097.2	34785.9	32921.5	15978.4	39489.6	54804.1	annotated
9884741	19	Phenethyl salicylate	C15H14O3	18097.2	34785.9	32921.5	15978.4	39489.6	54804.1	annotated
9884742	19	Citrubuntin	C15H14O3	18097.2	34785.9	32921.5	15978.4	39489.6	54804.1	annotated
9884743	19	1-Phenyl-6,7-dihydroxy-isochroman	C15H14O3	18097.2	34785.9	32921.5	15978.4	39489.6	54804.1	annotated
9884744	19	2,3-Dihydroxy-1,3-diphenyl-1-propanone	C15H14O3	18097.2	34785.9	32921.5	15978.4	39489.6	54804.1	annotated
9884745	19	Equol	C15H14O3	18097.2	34785.9	32921.5	15978.4	39489.6	54804.1	annotated
9884746	19	Guaicyl phenylacetate	C15H14O3	18097.2	34785.9	32921.5	15978.4	39489.6	54804.1	annotated
9884747	19	7,4'-Dihydroxyflavan	C15H14O3	18097.2	34785.9	32921.5	15978.4	39489.6	54804.1	annotated
9884748	19	3-Methoxy-4',5-dihydroxy-trans-stilbene	C15H14O3	18097.2	34785.9	32921.5	15978.4	39489.6	54804.1	annotated
9884749	19	4,7-Dihydroxy-2-methoxy-9,10-dihydrophenanthrene	C15H14O3	18097.2	34785.9	32921.5	15978.4	39489.6	54804.1	annotated
9884750	19	Hircinol	C15H14O3	18097.2	34785.9	32921.5	15978.4	39489.6	54804.1	annotated
9884751	19	Lapachol	C15H14O3	18097.2	34785.9	32921.5	15978.4	39489.6	54804.1	annotated
9884752	19	beta-Lapachone	C15H14O3	18097.2	34785.9	32921.5	15978.4	39489.6	54804.1	annotated
9884753	19	Dunnione	C15H14O3	18097.2	34785.9	32921.5	15978.4	39489.6	54804.1	annotated
9884754	19	4,5-Bisphenol-o-quinone	C15H14O3	18097.2	34785.9	32921.5	15978.4	39489.6	54804.1	annotated
9884755	19	Equol	C15H14O3	18097.2	34785.9	32921.5	15978.4	39489.6	54804.1	annotated
9884756	19	2',4'-Dihydroxydihydrochalcone	C15H14O3	18097.2	34785.9	32921.5	15978.4	39489.6	54804.1	annotated
9884776	20	Choline phosphate	C5H14NO4P	98882800	186769168	173710768	78968432	139727136	134192888	identified
9884777	21	7-beta-D-Glucopyranosyloxybutylidenephthalide	C18H22O8	16715109	31901672	32328948	15253792	23746240	21976050	annotated
9884778	21	1alpha,5alpha-Epidithio-17a-oxa-D-homoandrostan-3,17-dione	C19H26O3S2	16715109	31901672	32328948	15253792	23746240	21976050	annotated
9884783	23	Phosphocreatine	C4H10N3O5P	381655	1.0241e+06	1.16887e+06	21698.6	431686	510933	annotated
9884821	27	alpha-Hydrojuglone 4-O-b-D-glucoside	C16H18O8	40217.1	59037.6	71087.8	30204.8	54969.9	54780.2	annotated
9884822	27	3-O-p-Coumaroylquinic acid	C16H18O8	40217.1	59037.6	71087.8	30204.8	54969.9	54780.2	annotated
9884823	27	Hydrojuglone glucoside	C16H18O8	40217.1	59037.6	71087.8	30204.8	54969.9	54780.2	annotated
9884824	27	1-Caffeoyl-4-deoxyquinic acid	C16H18O8	40217.1	59037.6	71087.8	30204.8	54969.9	54780.2	annotated
9884825	27	4-p-Coumaroylquinic acid	C16H18O8	40217.1	59037.6	71087.8	30204.8	54969.9	54780.2	annotated
9884826	27	p-Coumaroyl quinic acid	C16H18O8	40217.1	59037.6	71087.8	30204.8	54969.9	54780.2	annotated
9884833	31	Eremopetasitenin C2	C25H34O7S	344408	687083	676460	304179	635742	760826	annotated
9884834	31	Eremopetasitenin D2	C25H34O7S	344408	687083	676460	304179	635742	760826	annotated
9884836	33	Pterolactam	C5H9NO2	16422848	23395326	19339724	8.30209e+06	19337496	18415522	annotated+fragment
9884837	33	L-Proline	C5H9NO2	16422848	23395326	19339724	8.30209e+06	19337496	18415522	identified+fragment
9884839	33	4-Amino-2-methylenebutanoic acid	C5H9NO2	16422848	23395326	19339724	8.30209e+06	19337496	18415522	annotated+fragment
9884840	33	3-Acetamidopropanal	C5H9NO2	16422848	23395326	19339724	8.30209e+06	19337496	18415522	annotated+fragment
9884845	33	D-Proline	C5H9NO2	16422848	23395326	19339724	8.30209e+06	19337496	18415522	annotated+fragment
9884849	33	Proline	C5H9NO2	16422848	23395326	19339724	8.30209e+06	19337496	18415522	annotated+fragment
9884851	34	3-Dehydroxycarnitine	C7H15NO2	419349	547732	537183	290112	360353	302853	annotated+fragment
9884852	34	2-amino-heptanoic acid	C7H15NO2	419349	547732	537183	290112	360353	302853	annotated+fragment
9884853	34	2R-aminoheptanoic acid	C7H15NO2	419349	547732	537183	290112	360353	302853	annotated+fragment
9884854	34	2S-aminoheptanoic acid	C7H15NO2	419349	547732	537183	290112	360353	302853	annotated+fragment
9884855	34	4-Trimethylammoniobutanoate	C7H15NO2	419349	547732	537183	290112	360353	302853	identified+fragment
9884856	36	Gingerenone C	C20H22O4	33465.6	36161	33867	15717	31303.6	27313.8	annotated
9884857	36	5,5-Diisopropyl-2,2'-dimethylbiphenyl-3,3',4,4'-tetrone	C20H22O4	33465.6	36161	33867	15717	31303.6	27313.8	annotated
9884858	36	1,2-Dihydrodehydroguaiaretic acid	C20H22O4	33465.6	36161	33867	15717	31303.6	27313.8	annotated
9884859	36	(+)-Galeon	C20H22O4	33465.6	36161	33867	15717	31303.6	27313.8	annotated
9884860	36	1-(4-Hydroxy-3-methoxyphenyl)-7-phenyl-3,5-heptanedione	C20H22O4	33465.6	36161	33867	15717	31303.6	27313.8	annotated
9884861	36	Licarin A	C20H22O4	33465.6	36161	33867	15717	31303.6	27313.8	annotated
9884862	36	Dehydrodieugenol	C20H22O4	33465.6	36161	33867	15717	31303.6	27313.8	annotated
9884863	36	Uncinatone	C20H22O4	33465.6	36161	33867	15717	31303.6	27313.8	annotated
9884864	36	8-(3,3-Dimethylallyl)spatheliachromene	C20H22O4	33465.6	36161	33867	15717	31303.6	27313.8	annotated
9884865	36	Pulverochromenol	C20H22O4	33465.6	36161	33867	15717	31303.6	27313.8	annotated
9884866	36	Cyclomillinol	C20H22O4	33465.6	36161	33867	15717	31303.6	27313.8	annotated
9884867	36	Broussinol	C20H22O4	33465.6	36161	33867	15717	31303.6	27313.8	annotated
9884868	36	(+)-Acutifolin A	C20H22O4	33465.6	36161	33867	15717	31303.6	27313.8	annotated
9884869	36	2',4',6'-Trihydroxy-3'-prenyldihydrochalcone	C20H22O4	33465.6	36161	33867	15717	31303.6	27313.8	annotated
9884870	36	2',6'-Dihydroxy-4'-prenyloxydihydrochalcone	C20H22O4	33465.6	36161	33867	15717	31303.6	27313.8	annotated
9884871	37	Hydroxyprolyl-Valine	C10H18N2O4	7772.46	9227.37	9201.71	2594.87	9938.89	13143.7	annotated
9884872	37	Valyl-Hydroxyproline	C10H18N2O4	7772.46	9227.37	9201.71	2594.87	9938.89	13143.7	annotated
9884880	39	Creatine	C4H9N3O2	27398210	35194936	21302114	23271982	21074840	16010657	annotated+fragment
9884881	39	3-Guanidinopropanoate	C4H9N3O2	27398210	35194936	21302114	23271982	21074840	16010657	annotated+fragment
9884890	41	Phenisopham	C19H22N2O4	29210.4	32797	27211.4	17342.9	25572.3	17417	annotated
9884901	42	Glutathione	C10H17N3O6S	4638536	8905753	10161236	3.96082e+06	7.96609e+06	8127285	annotated+fragment
9884903	42	Hallacridone	C18H13NO4	4638536	8905753	10161236	3.96082e+06	7.96609e+06	8127285	annotated+fragment
9884904	42	Aristolodione	C18H13NO4	4638536	8905753	10161236	3.96082e+06	7.96609e+06	8127285	annotated+fragment
9884906	42	Stealthin C	C18H13NO4	4638536	8905753	10161236	3.96082e+06	7.96609e+06	8127285	annotated+fragment
9884910	43	Kaempferol 3-(4''-acetyl-6''-p-coumarylglucoside)	C32H28O14	123581	170720	178071	94729.3	189018	191004	annotated
9884911	43	Kaempferol 3-(2''-(E)-p-coumaroyl-6''-acetylglucoside)	C32H28O14	123581	170720	178071	94729.3	189018	191004	annotated
9884912	43	Kaempferol 3-(3''-acetyl-6''-p-coumaroylglucoside)	C32H28O14	123581	170720	178071	94729.3	189018	191004	annotated
9884920	48	PE(22:1(13Z)/15:0)	C42H82NO8P	6902854	8.36118e+06	7967639	5856439	8272555	6.89801e+06	annotated
9884921	48	PE(15:0/22:1(13Z))	C42H82NO8P	6902854	8.36118e+06	7967639	5856439	8272555	6.89801e+06	annotated
9884932	48	PC(16:1(9Z)/18:0)	C42H82NO8P	6902854	8.36118e+06	7967639	5856439	8272555	6.89801e+06	annotated
9884933	48	PC(18:0/16:1(9Z))	C42H82NO8P	6902854	8.36118e+06	7967639	5856439	8272555	6.89801e+06	annotated
9884934	48	PC(18:1(11Z)/16:0)	C42H82NO8P	6902854	8.36118e+06	7967639	5856439	8272555	6.89801e+06	annotated
9884935	48	PC(18:1(9Z)/16:0)	C42H82NO8P	6902854	8.36118e+06	7967639	5856439	8272555	6.89801e+06	annotated
9884936	48	PC(20:1(11Z)/14:0)	C42H82NO8P	6902854	8.36118e+06	7967639	5856439	8272555	6.89801e+06	annotated
9884937	48	PC(20:0/14:1(9Z))	C42H82NO8P	6902854	8.36118e+06	7967639	5856439	8272555	6.89801e+06	annotated
9884938	48	PC(14:1(9Z)/20:0)	C42H82NO8P	6902854	8.36118e+06	7967639	5856439	8272555	6.89801e+06	annotated
9884939	48	PC(16:0/18:1(9Z))	C42H82NO8P	6902854	8.36118e+06	7967639	5856439	8272555	6.89801e+06	annotated
9884940	48	PC(16:0/18:1(11Z))	C42H82NO8P	6902854	8.36118e+06	7967639	5856439	8272555	6.89801e+06	annotated
9884951	48	PC(14:0/20:1(11Z))	C42H82NO8P	6902854	8.36118e+06	7967639	5856439	8272555	6.89801e+06	annotated
9884959	48	PC(22:1(11Z)/12:0)	C42H82NO8P	6902854	8.36118e+06	7967639	5856439	8272555	6.89801e+06	annotated
9884962	48	PE(22:1(11Z)/15:0)	C42H82NO8P	6902854	8.36118e+06	7967639	5856439	8272555	6.89801e+06	annotated
9884963	48	PE(22:0/15:1(9Z))	C42H82NO8P	6902854	8.36118e+06	7967639	5856439	8272555	6.89801e+06	annotated
9884964	48	PC(16:0/18:1(11E))	C42H82NO8P	6902854	8.36118e+06	7967639	5856439	8272555	6.89801e+06	annotated
9884965	48	PC(16:0/18:1(6Z))	C42H82NO8P	6902854	8.36118e+06	7967639	5856439	8272555	6.89801e+06	annotated
9884966	48	PC(16:0/18:1(6E))	C42H82NO8P	6902854	8.36118e+06	7967639	5856439	8272555	6.89801e+06	annotated
9884967	48	PC(16:0/18:1(9E))	C42H82NO8P	6902854	8.36118e+06	7967639	5856439	8272555	6.89801e+06	annotated
9884968	48	PC(12:0/22:1(11Z))	C42H82NO8P	6902854	8.36118e+06	7967639	5856439	8272555	6.89801e+06	annotated
9884969	48	PC(17:1(9Z)/17:0)	C42H82NO8P	6902854	8.36118e+06	7967639	5856439	8272555	6.89801e+06	annotated
9884970	48	PC(17:0/17:1(9Z))	C42H82NO8P	6902854	8.36118e+06	7967639	5856439	8272555	6.89801e+06	annotated
9884971	48	PC(15:0/19:1(9Z))	C42H82NO8P	6902854	8.36118e+06	7967639	5856439	8272555	6.89801e+06	annotated
9884972	48	PC(15:1(9Z)/19:0)	C42H82NO8P	6902854	8.36118e+06	7967639	5856439	8272555	6.89801e+06	annotated
9884973	48	PE(18:1(9Z)/19:0)	C42H82NO8P	6902854	8.36118e+06	7967639	5856439	8272555	6.89801e+06	annotated
9884974	48	PE(18:0/19:1(9Z))	C42H82NO8P	6902854	8.36118e+06	7967639	5856439	8272555	6.89801e+06	annotated
9884975	48	PE(19:0/18:1(9Z))	C42H82NO8P	6902854	8.36118e+06	7967639	5856439	8272555	6.89801e+06	annotated
9884976	48	PE(15:0/22:1(11Z))	C42H82NO8P	6902854	8.36118e+06	7967639	5856439	8272555	6.89801e+06	annotated
9884977	48	PE(16:1(9Z)/21:0)	C42H82NO8P	6902854	8.36118e+06	7967639	5856439	8272555	6.89801e+06	annotated
9884978	48	PE(17:0/20:1(11Z))	C42H82NO8P	6902854	8.36118e+06	7967639	5856439	8272555	6.89801e+06	annotated
9884979	48	PE(17:1(9Z)/20:0)	C42H82NO8P	6902854	8.36118e+06	7967639	5856439	8272555	6.89801e+06	annotated
9884980	48	PE(15:1(9Z)/22:0)	C42H82NO8P	6902854	8.36118e+06	7967639	5856439	8272555	6.89801e+06	annotated
9884981	48	PC(19:1(9Z)/15:0)	C42H82NO8P	6902854	8.36118e+06	7967639	5856439	8272555	6.89801e+06	annotated
9884982	48	PC(19:0/15:1(9Z))	C42H82NO8P	6902854	8.36118e+06	7967639	5856439	8272555	6.89801e+06	annotated
9884983	48	PE(19:1(9Z)/18:0)	C42H82NO8P	6902854	8.36118e+06	7967639	5856439	8272555	6.89801e+06	annotated
9884984	48	PE(20:0/17:1(9Z))	C42H82NO8P	6902854	8.36118e+06	7967639	5856439	8272555	6.89801e+06	annotated
9884985	48	PE(20:1(11Z)/17:0)	C42H82NO8P	6902854	8.36118e+06	7967639	5856439	8272555	6.89801e+06	annotated
9884986	48	PE(21:0/16:1(9Z))	C42H82NO8P	6902854	8.36118e+06	7967639	5856439	8272555	6.89801e+06	annotated
9884987	49	PC(24:1(15Z)/14:1(9Z))	C46H88NO8P	225862	305882	275505	224349	231919	256565	annotated
9884989	49	PC(20:2(11Z,14Z)/18:0)	C46H88NO8P	225862	305882	275505	224349	231919	256565	annotated
9884990	49	PC(20:1(11Z)/18:1(9Z))	C46H88NO8P	225862	305882	275505	224349	231919	256565	annotated
9884991	49	PC(20:1(11Z)/18:1(11Z))	C46H88NO8P	225862	305882	275505	224349	231919	256565	annotated
9884992	49	PC(22:1(13Z)/16:1(9Z))	C46H88NO8P	225862	305882	275505	224349	231919	256565	annotated
9884993	49	PC(22:2(13Z,16Z)/16:0)	C46H88NO8P	225862	305882	275505	224349	231919	256565	annotated
9884994	49	PC(16:1(9Z)/22:1(13Z))	C46H88NO8P	225862	305882	275505	224349	231919	256565	annotated
9884995	49	PC(18:0/20:2(11Z,14Z))	C46H88NO8P	225862	305882	275505	224349	231919	256565	annotated
9884996	49	PC(18:1(11Z)/20:1(11Z))	C46H88NO8P	225862	305882	275505	224349	231919	256565	annotated
9884997	49	PC(18:1(9Z)/20:1(11Z))	C46H88NO8P	225862	305882	275505	224349	231919	256565	annotated
9884998	49	PC(18:2(9Z,12Z)/20:0)	C46H88NO8P	225862	305882	275505	224349	231919	256565	annotated
9884999	49	PC(20:0/18:2(9Z,12Z))	C46H88NO8P	225862	305882	275505	224349	231919	256565	annotated
9885000	49	PC(14:1(9Z)/24:1(15Z))	C46H88NO8P	225862	305882	275505	224349	231919	256565	annotated
9885001	49	PC(16:0/22:2(13Z,16Z))	C46H88NO8P	225862	305882	275505	224349	231919	256565	annotated
9885008	49	PC(22:1(11Z)/16:1(9Z))	C46H88NO8P	225862	305882	275505	224349	231919	256565	annotated
9885011	49	PE(22:1(11Z)/19:1(9Z))	C46H88NO8P	225862	305882	275505	224349	231919	256565	annotated
9885012	49	PE(22:2(13Z,16Z)/19:0)	C46H88NO8P	225862	305882	275505	224349	231919	256565	annotated
9885013	49	PE(21:0/20:2(11Z,14Z))	C46H88NO8P	225862	305882	275505	224349	231919	256565	annotated
9885014	49	PC(18:1(11Z)/20:1(13Z))	C46H88NO8P	225862	305882	275505	224349	231919	256565	annotated
9885015	49	PC(18:0/20:2(5Z,8Z))	C46H88NO8P	225862	305882	275505	224349	231919	256565	annotated
9885016	49	PC(18:0/20:2(5Z,14Z))	C46H88NO8P	225862	305882	275505	224349	231919	256565	annotated
9885017	49	PC(18:0/20:2(8Z,14Z))	C46H88NO8P	225862	305882	275505	224349	231919	256565	annotated
9885018	49	PC(18:0/20:2(8Z,11Z))	C46H88NO8P	225862	305882	275505	224349	231919	256565	annotated
9885019	49	PC(18:0/20:2(5Z,11Z))	C46H88NO8P	225862	305882	275505	224349	231919	256565	annotated
9885020	49	PC(17:2(9Z,12Z)/21:0)	C46H88NO8P	225862	305882	275505	224349	231919	256565	annotated
9885021	49	PC(16:1(9Z)/22:1(11Z))	C46H88NO8P	225862	305882	275505	224349	231919	256565	annotated
9885022	49	PE(19:0/22:2(13Z,16Z))	C46H88NO8P	225862	305882	275505	224349	231919	256565	annotated
9885023	49	PC(19:1(9Z)/19:1(9Z))	C46H88NO8P	225862	305882	275505	224349	231919	256565	annotated
9885024	49	PE(20:2(11Z,14Z)/21:0)	C46H88NO8P	225862	305882	275505	224349	231919	256565	annotated
9885025	49	PE(19:1(9Z)/22:1(11Z))	C46H88NO8P	225862	305882	275505	224349	231919	256565	annotated
9885026	49	PC(21:0/17:2(9Z,12Z))	C46H88NO8P	225862	305882	275505	224349	231919	256565	annotated
9885027	51	PC(P-18:1(11Z)/20:1(11Z))	C46H88NO7P	30243.2	27576.8	36279.3	31460.5	46021.3	29127.3	annotated
9885028	51	PC(P-18:0/20:2(11Z,14Z))	C46H88NO7P	30243.2	27576.8	36279.3	31460.5	46021.3	29127.3	annotated
9885029	51	PC(P-16:0/22:2(13Z,16Z))	C46H88NO7P	30243.2	27576.8	36279.3	31460.5	46021.3	29127.3	annotated
9885030	51	PC(P-18:1(9Z)/20:1(11Z))	C46H88NO7P	30243.2	27576.8	36279.3	31460.5	46021.3	29127.3	annotated
9885031	51	PC(20:1(11Z)/P-18:1(9Z))	C46H88NO7P	30243.2	27576.8	36279.3	31460.5	46021.3	29127.3	annotated
9885032	51	PC(20:1(11Z)/P-18:1(11Z))	C46H88NO7P	30243.2	27576.8	36279.3	31460.5	46021.3	29127.3	annotated
9885033	51	PC(20:2(11Z,14Z)/P-18:0)	C46H88NO7P	30243.2	27576.8	36279.3	31460.5	46021.3	29127.3	annotated
9885034	51	PC(22:2(13Z,16Z)/P-16:0)	C46H88NO7P	30243.2	27576.8	36279.3	31460.5	46021.3	29127.3	annotated
9885036	51	PC(O-20:0/18:3(6Z,9Z,12Z))	C46H88NO7P	30243.2	27576.8	36279.3	31460.5	46021.3	29127.3	annotated
9885037	51	PC(O-20:0/18:3(9Z,12Z,15Z))	C46H88NO7P	30243.2	27576.8	36279.3	31460.5	46021.3	29127.3	annotated
9885039	51	PC(O-18:0/20:3(8Z,11Z,14Z))	C46H88NO7P	30243.2	27576.8	36279.3	31460.5	46021.3	29127.3	annotated
9885042	51	PC(P-16:0/22:2(13Z,16Z))	C46H88NO7P	30243.2	27576.8	36279.3	31460.5	46021.3	29127.3	annotated
9885043	51	PC(P-20:0/18:2(9Z,12Z))	C46H88NO7P	30243.2	27576.8	36279.3	31460.5	46021.3	29127.3	annotated
9885044	51	PC(P-18:0/20:2(11Z,14Z))	C46H88NO7P	30243.2	27576.8	36279.3	31460.5	46021.3	29127.3	annotated
9885047	52	PC(P-18:0/20:0)	C46H92NO7P	27962.3	34970.2	23146.7	21305	21044.7	14981.3	annotated
9885048	52	PC(P-16:0/22:0)	C46H92NO7P	27962.3	34970.2	23146.7	21305	21044.7	14981.3	annotated
9885049	52	PC(22:0/P-16:0)	C46H92NO7P	27962.3	34970.2	23146.7	21305	21044.7	14981.3	annotated
9885050	52	PC(20:0/P-18:0)	C46H92NO7P	27962.3	34970.2	23146.7	21305	21044.7	14981.3	annotated
9885051	52	PC(o-16:1(9Z)/22:0)	C46H92NO7P	27962.3	34970.2	23146.7	21305	21044.7	14981.3	annotated
9885052	52	PC(O-18:1(9Z)/20:0)	C46H92NO7P	27962.3	34970.2	23146.7	21305	21044.7	14981.3	annotated
9885054	52	PC(O-20:0/18:1(9Z))	C46H92NO7P	27962.3	34970.2	23146.7	21305	21044.7	14981.3	annotated
9885055	52	PC(O-18:0/20:1(11Z))	C46H92NO7P	27962.3	34970.2	23146.7	21305	21044.7	14981.3	annotated
9885056	52	PC(O-16:0/22:1(11Z))	C46H92NO7P	27962.3	34970.2	23146.7	21305	21044.7	14981.3	annotated
9885057	52	PC(O-18:0/20:1(9Z))	C46H92NO7P	27962.3	34970.2	23146.7	21305	21044.7	14981.3	annotated
9885058	52	PE(P-20:0/21:0)	C46H92NO7P	27962.3	34970.2	23146.7	21305	21044.7	14981.3	annotated
9885059	52	PC(P-20:0/18:0)	C46H92NO7P	27962.3	34970.2	23146.7	21305	21044.7	14981.3	annotated
9885061	53	Betaine	C5H11NO2	5192545	10497006	8804228	3609029	8129598	4724919	identified+fragment
9885063	53	Amyl nitrite	C5H11NO2	5192545	10497006	8804228	3609029	8129598	4724919	annotated+fragment
9885064	53	Amyl Nitrite	C5H11NO2	5192545	10497006	8804228	3609029	8129598	4724919	annotated+fragment
9885065	53	N-Methyl-a-aminoisobutyric acid	C5H11NO2	5192545	10497006	8804228	3609029	8129598	4724919	annotated+fragment
9885067	53	D-Norvaline	C5H11NO2	5192545	10497006	8804228	3609029	8129598	4724919	annotated+fragment
9885068	53	5-amino-pentanoic acid	C5H11NO2	5192545	10497006	8804228	3609029	8129598	4724919	annotated+fragment
9885069	53	D-Valine	C5H11NO2	5192545	10497006	8804228	3609029	8129598	4724919	annotated+fragment
9885071	53	2S-amino-pentanoic acid	C5H11NO2	5192545	10497006	8804228	3609029	8129598	4724919	annotated+fragment
9885072	53	4-Methylaminobutyrate	C5H11NO2	5192545	10497006	8804228	3609029	8129598	4724919	annotated+fragment
9885073	53	2-Amino-2-methylbutanoate	C5H11NO2	5192545	10497006	8804228	3609029	8129598	4724919	annotated+fragment
9885075	53	2-Amino-3-methylbutanoic acid	C5H11NO2	5192545	10497006	8804228	3609029	8129598	4724919	annotated+fragment
9885076	53	4S-aminopentanoic acid	C5H11NO2	5192545	10497006	8804228	3609029	8129598	4724919	annotated+fragment
9885077	53	4-amino-pentanoic acid	C5H11NO2	5192545	10497006	8804228	3609029	8129598	4724919	annotated+fragment
9885078	53	4R-aminopentanoic acid	C5H11NO2	5192545	10497006	8804228	3609029	8129598	4724919	annotated+fragment
9885079	54	N-Alpha-acetyllysine	C8H16N2O3	17690.4	44654.1	28879.8	17102.9	37566.9	22232.6	annotated
9885080	54	Glycyl-leucine	C8H16N2O3	17690.4	44654.1	28879.8	17102.9	37566.9	22232.6	annotated
9885081	54	N6-Acetyl-L-lysine	C8H16N2O3	17690.4	44654.1	28879.8	17102.9	37566.9	22232.6	annotated
9885082	54	Glycyl-Isoleucine	C8H16N2O3	17690.4	44654.1	28879.8	17102.9	37566.9	22232.6	annotated
9885083	54	Isoleucyl-Glycine	C8H16N2O3	17690.4	44654.1	28879.8	17102.9	37566.9	22232.6	annotated
9885084	54	Leucyl-Glycine	C8H16N2O3	17690.4	44654.1	28879.8	17102.9	37566.9	22232.6	annotated
9885085	54	Alanyl-Valine	C8H16N2O3	17690.4	44654.1	28879.8	17102.9	37566.9	22232.6	annotated
9885087	54	Valyl-Alanine	C8H16N2O3	17690.4	44654.1	28879.8	17102.9	37566.9	22232.6	annotated
9885093	54	6-Acetamido-3-aminohexanoate	C8H16N2O3	17690.4	44654.1	28879.8	17102.9	37566.9	22232.6	annotated
9885095	55	Glycylproline	C7H12N2O3	3671.11	35655.5	21142	2135.72	5872.82	4805.43	annotated
9885100	55	L-prolyl-L-glycine	C7H12N2O3	3671.11	35655.5	21142	2135.72	5872.82	4805.43	annotated
9885120	58	apo-[3-methylcrotonoyl-CoA:carbon-dioxide ligase (ADP-forming)]	C7H15N3O2	5519.59	14679.7	13380	5483.86	11697.5	8367.09	annotated
9885123	58	Indospicine	C7H15N3O2	5519.59	14679.7	13380	5483.86	11697.5	8367.09	annotated
9885125	59	Isogingerenone B	C22H26O6	9681671	8456231	8.38099e+06	10109109	9150810	8657779	annotated
9885126	59	Gingerenone B	C22H26O6	9681671	8456231	8.38099e+06	10109109	9150810	8657779	annotated
9885127	59	Porson	C22H26O6	9681671	8456231	8.38099e+06	10109109	9150810	8657779	annotated
9885128	59	Burseran	C22H26O6	9681671	8456231	8.38099e+06	10109109	9150810	8657779	annotated
9885129	59	(+)-Eudesmin	C22H26O6	9681671	8456231	8.38099e+06	10109109	9150810	8657779	annotated
9885130	59	4,5-Di-O-methyl-8-prenylafzelechin-4beta-ol	C22H26O6	9681671	8456231	8.38099e+06	10109109	9150810	8657779	annotated
9885131	59	3,5-Di-O-methyl-8-prenylafzelechin-4beta-ol	C22H26O6	9681671	8456231	8.38099e+06	10109109	9150810	8657779	annotated
9885143	66	PE-Cer(d16:2(4E,6E)/21:0)	C39H77N2O6P	97163.1	126775	136768	112965	109405	105323	annotated
9885144	66	PE-Cer(d15:2(4E,6E)/22:0)	C39H77N2O6P	97163.1	126775	136768	112965	109405	105323	annotated
9885145	66	PE-Cer(d14:2(4E,6E)/23:0)	C39H77N2O6P	97163.1	126775	136768	112965	109405	105323	annotated
9885146	66	SM(d18:2/16:0)	C39H77N2O6P	97163.1	126775	136768	112965	109405	105323	annotated
9885147	66	SM(d18:1/16:1)	C39H77N2O6P	97163.1	126775	136768	112965	109405	105323	annotated
9885148	66	SM(d16:1/18:1)	C39H77N2O6P	97163.1	126775	136768	112965	109405	105323	annotated
9885216	78	PE-Cer(d16:1(4E)/20:0)	C38H77N2O6P	46515.6	46440.8	52915.8	42952.6	49529.3	45312.3	annotated
9885217	78	PE-Cer(d14:1(4E)/22:0)	C38H77N2O6P	46515.6	46440.8	52915.8	42952.6	49529.3	45312.3	annotated
9885218	78	SM(d18:1/15:0)	C38H77N2O6P	46515.6	46440.8	52915.8	42952.6	49529.3	45312.3	annotated
9885219	78	SM(d16:1/17:0)	C38H77N2O6P	46515.6	46440.8	52915.8	42952.6	49529.3	45312.3	annotated
9885220	79	SM(d18:1/18:1(9Z))	C41H81N2O6P	40510.3	36879.3	47258.4	44379.1	39428.4	44495.9	annotated
9885221	79	SM(d18:1/18:1(11Z))	C41H81N2O6P	40510.3	36879.3	47258.4	44379.1	39428.4	44495.9	annotated
9885222	79	PE-Cer(d16:2(4E,6E)/23:0)	C41H81N2O6P	40510.3	36879.3	47258.4	44379.1	39428.4	44495.9	annotated
9885223	79	PE-Cer(d15:2(4E,6E)/24:0)	C41H81N2O6P	40510.3	36879.3	47258.4	44379.1	39428.4	44495.9	annotated
9885224	79	PE-Cer(d14:2(4E,6E)/25:0)	C41H81N2O6P	40510.3	36879.3	47258.4	44379.1	39428.4	44495.9	annotated
9885225	79	SM(d18:0/18:2)	C41H81N2O6P	40510.3	36879.3	47258.4	44379.1	39428.4	44495.9	annotated
9885226	79	SM(d16:1/20:1)	C41H81N2O6P	40510.3	36879.3	47258.4	44379.1	39428.4	44495.9	annotated
9885227	79	SM(d18:2/18:0)	C41H81N2O6P	40510.3	36879.3	47258.4	44379.1	39428.4	44495.9	annotated
9885228	79	SM(d19:1/17:1)	C41H81N2O6P	40510.3	36879.3	47258.4	44379.1	39428.4	44495.9	annotated
9885241	87	trans-4-Hydroxy-L-proline	C5H9NO3	3.30908e+06	7.66237e+06	7327530	1.56408e+06	7.14859e+06	6138405	identified+fragment
9885243	87	N-Acetyl-L-alanine	C5H9NO3	3.30908e+06	7.66237e+06	7327530	1.56408e+06	7.14859e+06	6138405	annotated+fragment
9885244	87	Propionylglycine	C5H9NO3	3.30908e+06	7.66237e+06	7327530	1.56408e+06	7.14859e+06	6138405	annotated+fragment
9885246	87	4-Hydroxy-L-proline	C5H9NO3	3.30908e+06	7.66237e+06	7327530	1.56408e+06	7.14859e+06	6138405	annotated+fragment
9885247	87	trans-3-Hydroxy-L-proline	C5H9NO3	3.30908e+06	7.66237e+06	7327530	1.56408e+06	7.14859e+06	6138405	annotated+fragment
9885249	87	cis-4-Hydroxy-D-proline	C5H9NO3	3.30908e+06	7.66237e+06	7327530	1.56408e+06	7.14859e+06	6138405	annotated+fragment
9885252	87	5-amino-levulinic acid	C5H9NO3	3.30908e+06	7.66237e+06	7327530	1.56408e+06	7.14859e+06	6138405	annotated+fragment
9885254	87	N-Acetyl-beta-alanine	C5H9NO3	3.30908e+06	7.66237e+06	7327530	1.56408e+06	7.14859e+06	6138405	annotated+fragment
9885255	87	4-Hydroxy-2-pyrrolidinecarboxylic acid	C5H9NO3	3.30908e+06	7.66237e+06	7327530	1.56408e+06	7.14859e+06	6138405	annotated+fragment
9885257	87	3-Hydroxy-L-proline	C5H9NO3	3.30908e+06	7.66237e+06	7327530	1.56408e+06	7.14859e+06	6138405	annotated+fragment
9885258	87	L-Glutamate 5-semialdehyde	C5H9NO3	3.30908e+06	7.66237e+06	7327530	1.56408e+06	7.14859e+06	6138405	annotated+fragment
9885259	87	2-oxo-5-amino-pentanoic acid	C5H9NO3	3.30908e+06	7.66237e+06	7327530	1.56408e+06	7.14859e+06	6138405	annotated+fragment
9885261	87	cis-3-Hydroxy-L-proline	C5H9NO3	3.30908e+06	7.66237e+06	7327530	1.56408e+06	7.14859e+06	6138405	annotated+fragment
9885264	87	(S)-4-Amino-5-oxopentanoate	C5H9NO3	3.30908e+06	7.66237e+06	7327530	1.56408e+06	7.14859e+06	6138405	annotated+fragment
9885266	87	trans-4-Hydroxy-D-proline	C5H9NO3	3.30908e+06	7.66237e+06	7327530	1.56408e+06	7.14859e+06	6138405	annotated+fragment
9885267	87	cis-4-Hydroxy-L-proline	C5H9NO3	3.30908e+06	7.66237e+06	7327530	1.56408e+06	7.14859e+06	6138405	annotated+fragment
9885268	87	2-Amino-4-oxopentanoic acid	C5H9NO3	3.30908e+06	7.66237e+06	7327530	1.56408e+06	7.14859e+06	6138405	annotated+fragment
9885269	87	2-amino-4-oxo-pentanoic acid	C5H9NO3	3.30908e+06	7.66237e+06	7327530	1.56408e+06	7.14859e+06	6138405	annotated+fragment
9885270	88	L-2-Amino-3-(1-pyrazolyl)propanoic acid	C6H9N3O2	665355	2.05541e+06	2322381	645483	2.24994e+06	2145177	annotated+fragment
9885272	88	L-Histidine	C6H9N3O2	665355	2.05541e+06	2322381	645483	2.24994e+06	2145177	annotated+fragment
9885275	88	D-Histidine	C6H9N3O2	665355	2.05541e+06	2322381	645483	2.24994e+06	2145177	annotated+fragment
9885277	88	Histidine	C6H9N3O2	665355	2.05541e+06	2322381	645483	2.24994e+06	2145177	annotated+fragment
9885279	88	3-(Pyrazol-1-yl)-L-alanine	C6H9N3O2	665355	2.05541e+06	2322381	645483	2.24994e+06	2145177	annotated+fragment
9885280	89	5-L-Glutamyl-taurine	C7H14N2O6S	5493.87	19666.6	19595.3	2605.09	11233.4	13302.3	annotated
9885281	89	Phomarin	C15H10O4	5493.87	19666.6	19595.3	2605.09	11233.4	13302.3	annotated
9885282	89	Chrysophanol	C15H10O4	5493.87	19666.6	19595.3	2605.09	11233.4	13302.3	annotated
9885283	89	5,7-Dihydroxyisoflavone	C15H10O4	5493.87	19666.6	19595.3	2605.09	11233.4	13302.3	annotated
9885284	89	Chrysin	C15H10O4	5493.87	19666.6	19595.3	2605.09	11233.4	13302.3	annotated
9885285	89	Hispidol	C15H10O4	5493.87	19666.6	19595.3	2605.09	11233.4	13302.3	annotated
9885286	89	Daidzein	C15H10O4	5493.87	19666.6	19595.3	2605.09	11233.4	13302.3	annotated
9885287	89	Alizarin 2-methyl ether	C15H10O4	5493.87	19666.6	19595.3	2605.09	11233.4	13302.3	annotated
9885288	89	Anhydroglycinol	C15H10O4	5493.87	19666.6	19595.3	2605.09	11233.4	13302.3	annotated
9885289	89	Primetin	C15H10O4	5493.87	19666.6	19595.3	2605.09	11233.4	13302.3	annotated
9885290	89	Rubiadin	C15H10O4	5493.87	19666.6	19595.3	2605.09	11233.4	13302.3	annotated
9885291	89	1,4-Dihydroxy-2-methylanthraquinone	C15H10O4	5493.87	19666.6	19595.3	2605.09	11233.4	13302.3	annotated
9885292	89	Digiferrugineol	C15H10O4	5493.87	19666.6	19595.3	2605.09	11233.4	13302.3	annotated
9885293	89	7,4'-Dihydroxyflavone	C15H10O4	5493.87	19666.6	19595.3	2605.09	11233.4	13302.3	annotated
9885294	89	4',6-Dihydroxyflavone	C15H10O4	5493.87	19666.6	19595.3	2605.09	11233.4	13302.3	annotated
9885295	89	8,2'-Dihydroxyflavone	C15H10O4	5493.87	19666.6	19595.3	2605.09	11233.4	13302.3	annotated
9885296	89	2',5'-Dihydroxyflavone	C15H10O4	5493.87	19666.6	19595.3	2605.09	11233.4	13302.3	annotated
9885297	89	5,2'-Dihydroxyflavone	C15H10O4	5493.87	19666.6	19595.3	2605.09	11233.4	13302.3	annotated
9885298	89	Serratin	C15H10O4	5493.87	19666.6	19595.3	2605.09	11233.4	13302.3	annotated
9885299	89	Nordalbergin	C15H10O4	5493.87	19666.6	19595.3	2605.09	11233.4	13302.3	annotated
9885300	89	3,7-Dihydroxyflavone	C15H10O4	5493.87	19666.6	19595.3	2605.09	11233.4	13302.3	annotated
9885301	89	8,4'-Dihydroxyisoflavone	C15H10O4	5493.87	19666.6	19595.3	2605.09	11233.4	13302.3	annotated
9885302	89	Hispidol	C15H10O4	5493.87	19666.6	19595.3	2605.09	11233.4	13302.3	annotated
9885303	93	PC(16:0/0:0)	C24H50NO7P	654430	2.28394e+06	1771494	403961	403531	313159	annotated
9885327	93	PC(O-14:0/2:0)	C24H50NO7P	654430	2.28394e+06	1771494	403961	403531	313159	annotated
9885328	93	PC(0:0/16:0)	C24H50NO7P	654430	2.28394e+06	1771494	403961	403531	313159	annotated
9885329	93	PC(16:0/0:0)[rac]	C24H50NO7P	654430	2.28394e+06	1771494	403961	403531	313159	annotated
9885355	93	PE(19:0/0:0)	C24H50NO7P	654430	2.28394e+06	1771494	403961	403531	313159	annotated
9885369	94	PC(O-18:0/0:0)	C26H56NO6P	22896.7	53338.3	39258.6	13516.1	15890.8	12216.1	annotated
9885372	94	1-octadecylglycero-3-phosphocholine	C26H56NO6P	22896.7	53338.3	39258.6	13516.1	15890.8	12216.1	annotated
9885375	94	PC(O-16:0/O-2:0)	C26H56NO6P	22896.7	53338.3	39258.6	13516.1	15890.8	12216.1	annotated
9885378	96	LysoPC(20:3(5Z,8Z,11Z))	C28H52NO7P	11454.3	27489.9	25015.9	14248.3	10264.2	11722.7	annotated
9885379	96	PC(20:3(8Z,11Z,14Z)/0:0)	C28H52NO7P	11454.3	27489.9	25015.9	14248.3	10264.2	11722.7	annotated
9885387	99	PE(20:1(11Z)/15:0)	C40H78NO8P	5.65396e+06	8532010	8132458	4.9526e+06	6.91369e+06	5725838	annotated
9885388	99	PE-NMe(16:0/18:1(9Z))	C40H78NO8P	5.65396e+06	8532010	8132458	4.9526e+06	6.91369e+06	5725838	annotated
9885389	99	PE(15:0/20:1(11Z))	C40H78NO8P	5.65396e+06	8532010	8132458	4.9526e+06	6.91369e+06	5725838	annotated
9885417	99	PC(16:1(9Z)/16:0)	C40H78NO8P	5.65396e+06	8532010	8132458	4.9526e+06	6.91369e+06	5725838	annotated
9885418	99	PC(18:0/14:1(9Z))	C40H78NO8P	5.65396e+06	8532010	8132458	4.9526e+06	6.91369e+06	5725838	annotated
9885419	99	PC(18:1(9Z)/14:0)	C40H78NO8P	5.65396e+06	8532010	8132458	4.9526e+06	6.91369e+06	5725838	annotated
9885420	99	PC(18:1(11Z)/14:0)	C40H78NO8P	5.65396e+06	8532010	8132458	4.9526e+06	6.91369e+06	5725838	annotated
9885421	99	PC(14:1(9Z)/18:0)	C40H78NO8P	5.65396e+06	8532010	8132458	4.9526e+06	6.91369e+06	5725838	annotated
9885422	99	PC(16:0/16:1(9Z))	C40H78NO8P	5.65396e+06	8532010	8132458	4.9526e+06	6.91369e+06	5725838	annotated
9885451	99	PC(14:0/18:1(9Z))	C40H78NO8P	5.65396e+06	8532010	8132458	4.9526e+06	6.91369e+06	5725838	annotated
9885452	99	PC(14:0/18:1(11Z))	C40H78NO8P	5.65396e+06	8532010	8132458	4.9526e+06	6.91369e+06	5725838	annotated
9885465	99	PE(17:0/18:1(9Z))	C40H78NO8P	5.65396e+06	8532010	8132458	4.9526e+06	6.91369e+06	5725838	annotated
9885466	99	PE(22:1(11Z)/13:0)	C40H78NO8P	5.65396e+06	8532010	8132458	4.9526e+06	6.91369e+06	5725838	annotated
9885467	99	PC(12:0/20:1(11Z))	C40H78NO8P	5.65396e+06	8532010	8132458	4.9526e+06	6.91369e+06	5725838	annotated
9885468	99	PC(13:0/19:1(9Z))	C40H78NO8P	5.65396e+06	8532010	8132458	4.9526e+06	6.91369e+06	5725838	annotated
9885469	99	PC(17:1(9Z)/15:0)	C40H78NO8P	5.65396e+06	8532010	8132458	4.9526e+06	6.91369e+06	5725838	annotated
9885470	99	PC(17:0/15:1(9Z))	C40H78NO8P	5.65396e+06	8532010	8132458	4.9526e+06	6.91369e+06	5725838	annotated
9885471	99	PC(15:0/17:1(9Z))	C40H78NO8P	5.65396e+06	8532010	8132458	4.9526e+06	6.91369e+06	5725838	annotated
9885472	99	PC(15:1(9Z)/17:0)	C40H78NO8P	5.65396e+06	8532010	8132458	4.9526e+06	6.91369e+06	5725838	annotated
9885473	99	PE-NMe(18:1(9Z)/16:0)	C40H78NO8P	5.65396e+06	8532010	8132458	4.9526e+06	6.91369e+06	5725838	annotated
9885474	99	PE(18:1(9Z)/17:0)	C40H78NO8P	5.65396e+06	8532010	8132458	4.9526e+06	6.91369e+06	5725838	annotated
9885475	99	PE(18:0/17:1(9Z))	C40H78NO8P	5.65396e+06	8532010	8132458	4.9526e+06	6.91369e+06	5725838	annotated
9885476	99	PE(19:0/16:1(9Z))	C40H78NO8P	5.65396e+06	8532010	8132458	4.9526e+06	6.91369e+06	5725838	annotated
9885477	99	PE(19:1(9Z)/16:0)	C40H78NO8P	5.65396e+06	8532010	8132458	4.9526e+06	6.91369e+06	5725838	annotated
9885478	99	PE(15:1(9Z)/20:0)	C40H78NO8P	5.65396e+06	8532010	8132458	4.9526e+06	6.91369e+06	5725838	annotated
9885479	99	PE(13:0/22:1(11Z))	C40H78NO8P	5.65396e+06	8532010	8132458	4.9526e+06	6.91369e+06	5725838	annotated
9885480	99	PE(14:1(9Z)/21:0)	C40H78NO8P	5.65396e+06	8532010	8132458	4.9526e+06	6.91369e+06	5725838	annotated
9885481	99	PE(16:1(9Z)/19:0)	C40H78NO8P	5.65396e+06	8532010	8132458	4.9526e+06	6.91369e+06	5725838	annotated
9885482	99	PE(17:1(9Z)/18:0)	C40H78NO8P	5.65396e+06	8532010	8132458	4.9526e+06	6.91369e+06	5725838	annotated
9885483	99	PE(16:0/19:1(9Z))	C40H78NO8P	5.65396e+06	8532010	8132458	4.9526e+06	6.91369e+06	5725838	annotated
9885484	99	PC(19:1(9Z)/13:0)	C40H78NO8P	5.65396e+06	8532010	8132458	4.9526e+06	6.91369e+06	5725838	annotated
9885485	99	PE(20:0/15:1(9Z))	C40H78NO8P	5.65396e+06	8532010	8132458	4.9526e+06	6.91369e+06	5725838	annotated
9885486	99	PE(21:0/14:1(9Z))	C40H78NO8P	5.65396e+06	8532010	8132458	4.9526e+06	6.91369e+06	5725838	annotated
9885487	99	PC(20:1(11Z)/12:0)	C40H78NO8P	5.65396e+06	8532010	8132458	4.9526e+06	6.91369e+06	5725838	annotated
9885488	100	PC(20:3(8Z,11Z,14Z)/20:4(8Z,11Z,14Z,17Z))	C48H82NO8P	67121	147166	188535	93691.9	148171	136558	annotated
9885489	100	PC(20:3(8Z,11Z,14Z)/20:4(5Z,8Z,11Z,14Z))	C48H82NO8P	67121	147166	188535	93691.9	148171	136558	annotated
9885490	100	PC(20:3(5Z,8Z,11Z)/20:4(8Z,11Z,14Z,17Z))	C48H82NO8P	67121	147166	188535	93691.9	148171	136558	annotated
9885491	100	PC(20:3(5Z,8Z,11Z)/20:4(5Z,8Z,11Z,14Z))	C48H82NO8P	67121	147166	188535	93691.9	148171	136558	annotated
9885492	100	PC(20:2(11Z,14Z)/20:5(5Z,8Z,11Z,14Z,17Z))	C48H82NO8P	67121	147166	188535	93691.9	148171	136558	annotated
9885493	100	PC(20:5(5Z,8Z,11Z,14Z,17Z)/20:2(11Z,14Z))	C48H82NO8P	67121	147166	188535	93691.9	148171	136558	annotated
9885494	100	PC(20:4(5Z,8Z,11Z,14Z)/20:3(8Z,11Z,14Z))	C48H82NO8P	67121	147166	188535	93691.9	148171	136558	annotated
9885495	100	PC(20:4(5Z,8Z,11Z,14Z)/20:3(5Z,8Z,11Z))	C48H82NO8P	67121	147166	188535	93691.9	148171	136558	annotated
9885496	100	PC(20:4(8Z,11Z,14Z,17Z)/20:3(8Z,11Z,14Z))	C48H82NO8P	67121	147166	188535	93691.9	148171	136558	annotated
9885497	100	PC(20:4(8Z,11Z,14Z,17Z)/20:3(5Z,8Z,11Z))	C48H82NO8P	67121	147166	188535	93691.9	148171	136558	annotated
9885498	100	PC(22:4(7Z,10Z,13Z,16Z)/18:3(9Z,12Z,15Z))	C48H82NO8P	67121	147166	188535	93691.9	148171	136558	annotated
9885499	100	PC(22:4(7Z,10Z,13Z,16Z)/18:3(6Z,9Z,12Z))	C48H82NO8P	67121	147166	188535	93691.9	148171	136558	annotated
9885500	100	PC(22:6(4Z,7Z,10Z,13Z,16Z,19Z)/18:1(9Z))	C48H82NO8P	67121	147166	188535	93691.9	148171	136558	annotated
9885501	100	PC(22:6(4Z,7Z,10Z,13Z,16Z,19Z)/18:1(11Z))	C48H82NO8P	67121	147166	188535	93691.9	148171	136558	annotated
9885502	100	PC(22:5(7Z,10Z,13Z,16Z,19Z)/18:2(9Z,12Z))	C48H82NO8P	67121	147166	188535	93691.9	148171	136558	annotated
9885503	100	PC(22:5(4Z,7Z,10Z,13Z,16Z)/18:2(9Z,12Z))	C48H82NO8P	67121	147166	188535	93691.9	148171	136558	annotated
9885504	100	PC(18:1(11Z)/22:6(4Z,7Z,10Z,13Z,16Z,19Z))	C48H82NO8P	67121	147166	188535	93691.9	148171	136558	annotated
9885505	100	PC(18:1(9Z)/22:6(4Z,7Z,10Z,13Z,16Z,19Z))	C48H82NO8P	67121	147166	188535	93691.9	148171	136558	annotated
9885506	100	PC(18:2(9Z,12Z)/22:5(7Z,10Z,13Z,16Z,19Z))	C48H82NO8P	67121	147166	188535	93691.9	148171	136558	annotated
9885507	100	PC(18:2(9Z,12Z)/22:5(4Z,7Z,10Z,13Z,16Z))	C48H82NO8P	67121	147166	188535	93691.9	148171	136558	annotated
9885508	100	PC(18:3(6Z,9Z,12Z)/22:4(7Z,10Z,13Z,16Z))	C48H82NO8P	67121	147166	188535	93691.9	148171	136558	annotated
9885509	100	PC(18:3(9Z,12Z,15Z)/22:4(7Z,10Z,13Z,16Z))	C48H82NO8P	67121	147166	188535	93691.9	148171	136558	annotated
9885513	101	L-Carnitine	C7H15NO3	4788588	6064333	5647022	3.71485e+06	3.45498e+06	3.69901e+06	identified+fragment
9885514	101	Malonyl-Carnitin	C7H15NO3	4788588	6064333	5647022	3.71485e+06	3.45498e+06	3.69901e+06	annotated+fragment
9885515	101	(S)-Carnitine	C7H15NO3	4788588	6064333	5647022	3.71485e+06	3.45498e+06	3.69901e+06	annotated+fragment
9885583	103	PC(18:1(9Z)/18:1(9Z))	C44H84NO8P	1.34579e+06	1.74427e+06	1.5712e+06	1.29832e+06	1.49047e+06	1.42009e+06	annotated
9885587	103	PC(20:2(11Z,14Z)/16:0)	C44H84NO8P	1.34579e+06	1.74427e+06	1.5712e+06	1.29832e+06	1.49047e+06	1.42009e+06	annotated
9885588	103	PC(22:1(13Z)/14:1(9Z))	C44H84NO8P	1.34579e+06	1.74427e+06	1.5712e+06	1.29832e+06	1.49047e+06	1.42009e+06	annotated
9885589	103	PC(22:2(13Z,16Z)/14:0)	C44H84NO8P	1.34579e+06	1.74427e+06	1.5712e+06	1.29832e+06	1.49047e+06	1.42009e+06	annotated
9885590	103	PC(16:1(9Z)/20:1(11Z))	C44H84NO8P	1.34579e+06	1.74427e+06	1.5712e+06	1.29832e+06	1.49047e+06	1.42009e+06	annotated
9885591	103	PC(18:0/18:2(9Z,12Z))	C44H84NO8P	1.34579e+06	1.74427e+06	1.5712e+06	1.29832e+06	1.49047e+06	1.42009e+06	annotated
9885592	103	PC(18:1(11Z)/18:1(9Z))	C44H84NO8P	1.34579e+06	1.74427e+06	1.5712e+06	1.29832e+06	1.49047e+06	1.42009e+06	annotated
9885593	103	PC(18:1(11Z)/18:1(11Z))	C44H84NO8P	1.34579e+06	1.74427e+06	1.5712e+06	1.29832e+06	1.49047e+06	1.42009e+06	annotated
9885594	103	PC(18:2(9Z,12Z)/18:0)	C44H84NO8P	1.34579e+06	1.74427e+06	1.5712e+06	1.29832e+06	1.49047e+06	1.42009e+06	annotated
9885595	103	PC(18:1(9Z)/18:1(11Z))	C44H84NO8P	1.34579e+06	1.74427e+06	1.5712e+06	1.29832e+06	1.49047e+06	1.42009e+06	annotated
9885596	103	PC(20:1(11Z)/16:1(9Z))	C44H84NO8P	1.34579e+06	1.74427e+06	1.5712e+06	1.29832e+06	1.49047e+06	1.42009e+06	annotated
9885597	103	PC(18:1(9Z)/18:1(9Z))	C44H84NO8P	1.34579e+06	1.74427e+06	1.5712e+06	1.29832e+06	1.49047e+06	1.42009e+06	annotated
9885598	103	PC(14:1(9Z)/22:1(13Z))	C44H84NO8P	1.34579e+06	1.74427e+06	1.5712e+06	1.29832e+06	1.49047e+06	1.42009e+06	annotated
9885599	103	PC(16:0/20:2(11Z,14Z))	C44H84NO8P	1.34579e+06	1.74427e+06	1.5712e+06	1.29832e+06	1.49047e+06	1.42009e+06	annotated
9885606	103	PC(14:0/22:2(13Z,16Z))	C44H84NO8P	1.34579e+06	1.74427e+06	1.5712e+06	1.29832e+06	1.49047e+06	1.42009e+06	annotated
9885616	103	PC(22:1(11Z)/14:1(9Z))	C44H84NO8P	1.34579e+06	1.74427e+06	1.5712e+06	1.29832e+06	1.49047e+06	1.42009e+06	annotated
9885619	103	PE(22:1(11Z)/17:1(9Z))	C44H84NO8P	1.34579e+06	1.74427e+06	1.5712e+06	1.29832e+06	1.49047e+06	1.42009e+06	annotated
9885620	103	PE(22:2(13Z,16Z)/17:0)	C44H84NO8P	1.34579e+06	1.74427e+06	1.5712e+06	1.29832e+06	1.49047e+06	1.42009e+06	annotated
9885621	103	PE(21:0/18:2(9Z,12Z))	C44H84NO8P	1.34579e+06	1.74427e+06	1.5712e+06	1.29832e+06	1.49047e+06	1.42009e+06	annotated
9885622	103	PE(22:0/17:2(9Z,12Z))	C44H84NO8P	1.34579e+06	1.74427e+06	1.5712e+06	1.29832e+06	1.49047e+06	1.42009e+06	annotated
9885623	103	PC(18:1(10Z)/18:1(10Z))	C44H84NO8P	1.34579e+06	1.74427e+06	1.5712e+06	1.29832e+06	1.49047e+06	1.42009e+06	annotated
9885624	103	PC(18:1(11E)/18:1(11E))	C44H84NO8P	1.34579e+06	1.74427e+06	1.5712e+06	1.29832e+06	1.49047e+06	1.42009e+06	annotated
9885625	103	PC(18:1(12Z)/18:1(12Z))	C44H84NO8P	1.34579e+06	1.74427e+06	1.5712e+06	1.29832e+06	1.49047e+06	1.42009e+06	annotated
9885626	103	PC(18:1(7Z)/18:1(7Z))	C44H84NO8P	1.34579e+06	1.74427e+06	1.5712e+06	1.29832e+06	1.49047e+06	1.42009e+06	annotated
9885627	103	PC(18:1(9E)/18:1(9E))	C44H84NO8P	1.34579e+06	1.74427e+06	1.5712e+06	1.29832e+06	1.49047e+06	1.42009e+06	annotated
9885628	103	PC(18:1(8Z)/18:1(8Z))	C44H84NO8P	1.34579e+06	1.74427e+06	1.5712e+06	1.29832e+06	1.49047e+06	1.42009e+06	annotated
9885629	103	PC(18:1(14Z)/18:1(14Z))	C44H84NO8P	1.34579e+06	1.74427e+06	1.5712e+06	1.29832e+06	1.49047e+06	1.42009e+06	annotated
9885630	103	PC(18:1(13Z)/18:1(13Z))	C44H84NO8P	1.34579e+06	1.74427e+06	1.5712e+06	1.29832e+06	1.49047e+06	1.42009e+06	annotated
9885631	103	PC(18:1(17Z)/18:1(17Z))	C44H84NO8P	1.34579e+06	1.74427e+06	1.5712e+06	1.29832e+06	1.49047e+06	1.42009e+06	annotated
9885632	103	PC(18:1(16Z)/18:1(16Z))	C44H84NO8P	1.34579e+06	1.74427e+06	1.5712e+06	1.29832e+06	1.49047e+06	1.42009e+06	annotated
9885633	103	PC(18:1(15Z)/18:1(15Z))	C44H84NO8P	1.34579e+06	1.74427e+06	1.5712e+06	1.29832e+06	1.49047e+06	1.42009e+06	annotated
9885634	103	PC(18:1(2Z)/18:1(2Z))	C44H84NO8P	1.34579e+06	1.74427e+06	1.5712e+06	1.29832e+06	1.49047e+06	1.42009e+06	annotated
9885635	103	PC(18:1(5Z)/18:1(5Z))	C44H84NO8P	1.34579e+06	1.74427e+06	1.5712e+06	1.29832e+06	1.49047e+06	1.42009e+06	annotated
9885636	103	PC(18:1(3Z)/18:1(3Z))	C44H84NO8P	1.34579e+06	1.74427e+06	1.5712e+06	1.29832e+06	1.49047e+06	1.42009e+06	annotated
9885637	103	PC(18:1(6Z)/18:1(6Z))	C44H84NO8P	1.34579e+06	1.74427e+06	1.5712e+06	1.29832e+06	1.49047e+06	1.42009e+06	annotated
9885638	103	PC(18:1(6E)/18:1(6E))	C44H84NO8P	1.34579e+06	1.74427e+06	1.5712e+06	1.29832e+06	1.49047e+06	1.42009e+06	annotated
9885639	103	PC(18:0/18:2(6Z,9Z))	C44H84NO8P	1.34579e+06	1.74427e+06	1.5712e+06	1.29832e+06	1.49047e+06	1.42009e+06	annotated
9885640	103	PC(18:0/18:2(2E,4E))	C44H84NO8P	1.34579e+06	1.74427e+06	1.5712e+06	1.29832e+06	1.49047e+06	1.42009e+06	annotated
9885641	103	PC(18:0/18:2(10Z,12Z))	C44H84NO8P	1.34579e+06	1.74427e+06	1.5712e+06	1.29832e+06	1.49047e+06	1.42009e+06	annotated
9885642	103	PC(18:1(4Z)/18:1(4Z))	C44H84NO8P	1.34579e+06	1.74427e+06	1.5712e+06	1.29832e+06	1.49047e+06	1.42009e+06	annotated
9885643	103	PC(17:1(9Z)/19:1(9Z))	C44H84NO8P	1.34579e+06	1.74427e+06	1.5712e+06	1.29832e+06	1.49047e+06	1.42009e+06	annotated
9885644	103	PC(17:2(9Z,12Z)/19:0)	C44H84NO8P	1.34579e+06	1.74427e+06	1.5712e+06	1.29832e+06	1.49047e+06	1.42009e+06	annotated
9885645	103	PC(14:1(9Z)/22:1(11Z))	C44H84NO8P	1.34579e+06	1.74427e+06	1.5712e+06	1.29832e+06	1.49047e+06	1.42009e+06	annotated
9885646	103	PE(18:2(9Z,12Z)/21:0)	C44H84NO8P	1.34579e+06	1.74427e+06	1.5712e+06	1.29832e+06	1.49047e+06	1.42009e+06	annotated
9885647	103	PE(17:2(9Z,12Z)/22:0)	C44H84NO8P	1.34579e+06	1.74427e+06	1.5712e+06	1.29832e+06	1.49047e+06	1.42009e+06	annotated
9885648	103	PE(19:0/20:2(11Z,14Z))	C44H84NO8P	1.34579e+06	1.74427e+06	1.5712e+06	1.29832e+06	1.49047e+06	1.42009e+06	annotated
9885649	103	PE(17:0/22:2(13Z,16Z))	C44H84NO8P	1.34579e+06	1.74427e+06	1.5712e+06	1.29832e+06	1.49047e+06	1.42009e+06	annotated
9885650	103	PE(17:1(9Z)/22:1(11Z))	C44H84NO8P	1.34579e+06	1.74427e+06	1.5712e+06	1.29832e+06	1.49047e+06	1.42009e+06	annotated
9885651	103	PC(19:1(9Z)/17:1(9Z))	C44H84NO8P	1.34579e+06	1.74427e+06	1.5712e+06	1.29832e+06	1.49047e+06	1.42009e+06	annotated
9885652	103	PC(19:0/17:2(9Z,12Z))	C44H84NO8P	1.34579e+06	1.74427e+06	1.5712e+06	1.29832e+06	1.49047e+06	1.42009e+06	annotated
9885653	103	PE(20:2(11Z,14Z)/19:0)	C44H84NO8P	1.34579e+06	1.74427e+06	1.5712e+06	1.29832e+06	1.49047e+06	1.42009e+06	annotated
9885654	103	PE(19:1(9Z)/20:1(11Z))	C44H84NO8P	1.34579e+06	1.74427e+06	1.5712e+06	1.29832e+06	1.49047e+06	1.42009e+06	annotated
9885655	103	PE(20:1(11Z)/19:1(9Z))	C44H84NO8P	1.34579e+06	1.74427e+06	1.5712e+06	1.29832e+06	1.49047e+06	1.42009e+06	annotated
9885696	109	PE-NMe(18:1(9Z)/18:1(9Z))	C42H80NO8P	2.05604e+06	3.2069e+06	3374261	2.07561e+06	3.57922e+06	2.89861e+06	annotated
9885697	109	PE(22:2(13Z,16Z)/15:0)	C42H80NO8P	2.05604e+06	3.2069e+06	3374261	2.07561e+06	3.57922e+06	2.89861e+06	annotated
9885698	109	PE(15:0/22:2(13Z,16Z))	C42H80NO8P	2.05604e+06	3.2069e+06	3374261	2.07561e+06	3.57922e+06	2.89861e+06	annotated
9885710	109	PC(20:2(11Z,14Z)/14:0)	C42H80NO8P	2.05604e+06	3.2069e+06	3374261	2.07561e+06	3.57922e+06	2.89861e+06	annotated
9885711	109	PC(16:1(9Z)/18:1(9Z))	C42H80NO8P	2.05604e+06	3.2069e+06	3374261	2.07561e+06	3.57922e+06	2.89861e+06	annotated
9885712	109	PC(16:1(9Z)/18:1(11Z))	C42H80NO8P	2.05604e+06	3.2069e+06	3374261	2.07561e+06	3.57922e+06	2.89861e+06	annotated
9885713	109	PC(18:1(11Z)/16:1(9Z))	C42H80NO8P	2.05604e+06	3.2069e+06	3374261	2.07561e+06	3.57922e+06	2.89861e+06	annotated
9885714	109	PC(18:2(9Z,12Z)/16:0)	C42H80NO8P	2.05604e+06	3.2069e+06	3374261	2.07561e+06	3.57922e+06	2.89861e+06	annotated
9885715	109	PC(18:1(9Z)/16:1(9Z))	C42H80NO8P	2.05604e+06	3.2069e+06	3374261	2.07561e+06	3.57922e+06	2.89861e+06	annotated
9885716	109	PC(20:1(11Z)/14:1(9Z))	C42H80NO8P	2.05604e+06	3.2069e+06	3374261	2.07561e+06	3.57922e+06	2.89861e+06	annotated
9885717	109	PC(14:1(9Z)/20:1(11Z))	C42H80NO8P	2.05604e+06	3.2069e+06	3374261	2.07561e+06	3.57922e+06	2.89861e+06	annotated
9885718	109	PC(16:0/18:2(9Z,12Z))	C42H80NO8P	2.05604e+06	3.2069e+06	3374261	2.07561e+06	3.57922e+06	2.89861e+06	annotated
9885734	109	PC(14:0/20:2(11Z,14Z))	C42H80NO8P	2.05604e+06	3.2069e+06	3374261	2.07561e+06	3.57922e+06	2.89861e+06	annotated
9885750	109	PE(22:1(11Z)/15:1(9Z))	C42H80NO8P	2.05604e+06	3.2069e+06	3374261	2.07561e+06	3.57922e+06	2.89861e+06	annotated
9885751	109	PC(22:2(13Z,16Z)/12:0)	C42H80NO8P	2.05604e+06	3.2069e+06	3374261	2.07561e+06	3.57922e+06	2.89861e+06	annotated
9885752	109	PC(17:1(9Z)/17:1(9Z))	C42H80NO8P	2.05604e+06	3.2069e+06	3374261	2.07561e+06	3.57922e+06	2.89861e+06	annotated
9885753	109	PC(17:1(10Z)/17:1(10Z))	C42H80NO8P	2.05604e+06	3.2069e+06	3374261	2.07561e+06	3.57922e+06	2.89861e+06	annotated
9885754	109	PC(18:0/16:2(2E,4E))	C42H80NO8P	2.05604e+06	3.2069e+06	3374261	2.07561e+06	3.57922e+06	2.89861e+06	annotated
9885755	109	PC(18:2(2E,4E)/16:0)	C42H80NO8P	2.05604e+06	3.2069e+06	3374261	2.07561e+06	3.57922e+06	2.89861e+06	annotated
9885756	109	PC(18:2(6Z,9Z)/16:0)	C42H80NO8P	2.05604e+06	3.2069e+06	3374261	2.07561e+06	3.57922e+06	2.89861e+06	annotated
9885757	109	PC(16:1(2Z)/18:1(9Z))	C42H80NO8P	2.05604e+06	3.2069e+06	3374261	2.07561e+06	3.57922e+06	2.89861e+06	annotated
9885758	109	PC(16:0/18:2(9E,12E))	C42H80NO8P	2.05604e+06	3.2069e+06	3374261	2.07561e+06	3.57922e+06	2.89861e+06	annotated
9885759	109	PC(16:0/18:2(9E,11Z))	C42H80NO8P	2.05604e+06	3.2069e+06	3374261	2.07561e+06	3.57922e+06	2.89861e+06	annotated
9885760	109	PC(16:0/18:2(9E,11E))	C42H80NO8P	2.05604e+06	3.2069e+06	3374261	2.07561e+06	3.57922e+06	2.89861e+06	annotated
9885761	109	PC(16:0/18:2(11Z,13Z))	C42H80NO8P	2.05604e+06	3.2069e+06	3374261	2.07561e+06	3.57922e+06	2.89861e+06	annotated
9885762	109	PC(16:0/18:2(10E,12Z))	C42H80NO8P	2.05604e+06	3.2069e+06	3374261	2.07561e+06	3.57922e+06	2.89861e+06	annotated
9885763	109	PC(16:0/18:2(6Z,9Z))	C42H80NO8P	2.05604e+06	3.2069e+06	3374261	2.07561e+06	3.57922e+06	2.89861e+06	annotated
9885764	109	PC(16:0/18:2(2Z,4Z))	C42H80NO8P	2.05604e+06	3.2069e+06	3374261	2.07561e+06	3.57922e+06	2.89861e+06	annotated
9885765	109	PC(16:0/18:2(2E,4E))	C42H80NO8P	2.05604e+06	3.2069e+06	3374261	2.07561e+06	3.57922e+06	2.89861e+06	annotated
9885766	109	PC(12:0/22:2(13Z,16Z))	C42H80NO8P	2.05604e+06	3.2069e+06	3374261	2.07561e+06	3.57922e+06	2.89861e+06	annotated
9885767	109	PC(17:0/17:2(9Z,12Z))	C42H80NO8P	2.05604e+06	3.2069e+06	3374261	2.07561e+06	3.57922e+06	2.89861e+06	annotated
9885768	109	PC(17:2(9Z,12Z)/17:0)	C42H80NO8P	2.05604e+06	3.2069e+06	3374261	2.07561e+06	3.57922e+06	2.89861e+06	annotated
9885769	109	PC(15:1(9Z)/19:1(9Z))	C42H80NO8P	2.05604e+06	3.2069e+06	3374261	2.07561e+06	3.57922e+06	2.89861e+06	annotated
9885770	109	PE-NMe(18:1(9E)/18:1(9E))	C42H80NO8P	2.05604e+06	3.2069e+06	3374261	2.07561e+06	3.57922e+06	2.89861e+06	annotated
9885771	109	PE(18:1(9Z)/19:1(9Z))	C42H80NO8P	2.05604e+06	3.2069e+06	3374261	2.07561e+06	3.57922e+06	2.89861e+06	annotated
9885772	109	PE(18:2(9Z,12Z)/19:0)	C42H80NO8P	2.05604e+06	3.2069e+06	3374261	2.07561e+06	3.57922e+06	2.89861e+06	annotated
9885773	109	PE(17:2(9Z,12Z)/20:0)	C42H80NO8P	2.05604e+06	3.2069e+06	3374261	2.07561e+06	3.57922e+06	2.89861e+06	annotated
9885774	109	PE(19:0/18:2(9Z,12Z))	C42H80NO8P	2.05604e+06	3.2069e+06	3374261	2.07561e+06	3.57922e+06	2.89861e+06	annotated
9885775	109	PE(17:0/20:2(11Z,14Z))	C42H80NO8P	2.05604e+06	3.2069e+06	3374261	2.07561e+06	3.57922e+06	2.89861e+06	annotated
9885776	109	PE(17:1(9Z)/20:1(11Z))	C42H80NO8P	2.05604e+06	3.2069e+06	3374261	2.07561e+06	3.57922e+06	2.89861e+06	annotated
9885777	109	PE(15:1(9Z)/22:1(11Z))	C42H80NO8P	2.05604e+06	3.2069e+06	3374261	2.07561e+06	3.57922e+06	2.89861e+06	annotated
9885778	109	PC(19:1(9Z)/15:1(9Z))	C42H80NO8P	2.05604e+06	3.2069e+06	3374261	2.07561e+06	3.57922e+06	2.89861e+06	annotated
9885779	109	PE(20:2(11Z,14Z)/17:0)	C42H80NO8P	2.05604e+06	3.2069e+06	3374261	2.07561e+06	3.57922e+06	2.89861e+06	annotated
9885780	109	PE(19:1(9Z)/18:1(9Z))	C42H80NO8P	2.05604e+06	3.2069e+06	3374261	2.07561e+06	3.57922e+06	2.89861e+06	annotated
9885781	109	PE(20:0/17:2(9Z,12Z))	C42H80NO8P	2.05604e+06	3.2069e+06	3374261	2.07561e+06	3.57922e+06	2.89861e+06	annotated
9885782	109	PE(20:1(11Z)/17:1(9Z))	C42H80NO8P	2.05604e+06	3.2069e+06	3374261	2.07561e+06	3.57922e+06	2.89861e+06	annotated
9885785	112	PC(20:2(11Z,14Z)/16:1(9Z))	C44H82NO8P	555266	885838	865106	595706	1.03861e+06	885567	annotated
9885786	112	PC(20:3(5Z,8Z,11Z)/16:0)	C44H82NO8P	555266	885838	865106	595706	1.03861e+06	885567	annotated
9885787	112	PC(20:3(8Z,11Z,14Z)/16:0)	C44H82NO8P	555266	885838	865106	595706	1.03861e+06	885567	annotated
9885788	112	PC(22:2(13Z,16Z)/14:1(9Z))	C44H82NO8P	555266	885838	865106	595706	1.03861e+06	885567	annotated
9885789	112	PC(16:1(9Z)/20:2(11Z,14Z))	C44H82NO8P	555266	885838	865106	595706	1.03861e+06	885567	annotated
9885790	112	PC(18:0/18:3(9Z,12Z,15Z))	C44H82NO8P	555266	885838	865106	595706	1.03861e+06	885567	annotated
9885791	112	PC(18:0/18:3(6Z,9Z,12Z))	C44H82NO8P	555266	885838	865106	595706	1.03861e+06	885567	annotated
9885792	112	PC(18:1(11Z)/18:2(9Z,12Z))	C44H82NO8P	555266	885838	865106	595706	1.03861e+06	885567	annotated
9885793	112	PC(18:2(9Z,12Z)/18:1(9Z))	C44H82NO8P	555266	885838	865106	595706	1.03861e+06	885567	annotated
9885794	112	PC(18:2(9Z,12Z)/18:1(11Z))	C44H82NO8P	555266	885838	865106	595706	1.03861e+06	885567	annotated
9885795	112	PC(18:1(9Z)/18:2(9Z,12Z))	C44H82NO8P	555266	885838	865106	595706	1.03861e+06	885567	annotated
9885796	112	PC(18:3(6Z,9Z,12Z)/18:0)	C44H82NO8P	555266	885838	865106	595706	1.03861e+06	885567	annotated
9885797	112	PC(18:3(9Z,12Z,15Z)/18:0)	C44H82NO8P	555266	885838	865106	595706	1.03861e+06	885567	annotated
9885798	112	PC(14:1(9Z)/22:2(13Z,16Z))	C44H82NO8P	555266	885838	865106	595706	1.03861e+06	885567	annotated
9885799	112	PC(16:0/20:3(8Z,11Z,14Z))	C44H82NO8P	555266	885838	865106	595706	1.03861e+06	885567	annotated
9885800	112	PC(16:0/20:3(5Z,8Z,11Z))	C44H82NO8P	555266	885838	865106	595706	1.03861e+06	885567	annotated
9885817	112	PE(22:1(11Z)/17:2(9Z,12Z))	C44H82NO8P	555266	885838	865106	595706	1.03861e+06	885567	annotated
9885818	112	PE(22:2(13Z,16Z)/17:1(9Z))	C44H82NO8P	555266	885838	865106	595706	1.03861e+06	885567	annotated
9885819	112	PE(21:0/18:3(9Z,12Z,15Z))	C44H82NO8P	555266	885838	865106	595706	1.03861e+06	885567	annotated
9885820	112	PE(21:0/18:3(6Z,9Z,12Z))	C44H82NO8P	555266	885838	865106	595706	1.03861e+06	885567	annotated
9885821	112	PC(18:1(9Z)/18:2(6Z,9Z))	C44H82NO8P	555266	885838	865106	595706	1.03861e+06	885567	annotated
9885822	112	PC(16:0/20:3(8E,11E,14E))	C44H82NO8P	555266	885838	865106	595706	1.03861e+06	885567	annotated
9885823	112	PC(17:2(9Z,12Z)/19:1(9Z))	C44H82NO8P	555266	885838	865106	595706	1.03861e+06	885567	annotated
9885824	112	PE(17:2(9Z,12Z)/22:1(11Z))	C44H82NO8P	555266	885838	865106	595706	1.03861e+06	885567	annotated
9885825	112	PE(19:0/20:3(8Z,11Z,14Z))	C44H82NO8P	555266	885838	865106	595706	1.03861e+06	885567	annotated
9885826	112	PE(18:3(6Z,9Z,12Z)/21:0)	C44H82NO8P	555266	885838	865106	595706	1.03861e+06	885567	annotated
9885827	112	PE(18:3(9Z,12Z,15Z)/21:0)	C44H82NO8P	555266	885838	865106	595706	1.03861e+06	885567	annotated
9885828	112	PE(17:1(9Z)/22:2(13Z,16Z))	C44H82NO8P	555266	885838	865106	595706	1.03861e+06	885567	annotated
9885829	112	PC(19:1(9Z)/17:2(9Z,12Z))	C44H82NO8P	555266	885838	865106	595706	1.03861e+06	885567	annotated
9885830	112	PE(20:2(11Z,14Z)/19:1(9Z))	C44H82NO8P	555266	885838	865106	595706	1.03861e+06	885567	annotated
9885831	112	PE(19:1(9Z)/20:2(11Z,14Z))	C44H82NO8P	555266	885838	865106	595706	1.03861e+06	885567	annotated
9885832	112	PE(20:3(8Z,11Z,14Z)/19:0)	C44H82NO8P	555266	885838	865106	595706	1.03861e+06	885567	annotated
9885833	116	PC(P-18:1(11Z)/18:2(9Z,12Z))	C44H82NO7P	349101	390175	439591	380323	574914	536880	annotated
9885834	116	PC(P-18:0/18:3(6Z,9Z,12Z))	C44H82NO7P	349101	390175	439591	380323	574914	536880	annotated
9885835	116	PC(P-18:0/18:3(9Z,12Z,15Z))	C44H82NO7P	349101	390175	439591	380323	574914	536880	annotated
9885836	116	PC(P-16:0/20:3(5Z,8Z,11Z))	C44H82NO7P	349101	390175	439591	380323	574914	536880	annotated
9885837	116	PC(P-16:0/20:3(8Z,11Z,14Z))	C44H82NO7P	349101	390175	439591	380323	574914	536880	annotated
9885838	116	PC(P-18:1(9Z)/18:2(9Z,12Z))	C44H82NO7P	349101	390175	439591	380323	574914	536880	annotated
9885839	116	PC(20:3(5Z,8Z,11Z)/P-16:0)	C44H82NO7P	349101	390175	439591	380323	574914	536880	annotated
9885840	116	PC(20:3(8Z,11Z,14Z)/P-16:0)	C44H82NO7P	349101	390175	439591	380323	574914	536880	annotated
9885841	116	PC(18:2(9Z,12Z)/P-18:1(9Z))	C44H82NO7P	349101	390175	439591	380323	574914	536880	annotated
9885842	116	PC(18:2(9Z,12Z)/P-18:1(11Z))	C44H82NO7P	349101	390175	439591	380323	574914	536880	annotated
9885843	116	PC(18:3(6Z,9Z,12Z)/P-18:0)	C44H82NO7P	349101	390175	439591	380323	574914	536880	annotated
9885844	116	PC(18:3(9Z,12Z,15Z)/P-18:0)	C44H82NO7P	349101	390175	439591	380323	574914	536880	annotated
9885845	116	PC(O-18:2(9Z,12Z)/18:2(9Z,12Z))	C44H82NO7P	349101	390175	439591	380323	574914	536880	annotated
9885846	116	PC(O-16:0/20:4(8Z,11Z,14Z,17Z))	C44H82NO7P	349101	390175	439591	380323	574914	536880	annotated
9885848	116	PC(18:2(9Z,12Z)/P-18:1(11Z))	C44H82NO7P	349101	390175	439591	380323	574914	536880	annotated
9885849	116	PC(18:2(9Z,12Z)/P-18:1(9Z))	C44H82NO7P	349101	390175	439591	380323	574914	536880	annotated
9885850	116	PC(18:3(6Z,9Z,12Z)/P-18:0)	C44H82NO7P	349101	390175	439591	380323	574914	536880	annotated
9885851	116	PC(18:3(9Z,12Z,15Z)/P-18:0)	C44H82NO7P	349101	390175	439591	380323	574914	536880	annotated
9885852	116	PC(20:3(8Z,11Z,14Z)/P-16:0)	C44H82NO7P	349101	390175	439591	380323	574914	536880	annotated
9885853	116	PC(20:3(5Z,8Z,11Z)/P-16:0)	C44H82NO7P	349101	390175	439591	380323	574914	536880	annotated
9885854	116	PC(O-18:0/18:4(6Z,9Z,12Z,15Z))	C44H82NO7P	349101	390175	439591	380323	574914	536880	annotated
9885855	116	PC(O-16:0/20:4(5E,8E,11E,14E))	C44H82NO7P	349101	390175	439591	380323	574914	536880	annotated
9885856	116	PC(O-16:0/20:4(5Z,8Z,11Z,14Z))	C44H82NO7P	349101	390175	439591	380323	574914	536880	annotated
9885857	116	PC(P-16:0/20:3(8Z,11Z,14Z))	C44H82NO7P	349101	390175	439591	380323	574914	536880	annotated
9885858	116	PC(P-18:0/18:3(9Z,12Z,15Z))	C44H82NO7P	349101	390175	439591	380323	574914	536880	annotated
9885859	116	PC(P-16:0/20:3(5Z,8Z,11Z))	C44H82NO7P	349101	390175	439591	380323	574914	536880	annotated
9885861	117	PE(20:0/14:1(9Z))	C39H76NO8P	525234	645033	658053	531570	614910	495011	annotated
9885862	117	PE(20:1(11Z)/14:0)	C39H76NO8P	525234	645033	658053	531570	614910	495011	annotated
9885863	117	PE(18:1(9Z)/16:0)	C39H76NO8P	525234	645033	658053	531570	614910	495011	annotated
9885864	117	PE(18:1(11Z)/16:0)	C39H76NO8P	525234	645033	658053	531570	614910	495011	annotated
9885865	117	PE(14:1(9Z)/20:0)	C39H76NO8P	525234	645033	658053	531570	614910	495011	annotated
9885866	117	PE(14:0/20:1(11Z))	C39H76NO8P	525234	645033	658053	531570	614910	495011	annotated
9885867	117	PE(16:0/18:1(11Z))	C39H76NO8P	525234	645033	658053	531570	614910	495011	annotated
9885868	117	PE(16:0/18:1(9Z))	C39H76NO8P	525234	645033	658053	531570	614910	495011	annotated
9885869	117	PE(18:0/16:1(9Z))	C39H76NO8P	525234	645033	658053	531570	614910	495011	annotated
9885870	117	PE(16:1(9Z)/18:0)	C39H76NO8P	525234	645033	658053	531570	614910	495011	annotated
9885875	117	PC(16:1(9Z)/15:0)	C39H76NO8P	525234	645033	658053	531570	614910	495011	annotated
9885876	117	PC(15:0/16:1(9Z))	C39H76NO8P	525234	645033	658053	531570	614910	495011	annotated
9885877	117	1-Hexadecanoyl-2-(9Z-octadecenoyl)-sn-glycero-3-phosphoethanolamine	C39H76NO8P	525234	645033	658053	531570	614910	495011	annotated
9885893	117	PC(16:0/15:1(14))	C39H76NO8P	525234	645033	658053	531570	614910	495011	annotated
9885894	117	PC(17:0/14:1(9Z))	C39H76NO8P	525234	645033	658053	531570	614910	495011	annotated
9885895	117	PE(22:1(11Z)/12:0)	C39H76NO8P	525234	645033	658053	531570	614910	495011	annotated
9885896	117	PC(12:0/19:1(9Z))	C39H76NO8P	525234	645033	658053	531570	614910	495011	annotated
9885897	117	PC(14:0/17:1(9Z))	C39H76NO8P	525234	645033	658053	531570	614910	495011	annotated
9885898	117	PC(13:0/18:1(9Z))	C39H76NO8P	525234	645033	658053	531570	614910	495011	annotated
9885899	117	PC(14:1(9Z)/17:0)	C39H76NO8P	525234	645033	658053	531570	614910	495011	annotated
9885900	117	PC(17:1(9Z)/14:0)	C39H76NO8P	525234	645033	658053	531570	614910	495011	annotated
9885901	117	PC(18:1(9Z)/13:0)	C39H76NO8P	525234	645033	658053	531570	614910	495011	annotated
9885902	117	PC(15:1(9Z)/16:0)	C39H76NO8P	525234	645033	658053	531570	614910	495011	annotated
9885903	117	PC(16:0/15:1(9Z))	C39H76NO8P	525234	645033	658053	531570	614910	495011	annotated
9885904	117	PE(12:0/22:1(11Z))	C39H76NO8P	525234	645033	658053	531570	614910	495011	annotated
9885905	117	PE(16:0/18:1(7Z))	C39H76NO8P	525234	645033	658053	531570	614910	495011	annotated
9885906	117	PE(19:0/15:1(9Z))	C39H76NO8P	525234	645033	658053	531570	614910	495011	annotated
9885907	117	PE(19:1(9Z)/15:0)	C39H76NO8P	525234	645033	658053	531570	614910	495011	annotated
9885908	117	PE(15:1(9Z)/19:0)	C39H76NO8P	525234	645033	658053	531570	614910	495011	annotated
9885909	117	PE(15:0/19:1(9Z))	C39H76NO8P	525234	645033	658053	531570	614910	495011	annotated
9885910	117	PE(17:0/17:1(9Z))	C39H76NO8P	525234	645033	658053	531570	614910	495011	annotated
9885911	117	PE(17:1(9Z)/17:0)	C39H76NO8P	525234	645033	658053	531570	614910	495011	annotated
9885912	117	PC(19:1(9Z)/12:0)	C39H76NO8P	525234	645033	658053	531570	614910	495011	annotated
9885915	119	PC(20:2(11Z,14Z)/18:1(9Z))	C46H86NO8P	203421	313605	331900	233599	315565	314024	annotated
9885916	119	PC(20:2(11Z,14Z)/18:1(11Z))	C46H86NO8P	203421	313605	331900	233599	315565	314024	annotated
9885917	119	PC(20:1(11Z)/18:2(9Z,12Z))	C46H86NO8P	203421	313605	331900	233599	315565	314024	annotated
9885918	119	PC(20:3(5Z,8Z,11Z)/18:0)	C46H86NO8P	203421	313605	331900	233599	315565	314024	annotated
9885919	119	PC(20:3(8Z,11Z,14Z)/18:0)	C46H86NO8P	203421	313605	331900	233599	315565	314024	annotated
9885921	119	PC(22:2(13Z,16Z)/16:1(9Z))	C46H86NO8P	203421	313605	331900	233599	315565	314024	annotated
9885922	119	PC(18:0/20:3(8Z,11Z,14Z))	C46H86NO8P	203421	313605	331900	233599	315565	314024	annotated
9885923	119	PC(18:0/20:3(5Z,8Z,11Z))	C46H86NO8P	203421	313605	331900	233599	315565	314024	annotated
9885925	119	PC(16:1(9Z)/22:2(13Z,16Z))	C46H86NO8P	203421	313605	331900	233599	315565	314024	annotated
9885926	119	PC(18:1(11Z)/20:2(11Z,14Z))	C46H86NO8P	203421	313605	331900	233599	315565	314024	annotated
9885927	119	PC(18:1(9Z)/20:2(11Z,14Z))	C46H86NO8P	203421	313605	331900	233599	315565	314024	annotated
9885928	119	PC(18:3(6Z,9Z,12Z)/20:0)	C46H86NO8P	203421	313605	331900	233599	315565	314024	annotated
9885929	119	PC(18:2(9Z,12Z)/20:1(11Z))	C46H86NO8P	203421	313605	331900	233599	315565	314024	annotated
9885930	119	PC(18:3(9Z,12Z,15Z)/20:0)	C46H86NO8P	203421	313605	331900	233599	315565	314024	annotated
9885931	119	PC(20:0/18:3(9Z,12Z,15Z))	C46H86NO8P	203421	313605	331900	233599	315565	314024	annotated
9885932	119	PC(20:0/18:3(6Z,9Z,12Z))	C46H86NO8P	203421	313605	331900	233599	315565	314024	annotated
9885943	119	PE(22:2(13Z,16Z)/19:1(9Z))	C46H86NO8P	203421	313605	331900	233599	315565	314024	annotated
9885944	119	PE(21:0/20:3(8Z,11Z,14Z))	C46H86NO8P	203421	313605	331900	233599	315565	314024	annotated
9885946	119	PC(18:0/20:3(5Z,11Z,14Z))	C46H86NO8P	203421	313605	331900	233599	315565	314024	annotated
9885947	119	PC(18:0/20:3(5Z,8Z,14Z))	C46H86NO8P	203421	313605	331900	233599	315565	314024	annotated
9885948	119	PC(18:2(9Z,12Z)/20:1(13Z))	C46H86NO8P	203421	313605	331900	233599	315565	314024	annotated
9885958	119	PE(19:1(9Z)/22:2(13Z,16Z))	C46H86NO8P	203421	313605	331900	233599	315565	314024	annotated
9885961	119	PE(20:3(8Z,11Z,14Z)/21:0)	C46H86NO8P	203421	313605	331900	233599	315565	314024	annotated
9886008	128	PG(19:0/18:0)	C43H85O10P	70653.6	85936.4	89205.6	86266.8	120161	102370	annotated
9886009	128	PG(21:0/16:0)	C43H85O10P	70653.6	85936.4	89205.6	86266.8	120161	102370	annotated
9886010	128	PG(22:0/15:0)	C43H85O10P	70653.6	85936.4	89205.6	86266.8	120161	102370	annotated
9886011	128	PG(17:0/20:0)	C43H85O10P	70653.6	85936.4	89205.6	86266.8	120161	102370	annotated
9886012	128	PG(18:0/19:0)	C43H85O10P	70653.6	85936.4	89205.6	86266.8	120161	102370	annotated
9886013	128	PG(20:0/17:0)	C43H85O10P	70653.6	85936.4	89205.6	86266.8	120161	102370	annotated
9886014	128	PG(16:0/21:0)	C43H85O10P	70653.6	85936.4	89205.6	86266.8	120161	102370	annotated
9886015	128	PG(15:0/22:0)	C43H85O10P	70653.6	85936.4	89205.6	86266.8	120161	102370	annotated
9886016	130	PE(24:1(15Z)/16:1(9Z))	C45H86NO8P	88364.3	118501	120358	80291.5	97691.1	89719.6	annotated
9886017	130	PE(20:2(11Z,14Z)/20:0)	C45H86NO8P	88364.3	118501	120358	80291.5	97691.1	89719.6	annotated
9886018	130	PE(20:0/20:2(11Z,14Z))	C45H86NO8P	88364.3	118501	120358	80291.5	97691.1	89719.6	annotated
9886019	130	PE(20:1(11Z)/20:1(11Z))	C45H86NO8P	88364.3	118501	120358	80291.5	97691.1	89719.6	annotated
9886020	130	PE(22:0/18:2(9Z,12Z))	C45H86NO8P	88364.3	118501	120358	80291.5	97691.1	89719.6	annotated
9886021	130	PE(22:2(13Z,16Z)/18:0)	C45H86NO8P	88364.3	118501	120358	80291.5	97691.1	89719.6	annotated
9886022	130	PE(22:1(13Z)/18:1(11Z))	C45H86NO8P	88364.3	118501	120358	80291.5	97691.1	89719.6	annotated
9886023	130	PE(22:1(13Z)/18:1(9Z))	C45H86NO8P	88364.3	118501	120358	80291.5	97691.1	89719.6	annotated
9886024	130	PE(18:1(9Z)/22:1(13Z))	C45H86NO8P	88364.3	118501	120358	80291.5	97691.1	89719.6	annotated
9886025	130	PE(18:1(11Z)/22:1(13Z))	C45H86NO8P	88364.3	118501	120358	80291.5	97691.1	89719.6	annotated
9886026	130	PE(18:0/22:2(13Z,16Z))	C45H86NO8P	88364.3	118501	120358	80291.5	97691.1	89719.6	annotated
9886027	130	PE(18:2(9Z,12Z)/22:0)	C45H86NO8P	88364.3	118501	120358	80291.5	97691.1	89719.6	annotated
9886028	130	PE(16:1(9Z)/24:1(15Z))	C45H86NO8P	88364.3	118501	120358	80291.5	97691.1	89719.6	annotated
9886029	130	PC(22:2(13Z,16Z)/15:0)	C45H86NO8P	88364.3	118501	120358	80291.5	97691.1	89719.6	annotated
9886030	130	PC(15:0/22:2(13Z,16Z))	C45H86NO8P	88364.3	118501	120358	80291.5	97691.1	89719.6	annotated
9886038	130	PC(22:1(11Z)/15:1(9Z))	C45H86NO8P	88364.3	118501	120358	80291.5	97691.1	89719.6	annotated
9886040	130	PE(22:1(11Z)/18:1(9Z))	C45H86NO8P	88364.3	118501	120358	80291.5	97691.1	89719.6	annotated
9886041	130	PC(17:0/20:2(11Z,14Z))	C45H86NO8P	88364.3	118501	120358	80291.5	97691.1	89719.6	annotated
9886042	130	PC(17:2(9Z,12Z)/20:0)	C45H86NO8P	88364.3	118501	120358	80291.5	97691.1	89719.6	annotated
9886043	130	PC(17:1(9Z)/20:1(11Z))	C45H86NO8P	88364.3	118501	120358	80291.5	97691.1	89719.6	annotated
9886044	130	PC(15:1(9Z)/22:1(11Z))	C45H86NO8P	88364.3	118501	120358	80291.5	97691.1	89719.6	annotated
9886045	130	PE(18:1(9Z)/22:1(11Z))	C45H86NO8P	88364.3	118501	120358	80291.5	97691.1	89719.6	annotated
9886046	130	PC(19:1(9Z)/18:1(9Z))	C45H86NO8P	88364.3	118501	120358	80291.5	97691.1	89719.6	annotated
9886047	130	PC(20:0/17:2(9Z,12Z))	C45H86NO8P	88364.3	118501	120358	80291.5	97691.1	89719.6	annotated
9886048	130	PC(19:0/18:2(9Z,12Z))	C45H86NO8P	88364.3	118501	120358	80291.5	97691.1	89719.6	annotated
9886049	130	PC(18:2(9Z,12Z)/19:0)	C45H86NO8P	88364.3	118501	120358	80291.5	97691.1	89719.6	annotated
9886050	130	PC(18:1(9Z)/19:1(9Z))	C45H86NO8P	88364.3	118501	120358	80291.5	97691.1	89719.6	annotated
9886051	130	PC(20:1(11Z)/17:1(9Z))	C45H86NO8P	88364.3	118501	120358	80291.5	97691.1	89719.6	annotated
9886052	130	PC(20:2(11Z,14Z)/17:0)	C45H86NO8P	88364.3	118501	120358	80291.5	97691.1	89719.6	annotated
9886053	145	beta-Elemonic acid	C30H46O3	35816.3	19256.8	39940.2	43146	32239.7	36986.8	annotated
9886054	145	Glypallidifloric acid	C30H46O3	35816.3	19256.8	39940.2	43146	32239.7	36986.8	annotated
9886055	145	Ganoderiol F	C30H46O3	35816.3	19256.8	39940.2	43146	32239.7	36986.8	annotated
9886056	145	Bryononic acid	C30H46O3	35816.3	19256.8	39940.2	43146	32239.7	36986.8	annotated
9886057	145	Mangiferonic acid	C30H46O3	35816.3	19256.8	39940.2	43146	32239.7	36986.8	annotated
9886058	145	Desoxoglabrolide	C30H46O3	35816.3	19256.8	39940.2	43146	32239.7	36986.8	annotated
9886059	145	Tomentosolic acid	C30H46O3	35816.3	19256.8	39940.2	43146	32239.7	36986.8	annotated
9886060	145	Isomasticadienonic acid	C30H46O3	35816.3	19256.8	39940.2	43146	32239.7	36986.8	annotated
9886061	145	9(11)-Dehydroglycyrrhetic acid	C30H46O3	35816.3	19256.8	39940.2	43146	32239.7	36986.8	annotated
9886062	145	3beta-3-Hydroxy-11-oxolanosta-8,24-dien-26-al	C30H46O3	35816.3	19256.8	39940.2	43146	32239.7	36986.8	annotated
9886063	145	Ganoderic acid Y	C30H46O3	35816.3	19256.8	39940.2	43146	32239.7	36986.8	annotated
9886064	145	Masticadienonic acid	C30H46O3	35816.3	19256.8	39940.2	43146	32239.7	36986.8	annotated
9886065	145	Lucidal	C30H46O3	35816.3	19256.8	39940.2	43146	32239.7	36986.8	annotated
9886066	145	Micromeric acid	C30H46O3	35816.3	19256.8	39940.2	43146	32239.7	36986.8	annotated
9886067	145	Epoxyganoderiol B	C30H46O3	35816.3	19256.8	39940.2	43146	32239.7	36986.8	annotated
9886068	145	Ganoderal B	C30H46O3	35816.3	19256.8	39940.2	43146	32239.7	36986.8	annotated
9886069	145	Ursonic acid	C30H46O3	35816.3	19256.8	39940.2	43146	32239.7	36986.8	annotated
9886070	145	Katononic acid	C30H46O3	35816.3	19256.8	39940.2	43146	32239.7	36986.8	annotated
9886071	145	EB 1129	C30H46O3	35816.3	19256.8	39940.2	43146	32239.7	36986.8	annotated
9886072	145	1alpha,24-Dihydroxy-22-ene-24-cyclopropylvitamin D3	C30H46O3	35816.3	19256.8	39940.2	43146	32239.7	36986.8	annotated
9886073	145	(22E,24E)-1alpha,25-dihydroxy-26,27-dimethyl-22,23,24,24a-tetradehydro-24a-homovitamin D3 / (22E,24E)-1alpha,25-dihydroxy-26,27-dimethyl-22,23,24,24a-tetradehydro-24a-homocholecalciferol	C30H46O3	35816.3	19256.8	39940.2	43146	32239.7	36986.8	annotated
9886074	145	1alpha,25-dihydroxy-26,27-dimethyl-22,22,23,23-tetradehydro-24a-homovitamin D3 / 1alpha,25-dihydroxy-26,27-dimethyl-22,22,23,23-tetradehydro-24a-homocholecalciferol	C30H46O3	35816.3	19256.8	39940.2	43146	32239.7	36986.8	annotated
9886075	145	1alpha,25-dihydroxy-26,27-dimethyl-22,22,23,23-tetradehydro-24a-homo-20-epivitamin D3 / 1alpha,25-dihydroxy-26,27-dimethyl-22,22,23,23-tetradehydro-24a-homo-20-epicholecalciferol	C30H46O3	35816.3	19256.8	39940.2	43146	32239.7	36986.8	annotated
9886076	145	Moronic acid	C30H46O3	35816.3	19256.8	39940.2	43146	32239.7	36986.8	annotated
9886077	145	Glycyrrhetaldehyde	C30H46O3	35816.3	19256.8	39940.2	43146	32239.7	36986.8	annotated
9886078	146	L-Acetylcarnitine	C9H17NO4	628321	2.14116e+06	2.17475e+06	451299	1.15325e+06	1.0909e+06	annotated
9886081	146	N-lactoyl-Leucine	C9H17NO4	628321	2.14116e+06	2.17475e+06	451299	1.15325e+06	1.0909e+06	annotated
9886084	146	O-Acetylcarnitine	C9H17NO4	628321	2.14116e+06	2.17475e+06	451299	1.15325e+06	1.0909e+06	identified
9886085	148	L-Arginine	C6H14N4O2	2.01832e+06	4.42946e+06	5.06709e+06	1.82948e+06	5144100	4.70732e+06	identified+fragment
9886086	148	D-Arginine	C6H14N4O2	2.01832e+06	4.42946e+06	5.06709e+06	1.82948e+06	5144100	4.70732e+06	annotated+fragment
9886087	148	Amino acid(Arg-)	C6H14N4O2	2.01832e+06	4.42946e+06	5.06709e+06	1.82948e+06	5144100	4.70732e+06	annotated+fragment
9886109	159	Cyananin	C16H10Cl2N2O5	15801.6	25434.5	25432.4	10293.5	26601.6	26757.2	annotated
9886115	160	6-Chlorocatechin	C15H13ClO6	11724.1	26338.2	25644.8	10645.6	28728.3	28039.8	annotated
9886179	161	2-Aminophenoxazin-3-one	C12H8N2O2	10241.5	22727.7	21956.2	7125.28	26344.9	22115.8	annotated
9886180	162	MK 571	C26H27ClN2O3S2	2690.23	14658.9	18748.9	2509.83	18804.8	17656.7	annotated
9886208	173	Cystathionine sulfoxide	C7H14N2O5S	3099.31	10070.2	7559.46	2768.81	8811.64	8668.5	annotated
9886209	173	3-Hydroxyflavone	C15H10O3	3099.31	10070.2	7559.46	2768.81	8811.64	8668.5	annotated
9886210	173	2-Hydroxymethylanthraquinone	C15H10O3	3099.31	10070.2	7559.46	2768.81	8811.64	8668.5	annotated
9886211	173	2'-Hydroxyisoflavone	C15H10O3	3099.31	10070.2	7559.46	2768.81	8811.64	8668.5	annotated
9886213	173	7-Hydroxyflavone	C15H10O3	3099.31	10070.2	7559.46	2768.81	8811.64	8668.5	annotated
9886214	173	6-Hydroxyflavone	C15H10O3	3099.31	10070.2	7559.46	2768.81	8811.64	8668.5	annotated
9886215	173	7-Hydroxyisoflavone	C15H10O3	3099.31	10070.2	7559.46	2768.81	8811.64	8668.5	annotated
9886216	173	Primuletin	C15H10O3	3099.31	10070.2	7559.46	2768.81	8811.64	8668.5	annotated
9886217	173	2'-Hydroxyflavone	C15H10O3	3099.31	10070.2	7559.46	2768.81	8811.64	8668.5	annotated
9886220	176	6-Hydroxytryprostatin B	C21H25N3O3	3932.48	9399.63	5490.02	3633.78	5308.54	4425.42	annotated
9886245	180	Phosacetim	C14H13Cl2N2O2PS	5890.29	9625.22	11319.5	5235.28	11669.9	9417.64	annotated
9886278	183	Brassicanal C	C10H9NO3S	3756.85	7641.23	7892.38	2367.33	8469.46	7910.64	annotated
9886279	183	Probenazole	C10H9NO3S	3756.85	7641.23	7892.38	2367.33	8469.46	7910.64	annotated
9886403	198	7E-Mycosinyl acetate	C15H12O4	3799.28	6277.29	6249.33	2565.22	5483.53	5385.27	annotated
9886404	198	Dihydrodaidzein	C15H12O4	3799.28	6277.29	6249.33	2565.22	5483.53	5385.27	annotated
9886405	198	(S)-Pinocembrin	C15H12O4	3799.28	6277.29	6249.33	2565.22	5483.53	5385.27	annotated
9886406	198	(E)-2,4,4'-Trihydroxychalcone	C15H12O4	3799.28	6277.29	6249.33	2565.22	5483.53	5385.27	annotated
9886407	198	(2S)-Liquiritigenin	C15H12O4	3799.28	6277.29	6249.33	2565.22	5483.53	5385.27	annotated
9886408	198	Emodinanthranol	C15H12O4	3799.28	6277.29	6249.33	2565.22	5483.53	5385.27	annotated
9886409	198	2-Dehydro-O-desmethylangolensin	C15H12O4	3799.28	6277.29	6249.33	2565.22	5483.53	5385.27	annotated
9886410	198	Isoliquiritigenin	C15H12O4	3799.28	6277.29	6249.33	2565.22	5483.53	5385.27	annotated
9886411	198	4'-Methoxybenzophenone-2-carboxylic acid	C15H12O4	3799.28	6277.29	6249.33	2565.22	5483.53	5385.27	annotated
9886412	198	3,9-Dihydroxypterocarpan	C15H12O4	3799.28	6277.29	6249.33	2565.22	5483.53	5385.27	annotated
9886413	198	cis-3,4-Phenanthrenedihydrodiol-4-carboxylate	C15H12O4	3799.28	6277.29	6249.33	2565.22	5483.53	5385.27	annotated
9886414	198	Liquiritigenin	C15H12O4	3799.28	6277.29	6249.33	2565.22	5483.53	5385.27	annotated
9886415	198	Pinocembrin	C15H12O4	3799.28	6277.29	6249.33	2565.22	5483.53	5385.27	annotated
9886416	198	Hydrangenol	C15H12O4	3799.28	6277.29	6249.33	2565.22	5483.53	5385.27	annotated
9886417	198	Aloe emodin anthrone	C15H12O4	3799.28	6277.29	6249.33	2565.22	5483.53	5385.27	annotated
9886418	198	3',5'-Dihydroxyflavanone	C15H12O4	3799.28	6277.29	6249.33	2565.22	5483.53	5385.27	annotated
9886419	198	2',4',6'-Trihydroxychalcone	C15H12O4	3799.28	6277.29	6249.33	2565.22	5483.53	5385.27	annotated
9886420	198	Haginin D	C15H12O4	3799.28	6277.29	6249.33	2565.22	5483.53	5385.27	annotated
9886421	198	Demethylmedicarpin	C15H12O4	3799.28	6277.29	6249.33	2565.22	5483.53	5385.27	annotated
9886422	198	6-Demethylvignafuran	C15H12O4	3799.28	6277.29	6249.33	2565.22	5483.53	5385.27	annotated
9886423	198	Centrolobofuran	C15H12O4	3799.28	6277.29	6249.33	2565.22	5483.53	5385.27	annotated
9886424	198	3,4,2'-Trihydroxychalcone	C15H12O4	3799.28	6277.29	6249.33	2565.22	5483.53	5385.27	annotated
9886425	198	4,2',5'-Trihydroxychalcone	C15H12O4	3799.28	6277.29	6249.33	2565.22	5483.53	5385.27	annotated
9886426	198	Lucidone	C15H12O4	3799.28	6277.29	6249.33	2565.22	5483.53	5385.27	annotated
9886436	205	Dorzolamide	C10H16N2O4S3	2417.01	5715.2	5218.69	2350.23	5257.47	5261.39	annotated
9886438	206	Pantothenic acid	C9H17NO5	1.09703e+06	4648990	4650153	524685	2646162	1.87679e+06	annotated+fragment
9886440	206	Pantothenate	C9H17NO5	1.09703e+06	4648990	4650153	524685	2646162	1.87679e+06	annotated+fragment
9886445	208	Benzo[ghi]fluoranthene	C18H10	8595.09	28546.7	32061.4	5892.32	18930.1	18241.3	annotated
9886446	208	Cyclopenta[cd]pyrene	C18H10	8595.09	28546.7	32061.4	5892.32	18930.1	18241.3	annotated
9886458	211	Porphobilinogen	C10H14N2O4	3569.06	10538.3	11901.4	3433.04	6746.79	4214.09	annotated
9886459	212	Dulxanthone E	C22H22O7	1.46956e+06	2.53322e+06	1.89102e+06	2.2735e+06	3091135	2.66851e+06	annotated+fragment
9886460	212	5'-Methoxycurcumin	C22H22O7	1.46956e+06	2.53322e+06	1.89102e+06	2.2735e+06	3091135	2.66851e+06	annotated+fragment
9886461	212	S-Adenosyl-L-methionine	C15H22N6O5S	1.46956e+06	2.53322e+06	1.89102e+06	2.2735e+06	3091135	2.66851e+06	annotated+fragment
9886462	212	Deoxypodophyllotoxin	C22H22O7	1.46956e+06	2.53322e+06	1.89102e+06	2.2735e+06	3091135	2.66851e+06	annotated+fragment
9886463	212	Isorhynchospermin	C22H22O7	1.46956e+06	2.53322e+06	1.89102e+06	2.2735e+06	3091135	2.66851e+06	annotated+fragment
9886464	212	Rhynchospermin	C22H22O7	1.46956e+06	2.53322e+06	1.89102e+06	2.2735e+06	3091135	2.66851e+06	annotated+fragment
9886465	212	5,7-Dihydroxy-3,6-dimethoxy-4'-prenyloxyflavone	C22H22O7	1.46956e+06	2.53322e+06	1.89102e+06	2.2735e+06	3091135	2.66851e+06	annotated+fragment
9886466	212	5,3',4'-Trihydroxy-3,7-dimethoxy-6-prenylflavone	C22H22O7	1.46956e+06	2.53322e+06	1.89102e+06	2.2735e+06	3091135	2.66851e+06	annotated+fragment
9886467	212	Hoslunddiol	C22H22O7	1.46956e+06	2.53322e+06	1.89102e+06	2.2735e+06	3091135	2.66851e+06	annotated+fragment
9886468	212	5-Hydroxy-2-(3-hydroxy-4-methoxyphenyl)-3-methoxy-7-[(3-methyl-2-butenyl)oxy]-4H-1-benzopyran-4-one	C22H22O7	1.46956e+06	2.53322e+06	1.89102e+06	2.2735e+06	3091135	2.66851e+06	annotated+fragment
9886469	212	5,7-Dihydroxy-3-methoxy-2-[3-methoxy-4-[(3-methyl-2-butenyl)oxy]phenyl]-4H-1-benzopyran-4-one	C22H22O7	1.46956e+06	2.53322e+06	1.89102e+06	2.2735e+06	3091135	2.66851e+06	annotated+fragment
9886470	212	5,4'-Dihydroxy-3,3'-dimethoxy-7-prenyloxyflavone	C22H22O7	1.46956e+06	2.53322e+06	1.89102e+06	2.2735e+06	3091135	2.66851e+06	annotated+fragment
9886471	212	Viridiflorin	C22H22O7	1.46956e+06	2.53322e+06	1.89102e+06	2.2735e+06	3091135	2.66851e+06	annotated+fragment
9886472	212	2'-Hydroxypiscerythrinetin	C22H22O7	1.46956e+06	2.53322e+06	1.89102e+06	2.2735e+06	3091135	2.66851e+06	annotated+fragment
9886473	212	Gnaphaliin 7-epoxymethylbutyl ether	C22H22O7	1.46956e+06	2.53322e+06	1.89102e+06	2.2735e+06	3091135	2.66851e+06	annotated+fragment
9886474	212	6-Prenylherbacetin 3,8-dimethyl ether	C22H22O7	1.46956e+06	2.53322e+06	1.89102e+06	2.2735e+06	3091135	2.66851e+06	annotated+fragment
9886475	212	5,7-Dihydroxy-3,8-dimethoxy-4'-prenyloxyflavone	C22H22O7	1.46956e+06	2.53322e+06	1.89102e+06	2.2735e+06	3091135	2.66851e+06	annotated+fragment
9886476	212	Baohuosu	C22H22O7	1.46956e+06	2.53322e+06	1.89102e+06	2.2735e+06	3091135	2.66851e+06	annotated+fragment
9886477	212	3'-Angeloyloxy-4',6'-dihydroxy-2',5'-dimethoxychalcone	C22H22O7	1.46956e+06	2.53322e+06	1.89102e+06	2.2735e+06	3091135	2.66851e+06	annotated+fragment
9886478	212	Artoindonesianin R	C22H22O7	1.46956e+06	2.53322e+06	1.89102e+06	2.2735e+06	3091135	2.66851e+06	annotated+fragment
9886479	212	Artoindonesianin Q	C22H22O7	1.46956e+06	2.53322e+06	1.89102e+06	2.2735e+06	3091135	2.66851e+06	annotated+fragment
9886481	214	LysoPC(18:0)	C26H54NO7P	216433	1.0179e+06	664135	208528	214105	193515	annotated
9886482	214	PC(0:0/18:0)	C26H54NO7P	216433	1.0179e+06	664135	208528	214105	193515	annotated
9886485	214	PC(O-16:0/2:0)	C26H54NO7P	216433	1.0179e+06	664135	208528	214105	193515	annotated
9886502	214	PE(21:0/0:0)	C26H54NO7P	216433	1.0179e+06	664135	208528	214105	193515	annotated
9886503	216	LysoPC(20:4(8Z,11Z,14Z,17Z))	C28H50NO7P	17053	22689.8	30459.2	23774.8	15105.4	18948.5	annotated
9886504	216	PC(20:4(5Z,8Z,11Z,14Z)/0:0)	C28H50NO7P	17053	22689.8	30459.2	23774.8	15105.4	18948.5	annotated
9886506	216	PC(0:0/20:4(5Z,8Z,11Z,14Z))	C28H50NO7P	17053	22689.8	30459.2	23774.8	15105.4	18948.5	annotated
9886507	217	PC(O-18:0/O-2:0)	C28H60NO6P	4965.26	21128.4	16528	0	10528.7	6450.29	annotated
9886508	217	PC(O-20:0/0:0)	C28H60NO6P	4965.26	21128.4	16528	0	10528.7	6450.29	annotated
9886512	219	Propionylcarnitine	C10H19NO4	1.84688e+06	2.58579e+06	1.8006e+06	1.26837e+06	1305103	1.01071e+06	annotated
9886513	219	O-propanoyl-carnitine	C10H19NO4	1.84688e+06	2.58579e+06	1.8006e+06	1.26837e+06	1305103	1.01071e+06	annotated
9886517	220	S-Allylcysteine	C6H11NO2S	885620	2564386	4.82055e+06	516959	2.11335e+06	1.81537e+06	annotated
9886520	220	trans-S-(1-Propenyl)-L-cysteine	C6H11NO2S	885620	2564386	4.82055e+06	516959	2.11335e+06	1.81537e+06	annotated
9886521	220	Entadamide A	C6H11NO2S	885620	2564386	4.82055e+06	516959	2.11335e+06	1.81537e+06	annotated
9886522	220	S-Allyl-L-cysteine	C6H11NO2S	885620	2564386	4.82055e+06	516959	2.11335e+06	1.81537e+06	annotated
9886537	222	Creatinine	C4H7N3O	1.30254e+06	4.61081e+06	4.13901e+06	1.13982e+06	4.59662e+06	2.53962e+06	identified
9886538	222	3-(N-Nitrosomethylamino)propionitrile	C4H7N3O	1.30254e+06	4.61081e+06	4.13901e+06	1.13982e+06	4.59662e+06	2.53962e+06	annotated
9886539	223	7-Methylguanine	C6H7N5O	49438.4	131949	122443	29010.3	79810.2	61144.5	annotated
9886540	223	N2-Methylguanine	C6H7N5O	49438.4	131949	122443	29010.3	79810.2	61144.5	annotated
9886541	223	3-Methylguanine	C6H7N5O	49438.4	131949	122443	29010.3	79810.2	61144.5	annotated
9886542	223	1-Methylguanine	C6H7N5O	49438.4	131949	122443	29010.3	79810.2	61144.5	annotated
9886544	224	Dolasetron	C19H20N2O3	8598.45	31703.2	27047.4	7672.66	30491.3	16121	annotated
9886550	224	Dolasetron	C19H20N2O3	8598.45	31703.2	27047.4	7672.66	30491.3	16121	annotated
9886551	224	Oxyphenbutazone	C19H20N2O3	8598.45	31703.2	27047.4	7672.66	30491.3	16121	annotated
9886554	226	PE(18:4(6Z,9Z,12Z,15Z)/P-18:0)	C41H74NO7P	707519	858589	879329	713358	919237	841419	annotated
9886555	226	PE(20:4(8Z,11Z,14Z,17Z)/P-16:0)	C41H74NO7P	707519	858589	879329	713358	919237	841419	annotated
9886556	226	PE(20:4(5Z,8Z,11Z,14Z)/P-16:0)	C41H74NO7P	707519	858589	879329	713358	919237	841419	annotated
9886557	226	PE(18:3(6Z,9Z,12Z)/P-18:1(9Z))	C41H74NO7P	707519	858589	879329	713358	919237	841419	annotated
9886558	226	PE(18:3(9Z,12Z,15Z)/P-18:1(11Z))	C41H74NO7P	707519	858589	879329	713358	919237	841419	annotated
9886559	226	PE(18:3(9Z,12Z,15Z)/P-18:1(9Z))	C41H74NO7P	707519	858589	879329	713358	919237	841419	annotated
9886560	226	PE(18:3(6Z,9Z,12Z)/P-18:1(11Z))	C41H74NO7P	707519	858589	879329	713358	919237	841419	annotated
9886561	226	PE(P-16:0/20:4(8Z,11Z,14Z,17Z))	C41H74NO7P	707519	858589	879329	713358	919237	841419	annotated
9886562	226	PE(P-16:0/20:4(5Z,8Z,11Z,14Z))	C41H74NO7P	707519	858589	879329	713358	919237	841419	annotated
9886563	226	PE(P-18:0/18:4(6Z,9Z,12Z,15Z))	C41H74NO7P	707519	858589	879329	713358	919237	841419	annotated
9886564	226	PE(P-18:1(11Z)/18:3(6Z,9Z,12Z))	C41H74NO7P	707519	858589	879329	713358	919237	841419	annotated
9886565	226	PE(P-18:1(11Z)/18:3(9Z,12Z,15Z))	C41H74NO7P	707519	858589	879329	713358	919237	841419	annotated
9886566	226	PE(P-18:1(9Z)/18:3(6Z,9Z,12Z))	C41H74NO7P	707519	858589	879329	713358	919237	841419	annotated
9886567	226	PE(P-18:1(9Z)/18:3(9Z,12Z,15Z))	C41H74NO7P	707519	858589	879329	713358	919237	841419	annotated
9886573	226	PE(O-16:0/20:5(5Z,8Z,11Z,14Z,17Z))	C41H74NO7P	707519	858589	879329	713358	919237	841419	annotated
9886574	227	PE(20:2(11Z,14Z)/16:0)	C41H78NO8P	685770	662202	708698	643090	655057	595018	annotated
9886575	227	PE(20:1(11Z)/16:1(9Z))	C41H78NO8P	685770	662202	708698	643090	655057	595018	annotated
9886576	227	PE(22:1(13Z)/14:1(9Z))	C41H78NO8P	685770	662202	708698	643090	655057	595018	annotated
9886577	227	PE(22:2(13Z,16Z)/14:0)	C41H78NO8P	685770	662202	708698	643090	655057	595018	annotated
9886578	227	PE(18:2(9Z,12Z)/18:0)	C41H78NO8P	685770	662202	708698	643090	655057	595018	annotated
9886579	227	PE(18:1(9Z)/18:1(11Z))	C41H78NO8P	685770	662202	708698	643090	655057	595018	annotated
9886580	227	PE(18:1(9Z)/18:1(9Z))	C41H78NO8P	685770	662202	708698	643090	655057	595018	annotated
9886581	227	PE(18:1(11Z)/18:1(11Z))	C41H78NO8P	685770	662202	708698	643090	655057	595018	annotated
9886582	227	PE(18:1(11Z)/18:1(9Z))	C41H78NO8P	685770	662202	708698	643090	655057	595018	annotated
9886584	227	PE(14:1(9Z)/22:1(13Z))	C41H78NO8P	685770	662202	708698	643090	655057	595018	annotated
9886585	227	PE(14:0/22:2(13Z,16Z))	C41H78NO8P	685770	662202	708698	643090	655057	595018	annotated
9886586	227	PE(16:0/20:2(11Z,14Z))	C41H78NO8P	685770	662202	708698	643090	655057	595018	annotated
9886587	227	PE(18:0/18:2(9Z,12Z))	C41H78NO8P	685770	662202	708698	643090	655057	595018	annotated
9886588	227	PE(16:1(9Z)/20:1(11Z))	C41H78NO8P	685770	662202	708698	643090	655057	595018	annotated
9886593	227	PC(18:2(9Z,12Z)/15:0)	C41H78NO8P	685770	662202	708698	643090	655057	595018	annotated
9886594	227	PC(15:0/18:2(9Z,12Z))	C41H78NO8P	685770	662202	708698	643090	655057	595018	annotated
9886612	227	PE(22:1(11Z)/14:1(9Z))	C41H78NO8P	685770	662202	708698	643090	655057	595018	annotated
9886613	227	PC(13:0/20:2(11Z,14Z))	C41H78NO8P	685770	662202	708698	643090	655057	595018	annotated
9886614	227	PC(14:1(9Z)/19:1(9Z))	C41H78NO8P	685770	662202	708698	643090	655057	595018	annotated
9886615	227	PC(17:1(9Z)/16:1(9Z))	C41H78NO8P	685770	662202	708698	643090	655057	595018	annotated
9886616	227	PC(17:2(9Z,12Z)/16:0)	C41H78NO8P	685770	662202	708698	643090	655057	595018	annotated
9886617	227	PC(18:1(9Z)/15:1(9Z))	C41H78NO8P	685770	662202	708698	643090	655057	595018	annotated
9886618	227	PC(15:1(9Z)/18:1(9Z))	C41H78NO8P	685770	662202	708698	643090	655057	595018	annotated
9886619	227	PC(16:1(9Z)/17:1(9Z))	C41H78NO8P	685770	662202	708698	643090	655057	595018	annotated
9886620	227	PC(16:0/17:2(9Z,12Z))	C41H78NO8P	685770	662202	708698	643090	655057	595018	annotated
9886621	227	PE(18:1(9E)/18:1(9E))	C41H78NO8P	685770	662202	708698	643090	655057	595018	annotated
9886622	227	PE(18:1(6Z)/18:1(6Z))	C41H78NO8P	685770	662202	708698	643090	655057	595018	annotated
9886623	227	PE(17:2(9Z,12Z)/19:0)	C41H78NO8P	685770	662202	708698	643090	655057	595018	annotated
9886624	227	PE(19:0/17:2(9Z,12Z))	C41H78NO8P	685770	662202	708698	643090	655057	595018	annotated
9886625	227	PE(14:1(9Z)/22:1(11Z))	C41H78NO8P	685770	662202	708698	643090	655057	595018	annotated
9886626	227	PE(17:1(9Z)/19:1(9Z))	C41H78NO8P	685770	662202	708698	643090	655057	595018	annotated
9886627	227	PC(19:1(9Z)/14:1(9Z))	C41H78NO8P	685770	662202	708698	643090	655057	595018	annotated
9886628	227	PE(19:1(9Z)/17:1(9Z))	C41H78NO8P	685770	662202	708698	643090	655057	595018	annotated
9886629	227	PC(20:2(11Z,14Z)/13:0)	C41H78NO8P	685770	662202	708698	643090	655057	595018	annotated
9886630	234	L-Alloisoleucine	C6H13NO2	908688	2916761	2382066	753770	2.67593e+06	2.29619e+06	annotated
9886631	234	L-Leucine	C6H13NO2	908688	2916761	2382066	753770	2.67593e+06	2.29619e+06	identified
9886632	234	L-isoleucine	C6H13NO2	908688	2916761	2382066	753770	2.67593e+06	2.29619e+06	identified
9886633	234	Isoleucine	C6H13NO2	908688	2916761	2382066	753770	2.67593e+06	2.29619e+06	annotated
9886634	234	N-(2-Hydroxyethyl)-morpholine	C6H13NO2	908688	2916761	2382066	753770	2.67593e+06	2.29619e+06	annotated
9886635	234	6-amino-hexanoic acid	C6H13NO2	908688	2916761	2382066	753770	2.67593e+06	2.29619e+06	annotated
9886636	234	L-Norleucine	C6H13NO2	908688	2916761	2382066	753770	2.67593e+06	2.29619e+06	annotated
9886638	234	3-Aminocaproic acid	C6H13NO2	908688	2916761	2382066	753770	2.67593e+06	2.29619e+06	annotated
9886639	234	N-methylvaline	C6H13NO2	908688	2916761	2382066	753770	2.67593e+06	2.29619e+06	annotated
9886640	234	6-Deoxyfagomine	C6H13NO2	908688	2916761	2382066	753770	2.67593e+06	2.29619e+06	annotated
9886644	234	D-Leucine	C6H13NO2	908688	2916761	2382066	753770	2.67593e+06	2.29619e+06	annotated
9886645	234	Beta-Leucine	C6H13NO2	908688	2916761	2382066	753770	2.67593e+06	2.29619e+06	annotated
9886646	234	2-Amino-4-methylpentanoic acid	C6H13NO2	908688	2916761	2382066	753770	2.67593e+06	2.29619e+06	annotated
9886648	234	D-Isoleucine	C6H13NO2	908688	2916761	2382066	753770	2.67593e+06	2.29619e+06	annotated
9886649	234	beta-Alaninebetaine	C6H13NO2	908688	2916761	2382066	753770	2.67593e+06	2.29619e+06	annotated
9886650	234	(3R)-beta-Leucine	C6H13NO2	908688	2916761	2382066	753770	2.67593e+06	2.29619e+06	annotated
9886652	234	N,N-Diethylglycine	C6H13NO2	908688	2916761	2382066	753770	2.67593e+06	2.29619e+06	annotated
9886668	240	Verimol C	C18H20O4	4115.93	11366.2	11280.5	3303.85	12021.5	11856.6	annotated
9886669	240	2'-Hydroxy-4',6'-dimethoxy-3'-methyldihydrochalcone	C18H20O4	4115.93	11366.2	11280.5	3303.85	12021.5	11856.6	annotated
9886670	240	1,3-Diacetoxy-4,6,12-tetradecatriene-8,10-diyne	C18H20O4	4115.93	11366.2	11280.5	3303.85	12021.5	11856.6	annotated
9886671	240	Myrigalon B	C18H20O4	4115.93	11366.2	11280.5	3303.85	12021.5	11856.6	annotated
9886672	240	2,2,4-Trimethyl-6-(1-oxo-3-phenylpropyl)-1,3,5-cyclohexanetrione	C18H20O4	4115.93	11366.2	11280.5	3303.85	12021.5	11856.6	annotated
9886673	240	(+)-3'-Hydroxylarreatricin	C18H20O4	4115.93	11366.2	11280.5	3303.85	12021.5	11856.6	annotated
9886674	240	Toxyl angelate	C18H20O4	4115.93	11366.2	11280.5	3303.85	12021.5	11856.6	annotated
9886675	240	alpha,alpha'-Diethyl-3,4,3',4'-stilbenetetraol	C18H20O4	4115.93	11366.2	11280.5	3303.85	12021.5	11856.6	annotated
9886676	240	alpha,alpha'-diethyl-3,4,3',4'-stilbenetetraol	C18H20O4	4115.93	11366.2	11280.5	3303.85	12021.5	11856.6	annotated
9886677	240	5-O-Methyllatifolin	C18H20O4	4115.93	11366.2	11280.5	3303.85	12021.5	11856.6	annotated
9886678	240	4'-Hydroxy-5,7-dimethoxy-8-methylflavan	C18H20O4	4115.93	11366.2	11280.5	3303.85	12021.5	11856.6	annotated
9886679	240	5,7,4'-Trimethoxyflavan	C18H20O4	4115.93	11366.2	11280.5	3303.85	12021.5	11856.6	annotated
9886680	240	Angoletin	C18H20O4	4115.93	11366.2	11280.5	3303.85	12021.5	11856.6	annotated
9886681	241	Gefitinib	C22H24ClFN4O3	3780.9	6798.62	5336.41	4514.8	8867.17	3967.11	annotated
9886682	242	PE-NMe(16:0/16:0)	C38H76NO8P	3.10973e+06	4174869	3.56255e+06	2.49929e+06	2504056	2035740	annotated
9886683	242	PE(15:0/18:0)	C38H76NO8P	3.10973e+06	4174869	3.56255e+06	2.49929e+06	2504056	2035740	annotated
9886684	242	PE(18:0/15:0)	C38H76NO8P	3.10973e+06	4174869	3.56255e+06	2.49929e+06	2504056	2035740	annotated
9886726	242	PC(16:0/14:0)	C38H76NO8P	3.10973e+06	4174869	3.56255e+06	2.49929e+06	2504056	2035740	annotated
9886727	242	PC(15:0/15:0)	C38H76NO8P	3.10973e+06	4174869	3.56255e+06	2.49929e+06	2504056	2035740	annotated
9886752	242	PC(14:0/16:0)	C38H76NO8P	3.10973e+06	4174869	3.56255e+06	2.49929e+06	2504056	2035740	annotated
9886753	242	PE(21:0/12:0)	C38H76NO8P	3.10973e+06	4174869	3.56255e+06	2.49929e+06	2504056	2035740	annotated
9886754	242	PE(19:0/14:0)	C38H76NO8P	3.10973e+06	4174869	3.56255e+06	2.49929e+06	2504056	2035740	annotated
9886755	242	PE(20:0/13:0)	C38H76NO8P	3.10973e+06	4174869	3.56255e+06	2.49929e+06	2504056	2035740	annotated
9886756	242	PE(16:0/17:0)	C38H76NO8P	3.10973e+06	4174869	3.56255e+06	2.49929e+06	2504056	2035740	annotated
9886757	242	PE(13:0/20:0)	C38H76NO8P	3.10973e+06	4174869	3.56255e+06	2.49929e+06	2504056	2035740	annotated
9886758	242	PC(17:0/13:0)	C38H76NO8P	3.10973e+06	4174869	3.56255e+06	2.49929e+06	2504056	2035740	annotated
9886759	242	PC(18:0/12:0)	C38H76NO8P	3.10973e+06	4174869	3.56255e+06	2.49929e+06	2504056	2035740	annotated
9886760	242	PC(19:0/11:0)	C38H76NO8P	3.10973e+06	4174869	3.56255e+06	2.49929e+06	2504056	2035740	annotated
9886761	242	PC(20:0/10:0)	C38H76NO8P	3.10973e+06	4174869	3.56255e+06	2.49929e+06	2504056	2035740	annotated
9886762	242	PC(12:0/18:0)	C38H76NO8P	3.10973e+06	4174869	3.56255e+06	2.49929e+06	2504056	2035740	annotated
9886763	242	PC(11:0/19:0)	C38H76NO8P	3.10973e+06	4174869	3.56255e+06	2.49929e+06	2504056	2035740	annotated
9886764	242	PC(13:0/17:0)	C38H76NO8P	3.10973e+06	4174869	3.56255e+06	2.49929e+06	2504056	2035740	annotated
9886765	242	PC(10:0/20:0)	C38H76NO8P	3.10973e+06	4174869	3.56255e+06	2.49929e+06	2504056	2035740	annotated
9886766	242	PC(9:0/21:0)	C38H76NO8P	3.10973e+06	4174869	3.56255e+06	2.49929e+06	2504056	2035740	annotated
9886767	242	PE(12:0/21:0)	C38H76NO8P	3.10973e+06	4174869	3.56255e+06	2.49929e+06	2504056	2035740	annotated
9886768	242	PE(14:0/19:0)	C38H76NO8P	3.10973e+06	4174869	3.56255e+06	2.49929e+06	2504056	2035740	annotated
9886769	242	PE(17:0/16:0)	C38H76NO8P	3.10973e+06	4174869	3.56255e+06	2.49929e+06	2504056	2035740	annotated
9886770	243	PE(20:2(11Z,14Z)/15:0)	C40H76NO8P	467074	979970	1.08869e+06	532880	828948	795054	annotated
9886771	243	PE(15:0/20:2(11Z,14Z))	C40H76NO8P	467074	979970	1.08869e+06	532880	828948	795054	annotated
9886791	243	PC(16:1(9Z)/16:1(9Z))	C40H76NO8P	467074	979970	1.08869e+06	532880	828948	795054	annotated
9886792	243	PC(18:1(9Z)/14:1(9Z))	C40H76NO8P	467074	979970	1.08869e+06	532880	828948	795054	annotated
9886793	243	PC(18:1(11Z)/14:1(9Z))	C40H76NO8P	467074	979970	1.08869e+06	532880	828948	795054	annotated
9886794	243	PC(18:2(9Z,12Z)/14:0)	C40H76NO8P	467074	979970	1.08869e+06	532880	828948	795054	annotated
9886795	243	PC(14:1(9Z)/18:1(9Z))	C40H76NO8P	467074	979970	1.08869e+06	532880	828948	795054	annotated
9886796	243	PC(14:1(9Z)/18:1(11Z))	C40H76NO8P	467074	979970	1.08869e+06	532880	828948	795054	annotated
9886820	243	PC(14:0/18:2(9Z,12Z))	C40H76NO8P	467074	979970	1.08869e+06	532880	828948	795054	annotated
9886838	243	PE(22:2(13Z,16Z)/13:0)	C40H76NO8P	467074	979970	1.08869e+06	532880	828948	795054	annotated
9886839	243	PC(14:0/18:2(11Z,14Z))	C40H76NO8P	467074	979970	1.08869e+06	532880	828948	795054	annotated
9886840	243	PC(16:1(9E)/16:1(9E))	C40H76NO8P	467074	979970	1.08869e+06	532880	828948	795054	annotated
9886841	243	PC(12:0/20:2(11Z,14Z))	C40H76NO8P	467074	979970	1.08869e+06	532880	828948	795054	annotated
9886842	243	PC(17:1(9Z)/15:1(9Z))	C40H76NO8P	467074	979970	1.08869e+06	532880	828948	795054	annotated
9886843	243	PC(17:2(9Z,12Z)/15:0)	C40H76NO8P	467074	979970	1.08869e+06	532880	828948	795054	annotated
9886844	243	PC(15:0/17:2(9Z,12Z))	C40H76NO8P	467074	979970	1.08869e+06	532880	828948	795054	annotated
9886845	243	PC(15:1(9Z)/17:1(9Z))	C40H76NO8P	467074	979970	1.08869e+06	532880	828948	795054	annotated
9886846	243	PE(18:1(9Z)/17:1(9Z))	C40H76NO8P	467074	979970	1.08869e+06	532880	828948	795054	annotated
9886847	243	PE(18:2(9Z,12Z)/17:0)	C40H76NO8P	467074	979970	1.08869e+06	532880	828948	795054	annotated
9886848	243	PE(17:2(9Z,12Z)/18:0)	C40H76NO8P	467074	979970	1.08869e+06	532880	828948	795054	annotated
9886849	243	PE(18:0/17:2(9Z,12Z))	C40H76NO8P	467074	979970	1.08869e+06	532880	828948	795054	annotated
9886850	243	PE(15:1(9Z)/20:1(11Z))	C40H76NO8P	467074	979970	1.08869e+06	532880	828948	795054	annotated
9886851	243	PE(13:0/22:2(13Z,16Z))	C40H76NO8P	467074	979970	1.08869e+06	532880	828948	795054	annotated
9886852	243	PE(16:1(9Z)/19:1(9Z))	C40H76NO8P	467074	979970	1.08869e+06	532880	828948	795054	annotated
9886853	243	PE(17:0/18:2(9Z,12Z))	C40H76NO8P	467074	979970	1.08869e+06	532880	828948	795054	annotated
9886854	243	PE(17:1(9Z)/18:1(9Z))	C40H76NO8P	467074	979970	1.08869e+06	532880	828948	795054	annotated
9886855	243	PE(19:1(9Z)/16:1(9Z))	C40H76NO8P	467074	979970	1.08869e+06	532880	828948	795054	annotated
9886856	243	PE(20:1(11Z)/15:1(9Z))	C40H76NO8P	467074	979970	1.08869e+06	532880	828948	795054	annotated
9886857	243	PC(20:2(11Z,14Z)/12:0)	C40H76NO8P	467074	979970	1.08869e+06	532880	828948	795054	annotated
9886858	244	SM(d18:1/24:1(15Z))	C47H93N2O6P	379565	471102	445074	334795	415371	354638	annotated
9886859	244	SM(d18:2/24:0)	C47H93N2O6P	379565	471102	445074	334795	415371	354638	annotated
9886860	245	PC(O-20:0/12:0)	C40H82NO7P	465354	463352	403317	407143	359534	245674	annotated
9886861	245	PC(O-18:0/14:0)	C40H82NO7P	465354	463352	403317	407143	359534	245674	annotated
9886862	245	PC(O-14:0/18:0)	C40H82NO7P	465354	463352	403317	407143	359534	245674	annotated
9886863	245	PC(O-16:0/16:0)	C40H82NO7P	465354	463352	403317	407143	359534	245674	annotated
9886864	245	PE(O-18:0/17:0)	C40H82NO7P	465354	463352	403317	407143	359534	245674	annotated
9886865	245	PE(O-20:0/15:0)	C40H82NO7P	465354	463352	403317	407143	359534	245674	annotated
9886866	245	PE(O-16:0/19:0)	C40H82NO7P	465354	463352	403317	407143	359534	245674	annotated
9886867	245	PC(16:0/O-16:0)	C40H82NO7P	465354	463352	403317	407143	359534	245674	annotated
9886868	246	PE(20:2(11Z,14Z)/14:0)	C39H74NO8P	158664	250804	158701	158396	143728	111543	annotated
9886869	246	PE(20:1(11Z)/14:1(9Z))	C39H74NO8P	158664	250804	158701	158396	143728	111543	annotated
9886870	246	PE(18:2(9Z,12Z)/16:0)	C39H74NO8P	158664	250804	158701	158396	143728	111543	annotated
9886871	246	PE(18:1(9Z)/16:1(9Z))	C39H74NO8P	158664	250804	158701	158396	143728	111543	annotated
9886872	246	PE(18:1(11Z)/16:1(9Z))	C39H74NO8P	158664	250804	158701	158396	143728	111543	annotated
9886873	246	PE(14:1(9Z)/20:1(11Z))	C39H74NO8P	158664	250804	158701	158396	143728	111543	annotated
9886874	246	PE(14:0/20:2(11Z,14Z))	C39H74NO8P	158664	250804	158701	158396	143728	111543	annotated
9886875	246	PE(16:0/18:2(9Z,12Z))	C39H74NO8P	158664	250804	158701	158396	143728	111543	annotated
9886876	246	PE(16:1(9Z)/18:1(11Z))	C39H74NO8P	158664	250804	158701	158396	143728	111543	annotated
9886877	246	PE(16:1(9Z)/18:1(9Z))	C39H74NO8P	158664	250804	158701	158396	143728	111543	annotated
9886901	246	PE(17:1(9Z)/17:1(9Z))	C39H74NO8P	158664	250804	158701	158396	143728	111543	annotated
9886902	246	PE(22:2(13Z,16Z)/12:0)	C39H74NO8P	158664	250804	158701	158396	143728	111543	annotated
9886903	246	PC(14:0/17:2(9Z,12Z))	C39H74NO8P	158664	250804	158701	158396	143728	111543	annotated
9886904	246	PC(13:0/18:2(9Z,12Z))	C39H74NO8P	158664	250804	158701	158396	143728	111543	annotated
9886905	246	PC(14:1(9Z)/17:1(9Z))	C39H74NO8P	158664	250804	158701	158396	143728	111543	annotated
9886906	246	PC(17:1(9Z)/14:1(9Z))	C39H74NO8P	158664	250804	158701	158396	143728	111543	annotated
9886907	246	PC(17:2(9Z,12Z)/14:0)	C39H74NO8P	158664	250804	158701	158396	143728	111543	annotated
9886908	246	PC(15:1(9Z)/16:1(9Z))	C39H74NO8P	158664	250804	158701	158396	143728	111543	annotated
9886909	246	PC(16:1(9Z)/15:1(9Z))	C39H74NO8P	158664	250804	158701	158396	143728	111543	annotated
9886910	246	PE(12:0/22:2(13Z,16Z))	C39H74NO8P	158664	250804	158701	158396	143728	111543	annotated
9886911	246	PE(19:1(9Z)/15:1(9Z))	C39H74NO8P	158664	250804	158701	158396	143728	111543	annotated
9886912	246	PE(15:1(9Z)/19:1(9Z))	C39H74NO8P	158664	250804	158701	158396	143728	111543	annotated
9886913	246	PE(17:2(9Z,12Z)/17:0)	C39H74NO8P	158664	250804	158701	158396	143728	111543	annotated
9886914	246	PE(17:0/17:2(9Z,12Z))	C39H74NO8P	158664	250804	158701	158396	143728	111543	annotated
9886915	246	PC(18:2(9Z,12Z)/13:0)	C39H74NO8P	158664	250804	158701	158396	143728	111543	annotated
9886916	247	SM(d18:1/22:1)	C45H89N2O6P	44106.1	52425.4	50662.6	42920.4	48639.1	49577.8	annotated
9886917	247	SM(d16:1/24:1)	C45H89N2O6P	44106.1	52425.4	50662.6	42920.4	48639.1	49577.8	annotated
9886918	247	SM(d18:2/22:0)	C45H89N2O6P	44106.1	52425.4	50662.6	42920.4	48639.1	49577.8	annotated
9886922	248	SM(d17:1/24:1)	C46H91N2O6P	28954.7	39479.7	34297.1	28715.7	32627.2	28565.9	annotated
9886923	248	SM(d18:2/23:0)	C46H91N2O6P	28954.7	39479.7	34297.1	28715.7	32627.2	28565.9	annotated
9886928	250	ATP	C10H16N5O13P3	1.82596e+06	3.50338e+06	3.10897e+06	574398	2.69316e+06	2.55906e+06	annotated
9886929	250	2-Hydroxy-dATP	C10H16N5O13P3	1.82596e+06	3.50338e+06	3.10897e+06	574398	2.69316e+06	2.55906e+06	annotated
9886930	250	dGTP	C10H16N5O13P3	1.82596e+06	3.50338e+06	3.10897e+06	574398	2.69316e+06	2.55906e+06	annotated
9886966	266	4-Hydroxyenterodiol	C18H22O5	1601.45	6809.47	5275.23	2014.09	7609.83	6637.26	annotated
9886967	266	6-Hydroxyenterodiol	C18H22O5	1601.45	6809.47	5275.23	2014.09	7609.83	6637.26	annotated
9886968	266	2-Hydroxyenterodiol	C18H22O5	1601.45	6809.47	5275.23	2014.09	7609.83	6637.26	annotated
9886969	266	(S,E)-Zearalenone	C18H22O5	1601.45	6809.47	5275.23	2014.09	7609.83	6637.26	annotated
9886970	266	Zearalenone	C18H22O5	1601.45	6809.47	5275.23	2014.09	7609.83	6637.26	annotated
9887247	272	Piperidine	C5H11N	1.5299e+06	2.11736e+06	1.15207e+06	2.27945e+06	2099662	1.72782e+06	annotated+fragment
9887250	275	N-Acetylputrescine	C6H14N2O	737728	1.92216e+06	987419	720036	1.60913e+06	772029	annotated+fragment
9887252	275	N-Nitrosodi-n-propylamine	C6H14N2O	737728	1.92216e+06	987419	720036	1.60913e+06	772029	annotated+fragment
9887269	277	PC(P-18:0/16:0)	C42H84NO7P	775281	784964	637428	639473	724561	560887	annotated
9887270	277	PC(P-16:0/18:0)	C42H84NO7P	775281	784964	637428	639473	724561	560887	annotated
9887271	277	PC(18:0/P-16:0)	C42H84NO7P	775281	784964	637428	639473	724561	560887	annotated
9887272	277	PC(O-16:1(9Z)/18:0)	C42H84NO7P	775281	784964	637428	639473	724561	560887	annotated
9887273	277	PC(O-18:1(9Z)/16:0)	C42H84NO7P	775281	784964	637428	639473	724561	560887	annotated
9887274	277	PC(O-18:1(11Z)/16:0)	C42H84NO7P	775281	784964	637428	639473	724561	560887	annotated
9887275	277	PC(16:0/P-18:0)	C42H84NO7P	775281	784964	637428	639473	724561	560887	annotated
9887279	277	PC(O-20:0/14:1(9Z))	C42H84NO7P	775281	784964	637428	639473	724561	560887	annotated
9887280	277	PC(O-16:0/18:1(9Z))	C42H84NO7P	775281	784964	637428	639473	724561	560887	annotated
9887281	277	PC(O-18:0/16:1(9Z))	C42H84NO7P	775281	784964	637428	639473	724561	560887	annotated
9887282	277	PE(P-20:0/17:0)	C42H84NO7P	775281	784964	637428	639473	724561	560887	annotated
9887283	277	PE(P-16:0/21:0)	C42H84NO7P	775281	784964	637428	639473	724561	560887	annotated
9887284	277	PE(P-18:0/19:0)	C42H84NO7P	775281	784964	637428	639473	724561	560887	annotated
9887285	277	PC(P-20:0/14:0)	C42H84NO7P	775281	784964	637428	639473	724561	560887	annotated
9887286	277	PC(P-18:0/16:0)	C42H84NO7P	775281	784964	637428	639473	724561	560887	annotated
9887288	277	PE(O-20:0/17:1(9Z))	C42H84NO7P	775281	784964	637428	639473	724561	560887	annotated
9887289	277	PE(O-18:0/19:1(9Z))	C42H84NO7P	775281	784964	637428	639473	724561	560887	annotated
9887290	280	PC(P-18:1(11Z)/20:0)	C46H90NO7P	26774.5	0	0	29305.9	18838.5	29888.2	annotated
9887291	280	PC(P-18:0/20:1(11Z))	C46H90NO7P	26774.5	0	0	29305.9	18838.5	29888.2	annotated
9887292	280	PC(P-16:0/22:1(13Z))	C46H90NO7P	26774.5	0	0	29305.9	18838.5	29888.2	annotated
9887293	280	PC(P-18:1(9Z)/20:0)	C46H90NO7P	26774.5	0	0	29305.9	18838.5	29888.2	annotated
9887294	280	PC(20:1(11Z)/P-18:0)	C46H90NO7P	26774.5	0	0	29305.9	18838.5	29888.2	annotated
9887295	280	PC(22:1(13Z)/P-16:0)	C46H90NO7P	26774.5	0	0	29305.9	18838.5	29888.2	annotated
9887296	280	PC(20:0/P-18:1(9Z))	C46H90NO7P	26774.5	0	0	29305.9	18838.5	29888.2	annotated
9887297	280	PC(20:0/P-18:1(11Z))	C46H90NO7P	26774.5	0	0	29305.9	18838.5	29888.2	annotated
9887298	280	PC(o-18:1(9Z)/20:1(11Z))	C46H90NO7P	26774.5	0	0	29305.9	18838.5	29888.2	annotated
9887299	280	PC(O-18:2(9Z,12Z)/20:0)	C46H90NO7P	26774.5	0	0	29305.9	18838.5	29888.2	annotated
9887301	280	PC(O-18:0/20:2(11Z,14Z))	C46H90NO7P	26774.5	0	0	29305.9	18838.5	29888.2	annotated
9887302	280	PC(O-20:0/18:2(9Z,12Z))	C46H90NO7P	26774.5	0	0	29305.9	18838.5	29888.2	annotated
9887303	280	PC(O-16:0/22:2(13Z,16Z))	C46H90NO7P	26774.5	0	0	29305.9	18838.5	29888.2	annotated
9887304	280	PC(P-16:0/22:1(11Z))	C46H90NO7P	26774.5	0	0	29305.9	18838.5	29888.2	annotated
9887305	280	PC(P-20:0/18:1(9Z))	C46H90NO7P	26774.5	0	0	29305.9	18838.5	29888.2	annotated
9887306	281	PE(20:1(11Z)/P-18:1(11Z))	C43H82NO7P	25994.2	25633.8	21439.8	28373.8	26226.9	21476.8	annotated
9887307	281	PE(20:1(11Z)/P-18:1(9Z))	C43H82NO7P	25994.2	25633.8	21439.8	28373.8	26226.9	21476.8	annotated
9887308	281	PE(20:2(11Z,14Z)/P-18:0)	C43H82NO7P	25994.2	25633.8	21439.8	28373.8	26226.9	21476.8	annotated
9887309	281	PE(22:2(13Z,16Z)/P-16:0)	C43H82NO7P	25994.2	25633.8	21439.8	28373.8	26226.9	21476.8	annotated
9887310	281	PE(P-16:0/22:2(13Z,16Z))	C43H82NO7P	25994.2	25633.8	21439.8	28373.8	26226.9	21476.8	annotated
9887311	281	PE(P-18:0/20:2(11Z,14Z))	C43H82NO7P	25994.2	25633.8	21439.8	28373.8	26226.9	21476.8	annotated
9887312	281	PE(P-18:1(11Z)/20:1(11Z))	C43H82NO7P	25994.2	25633.8	21439.8	28373.8	26226.9	21476.8	annotated
9887313	281	PE(P-18:1(9Z)/20:1(11Z))	C43H82NO7P	25994.2	25633.8	21439.8	28373.8	26226.9	21476.8	annotated
9887320	281	PE(P-20:0/18:2(9Z,12Z))	C43H82NO7P	25994.2	25633.8	21439.8	28373.8	26226.9	21476.8	annotated
9887321	281	PC(P-18:0/17:2(9Z,12Z))	C43H82NO7P	25994.2	25633.8	21439.8	28373.8	26226.9	21476.8	annotated
9887322	281	PE(O-18:0/20:3(8Z,11Z,14Z))	C43H82NO7P	25994.2	25633.8	21439.8	28373.8	26226.9	21476.8	annotated
9887323	281	PE(O-20:0/18:3(9Z,12Z,15Z))	C43H82NO7P	25994.2	25633.8	21439.8	28373.8	26226.9	21476.8	annotated
9887324	281	PE(O-20:0/18:3(6Z,9Z,12Z))	C43H82NO7P	25994.2	25633.8	21439.8	28373.8	26226.9	21476.8	annotated
9887482	284	SM(d18:1/16:0)	C39H79N2O6P	1.27637e+06	2.0457e+06	1798186	1099772	1578993	1.45111e+06	annotated
9887483	284	SM(d18:0/16:1(9Z))	C39H79N2O6P	1.27637e+06	2.0457e+06	1798186	1099772	1578993	1.45111e+06	annotated
9887484	284	PE-Cer(d15:1(4E)/22:0)	C39H79N2O6P	1.27637e+06	2.0457e+06	1798186	1099772	1578993	1.45111e+06	annotated
9887485	284	PE-Cer(d14:1(4E)/23:0)	C39H79N2O6P	1.27637e+06	2.0457e+06	1798186	1099772	1578993	1.45111e+06	annotated
9887486	284	PE-Cer(d16:1(4E)/21:0)	C39H79N2O6P	1.27637e+06	2.0457e+06	1798186	1099772	1578993	1.45111e+06	annotated
9887487	284	SM(d17:1/17:0)	C39H79N2O6P	1.27637e+06	2.0457e+06	1798186	1099772	1578993	1.45111e+06	annotated
9887488	284	SM(d16:1/18:0)	C39H79N2O6P	1.27637e+06	2.0457e+06	1798186	1099772	1578993	1.45111e+06	annotated
9887509	285	PG(16:0/18:1(9Z))	C40H77O10P	37116.1	51114.7	54498.7	36802.1	50095	39769.8	annotated
9887780	288	PE(20:0/15:0)	C40H80NO8P	1.46269e+06	2040135	1.72521e+06	1.29571e+06	930562	870685	annotated
9887781	288	PC(16:0/16:0)	C40H80NO8P	1.46269e+06	2040135	1.72521e+06	1.29571e+06	930562	870685	annotated
9887782	288	PE(15:0/20:0)	C40H80NO8P	1.46269e+06	2040135	1.72521e+06	1.29571e+06	930562	870685	annotated
9887805	288	PC(18:0/14:0)	C40H80NO8P	1.46269e+06	2040135	1.72521e+06	1.29571e+06	930562	870685	annotated
9887818	288	PC(14:0/18:0)	C40H80NO8P	1.46269e+06	2040135	1.72521e+06	1.29571e+06	930562	870685	annotated
9887821	288	PE(22:0/13:0)	C40H80NO8P	1.46269e+06	2040135	1.72521e+06	1.29571e+06	930562	870685	annotated
9887822	288	PE(21:0/14:0)	C40H80NO8P	1.46269e+06	2040135	1.72521e+06	1.29571e+06	930562	870685	annotated
9887823	288	PE(17:0/18:0)	C40H80NO8P	1.46269e+06	2040135	1.72521e+06	1.29571e+06	930562	870685	annotated
9887824	288	PC(17:0/15:0)	C40H80NO8P	1.46269e+06	2040135	1.72521e+06	1.29571e+06	930562	870685	annotated
9887825	288	PC(20:0/12:0)	C40H80NO8P	1.46269e+06	2040135	1.72521e+06	1.29571e+06	930562	870685	annotated
9887826	288	PC(19:0/13:0)	C40H80NO8P	1.46269e+06	2040135	1.72521e+06	1.29571e+06	930562	870685	annotated
9887827	288	PC(12:0/20:0)	C40H80NO8P	1.46269e+06	2040135	1.72521e+06	1.29571e+06	930562	870685	annotated
9887828	288	PC(11:0/21:0)	C40H80NO8P	1.46269e+06	2040135	1.72521e+06	1.29571e+06	930562	870685	annotated
9887829	288	PC(13:0/19:0)	C40H80NO8P	1.46269e+06	2040135	1.72521e+06	1.29571e+06	930562	870685	annotated
9887830	288	PC(10:0/22:0)	C40H80NO8P	1.46269e+06	2040135	1.72521e+06	1.29571e+06	930562	870685	annotated
9887831	288	PC(15:0/17:0)	C40H80NO8P	1.46269e+06	2040135	1.72521e+06	1.29571e+06	930562	870685	annotated
9887832	288	PC(9:0/23:0)	C40H80NO8P	1.46269e+06	2040135	1.72521e+06	1.29571e+06	930562	870685	annotated
9887833	288	PE(18:0(10(R)Me)/16:0)	C40H80NO8P	1.46269e+06	2040135	1.72521e+06	1.29571e+06	930562	870685	annotated
9887834	288	PC(22:0/10:0)	C40H80NO8P	1.46269e+06	2040135	1.72521e+06	1.29571e+06	930562	870685	annotated
9887835	288	PC(21:0/11:0)	C40H80NO8P	1.46269e+06	2040135	1.72521e+06	1.29571e+06	930562	870685	annotated
9887836	288	PE(19:0/16:0)	C40H80NO8P	1.46269e+06	2040135	1.72521e+06	1.29571e+06	930562	870685	annotated
9887837	288	PE(16:0/19:0)	C40H80NO8P	1.46269e+06	2040135	1.72521e+06	1.29571e+06	930562	870685	annotated
9887838	288	PE(18:0/17:0)	C40H80NO8P	1.46269e+06	2040135	1.72521e+06	1.29571e+06	930562	870685	annotated
9887839	288	PE(13:0/22:0)	C40H80NO8P	1.46269e+06	2040135	1.72521e+06	1.29571e+06	930562	870685	annotated
9887840	288	PE(14:0/21:0)	C40H80NO8P	1.46269e+06	2040135	1.72521e+06	1.29571e+06	930562	870685	annotated
9887841	316	PE(24:1(15Z)/15:0)	C44H86NO8P	726442	831540	658592	622567	558069	473315	annotated
9887842	316	PE(15:0/24:1(15Z))	C44H86NO8P	726442	831540	658592	622567	558069	473315	annotated
9887848	316	PC(22:0/14:1(9Z))	C44H86NO8P	726442	831540	658592	622567	558069	473315	annotated
9887849	316	PC(22:1(13Z)/14:0)	C44H86NO8P	726442	831540	658592	622567	558069	473315	annotated
9887850	316	PC(16:1(9Z)/20:0)	C44H86NO8P	726442	831540	658592	622567	558069	473315	annotated
9887851	316	PC(18:0/18:1(9Z))	C44H86NO8P	726442	831540	658592	622567	558069	473315	annotated
9887852	316	PC(18:0/18:1(11Z))	C44H86NO8P	726442	831540	658592	622567	558069	473315	annotated
9887853	316	PC(18:1(11Z)/18:0)	C44H86NO8P	726442	831540	658592	622567	558069	473315	annotated
9887854	316	PC(18:1(9Z)/18:0)	C44H86NO8P	726442	831540	658592	622567	558069	473315	annotated
9887855	316	PC(20:1(11Z)/16:0)	C44H86NO8P	726442	831540	658592	622567	558069	473315	annotated
9887856	316	PC(20:0/16:1(9Z))	C44H86NO8P	726442	831540	658592	622567	558069	473315	annotated
9887857	316	PC(14:1(9Z)/22:0)	C44H86NO8P	726442	831540	658592	622567	558069	473315	annotated
9887858	316	PC(16:0/20:1(11Z))	C44H86NO8P	726442	831540	658592	622567	558069	473315	annotated
9887869	316	PC(14:0/22:1(13Z))	C44H86NO8P	726442	831540	658592	622567	558069	473315	annotated
9887875	316	PC(22:1(11Z)/14:0)	C44H86NO8P	726442	831540	658592	622567	558069	473315	annotated
9887878	316	PE(22:1(11Z)/17:0)	C44H86NO8P	726442	831540	658592	622567	558069	473315	annotated
9887879	316	PE(22:0/17:1(9Z))	C44H86NO8P	726442	831540	658592	622567	558069	473315	annotated
9887880	316	PC(18:0/18:1(12Z))	C44H86NO8P	726442	831540	658592	622567	558069	473315	annotated
9887881	316	PC(18:0/18:1(16Z))	C44H86NO8P	726442	831540	658592	622567	558069	473315	annotated
9887882	316	PC(18:0/18:1(13Z))	C44H86NO8P	726442	831540	658592	622567	558069	473315	annotated
9887883	316	PC(18:0/18:1(9E))	C44H86NO8P	726442	831540	658592	622567	558069	473315	annotated
9887884	316	PC(18:0/18:1(7Z))	C44H86NO8P	726442	831540	658592	622567	558069	473315	annotated
9887885	316	PC(18:0/18:1(6Z))	C44H86NO8P	726442	831540	658592	622567	558069	473315	annotated
9887886	316	PC(14:0/22:1(11Z))	C44H86NO8P	726442	831540	658592	622567	558069	473315	annotated
9887887	316	PC(17:1(9Z)/19:0)	C44H86NO8P	726442	831540	658592	622567	558069	473315	annotated
9887888	316	PC(17:0/19:1(9Z))	C44H86NO8P	726442	831540	658592	622567	558069	473315	annotated
9887889	316	PC(15:1(9Z)/21:0)	C44H86NO8P	726442	831540	658592	622567	558069	473315	annotated
9887890	316	PE(18:1(9Z)/21:0)	C44H86NO8P	726442	831540	658592	622567	558069	473315	annotated
9887891	316	PE(19:0/20:1(11Z))	C44H86NO8P	726442	831540	658592	622567	558069	473315	annotated
9887892	316	PE(17:0/22:1(11Z))	C44H86NO8P	726442	831540	658592	622567	558069	473315	annotated
9887893	316	PE(17:1(9Z)/22:0)	C44H86NO8P	726442	831540	658592	622567	558069	473315	annotated
9887894	316	PC(19:1(9Z)/17:0)	C44H86NO8P	726442	831540	658592	622567	558069	473315	annotated
9887895	316	PC(19:0/17:1(9Z))	C44H86NO8P	726442	831540	658592	622567	558069	473315	annotated
9887896	316	PE(19:1(9Z)/20:0)	C44H86NO8P	726442	831540	658592	622567	558069	473315	annotated
9887897	316	PE(20:0/19:1(9Z))	C44H86NO8P	726442	831540	658592	622567	558069	473315	annotated
9887898	316	PE(20:1(11Z)/19:0)	C44H86NO8P	726442	831540	658592	622567	558069	473315	annotated
9887899	316	PC(21:0/15:1(9Z))	C44H86NO8P	726442	831540	658592	622567	558069	473315	annotated
9887900	316	PE(21:0/18:1(9Z))	C44H86NO8P	726442	831540	658592	622567	558069	473315	annotated
9888023	326	Cinnamic acid	C9H8O2	5432.93	18070.8	15424.5	8580.79	24694.2	20147.8	annotated
9888024	326	Cinnamic acid	C9H8O2	5432.93	18070.8	15424.5	8580.79	24694.2	20147.8	annotated
9888025	326	Pyruvophenone	C9H8O2	5432.93	18070.8	15424.5	8580.79	24694.2	20147.8	annotated
9888026	326	4-Hydroxycinnamyl aldehyde	C9H8O2	5432.93	18070.8	15424.5	8580.79	24694.2	20147.8	annotated
9888027	326	3,4-Dihydro-2H-1-benzopyran-2-one	C9H8O2	5432.93	18070.8	15424.5	8580.79	24694.2	20147.8	annotated
9888028	326	(E)-3-(2-Hydroxyphenyl)-2-propenal	C9H8O2	5432.93	18070.8	15424.5	8580.79	24694.2	20147.8	annotated
9888029	326	Di-2-furanylmethane	C9H8O2	5432.93	18070.8	15424.5	8580.79	24694.2	20147.8	annotated
9888030	326	3-Isochromanone	C9H8O2	5432.93	18070.8	15424.5	8580.79	24694.2	20147.8	annotated
9888031	326	3-Hydroxy-1-indanone	C9H8O2	5432.93	18070.8	15424.5	8580.79	24694.2	20147.8	annotated
9888032	327	2-Aminonaphthalene	C10H9N	4396.92	9444.08	8897.12	4892.57	14678.5	13562.7	annotated
9888033	327	6-Methylquinoline	C10H9N	4396.92	9444.08	8897.12	4892.57	14678.5	13562.7	annotated
9888034	327	Quinaldine	C10H9N	4396.92	9444.08	8897.12	4892.57	14678.5	13562.7	annotated
9888035	327	1-Naphthylamine	C10H9N	4396.92	9444.08	8897.12	4892.57	14678.5	13562.7	annotated
9888079	338	PA(P-20:0/18:4(6Z,9Z,12Z,15Z))	C41H73O7P	6267.29	6677.1	5370.07	5994.83	8148.28	6863.25	annotated
9888080	338	PA(P-18:0/20:4(5Z,8Z,11Z,14Z))	C41H73O7P	6267.29	6677.1	5370.07	5994.83	8148.28	6863.25	annotated
9888082	338	PA(P-16:0/22:4(7Z,10Z,13Z,16Z))	C41H73O7P	6267.29	6677.1	5370.07	5994.83	8148.28	6863.25	annotated
9888133	352	L-Noradrenaline	C8H11NO3	318337	1451127	1.62289e+06	212312	1.15254e+06	1.25553e+06	annotated+fragment
9888134	352	Pyridoxine	C8H11NO3	318337	1451127	1.62289e+06	212312	1.15254e+06	1.25553e+06	identified+fragment
9888135	352	5-Hydroxydopamine	C8H11NO3	318337	1451127	1.62289e+06	212312	1.15254e+06	1.25553e+06	annotated+fragment
9888137	352	6-Acetyl-2,3-dihydro-2-(hydroxymethyl)-4(1H)-pyridinone	C8H11NO3	318337	1451127	1.62289e+06	212312	1.15254e+06	1.25553e+06	annotated+fragment
9888138	352	6-Hydroxydopamine	C8H11NO3	318337	1451127	1.62289e+06	212312	1.15254e+06	1.25553e+06	annotated+fragment
9888146	352	xi-Norepinephrine	C8H11NO3	318337	1451127	1.62289e+06	212312	1.15254e+06	1.25553e+06	annotated+fragment
9888159	353	N-Acetylisoniazid	C8H9N3O2	9287.4	46272.2	48077.9	11574.9	37259.9	22529.2	annotated
9888171	359	Suprofen S-oxide	C14H12O4S	35414.8	40202.3	38881	25318.6	37215	36776	annotated
9888172	359	Thiophene-4,5-epoxide	C14H12O4S	35414.8	40202.3	38881	25318.6	37215	36776	annotated
9888173	361	Pyrrolidine	C4H9N	324921	804828	712915	388823	1.10665e+06	1.06589e+06	annotated
9888174	361	3-Buten-1-amine	C4H9N	324921	804828	712915	388823	1.10665e+06	1.06589e+06	annotated
9888196	365	1-Amino-2-methylanthraquinone	C15H11NO2	3480.03	4909.42	6256.22	4025.59	7778.2	7066.54	annotated
9888198	365	2,3-Bis(p-hydroxyphenyl)acrylonitrile	C15H11NO2	3480.03	4909.42	6256.22	4025.59	7778.2	7066.54	annotated
9888199	365	N-Benzylphthalimide	C15H11NO2	3480.03	4909.42	6256.22	4025.59	7778.2	7066.54	annotated
9888217	368	5'-Methylthioadenosine	C11H15N5O3S	43356.9	50163.2	41450.9	68834.5	41480.9	30177.9	annotated
9888218	369	PC(P-18:0/14:0)	C40H80NO7P	6791.1	26776.3	12444.5	7191.23	9451.45	7095.65	annotated
9888219	369	PC(P-16:0/16:0)	C40H80NO7P	6791.1	26776.3	12444.5	7191.23	9451.45	7095.65	annotated
9888221	369	PC(o-16:0/16:1(9Z))	C40H80NO7P	6791.1	26776.3	12444.5	7191.23	9451.45	7095.65	annotated
9888222	369	PC(16:0/P-16:0)	C40H80NO7P	6791.1	26776.3	12444.5	7191.23	9451.45	7095.65	annotated
9888223	369	PC(14:0/P-18:0)	C40H80NO7P	6791.1	26776.3	12444.5	7191.23	9451.45	7095.65	annotated
9888224	369	PC(14:0/P-18:0)	C40H80NO7P	6791.1	26776.3	12444.5	7191.23	9451.45	7095.65	annotated
9888225	369	PC(16:0/P-16:0)	C40H80NO7P	6791.1	26776.3	12444.5	7191.23	9451.45	7095.65	annotated
9888229	369	PC(O-18:0/14:1(9Z))	C40H80NO7P	6791.1	26776.3	12444.5	7191.23	9451.45	7095.65	annotated
9888230	369	PC(O-14:0/18:1(9Z))	C40H80NO7P	6791.1	26776.3	12444.5	7191.23	9451.45	7095.65	annotated
9888231	369	PE(P-16:0/19:0)	C40H80NO7P	6791.1	26776.3	12444.5	7191.23	9451.45	7095.65	annotated
9888232	369	PE(P-20:0/15:0)	C40H80NO7P	6791.1	26776.3	12444.5	7191.23	9451.45	7095.65	annotated
9888233	369	PE(P-18:0/17:0)	C40H80NO7P	6791.1	26776.3	12444.5	7191.23	9451.45	7095.65	annotated
9888234	369	PC(P-20:0/12:0)	C40H80NO7P	6791.1	26776.3	12444.5	7191.23	9451.45	7095.65	annotated
9888235	369	PE(O-18:0/17:1(9Z))	C40H80NO7P	6791.1	26776.3	12444.5	7191.23	9451.45	7095.65	annotated
9888236	369	PE(O-16:0/19:1(9Z))	C40H80NO7P	6791.1	26776.3	12444.5	7191.23	9451.45	7095.65	annotated
9888237	369	PE(O-20:0/15:1(9Z))	C40H80NO7P	6791.1	26776.3	12444.5	7191.23	9451.45	7095.65	annotated
9888291	374	N(pi)-Methyl-L-histidine	C7H11N3O2	270994	745031	723844	226849	640042	384121	identified+fragment
9888293	374	1-Methylhistidine	C7H11N3O2	270994	745031	723844	226849	640042	384121	annotated+fragment
9888299	374	Nalpha-Methylhistidine	C7H11N3O2	270994	745031	723844	226849	640042	384121	annotated+fragment
9888301	375	Isoleucyl-Alanine	C9H18N2O3	30329.3	33828.4	38115.6	24257	24538.2	25716.8	annotated
9888302	375	Leucyl-Alanine	C9H18N2O3	30329.3	33828.4	38115.6	24257	24538.2	25716.8	annotated
9888303	375	Alanyl-Isoleucine	C9H18N2O3	30329.3	33828.4	38115.6	24257	24538.2	25716.8	annotated
9888304	375	Alanyl-Leucine	C9H18N2O3	30329.3	33828.4	38115.6	24257	24538.2	25716.8	annotated
9888317	378	PS(18:0/18:1(9Z))	C42H80NO10P	1248726	1.18436e+06	995888	1.12932e+06	963426	1.03538e+06	annotated
9888318	378	PS(18:1(9Z)/18:0)	C42H80NO10P	1248726	1.18436e+06	995888	1.12932e+06	963426	1.03538e+06	annotated
9888320	378	PS(14:0/22:1(11Z))	C42H80NO10P	1248726	1.18436e+06	995888	1.12932e+06	963426	1.03538e+06	annotated
9888321	378	PS(14:1(9Z)/22:0)	C42H80NO10P	1248726	1.18436e+06	995888	1.12932e+06	963426	1.03538e+06	annotated
9888322	378	PS(15:1(9Z)/21:0)	C42H80NO10P	1248726	1.18436e+06	995888	1.12932e+06	963426	1.03538e+06	annotated
9888323	378	PS(16:1(9Z)/20:0)	C42H80NO10P	1248726	1.18436e+06	995888	1.12932e+06	963426	1.03538e+06	annotated
9888324	378	PS(17:0/19:1(9Z))	C42H80NO10P	1248726	1.18436e+06	995888	1.12932e+06	963426	1.03538e+06	annotated
9888325	378	PS(17:1(9Z)/19:0)	C42H80NO10P	1248726	1.18436e+06	995888	1.12932e+06	963426	1.03538e+06	annotated
9888326	378	PS(19:0/17:1(9Z))	C42H80NO10P	1248726	1.18436e+06	995888	1.12932e+06	963426	1.03538e+06	annotated
9888327	378	PS(19:1(9Z)/17:0)	C42H80NO10P	1248726	1.18436e+06	995888	1.12932e+06	963426	1.03538e+06	annotated
9888328	378	PS(20:0/16:1(9Z))	C42H80NO10P	1248726	1.18436e+06	995888	1.12932e+06	963426	1.03538e+06	annotated
9888329	378	PS(20:1(11Z)/16:0)	C42H80NO10P	1248726	1.18436e+06	995888	1.12932e+06	963426	1.03538e+06	annotated
9888330	378	PS(21:0/15:1(9Z))	C42H80NO10P	1248726	1.18436e+06	995888	1.12932e+06	963426	1.03538e+06	annotated
9888331	378	PS(22:0/14:1(9Z))	C42H80NO10P	1248726	1.18436e+06	995888	1.12932e+06	963426	1.03538e+06	annotated
9888332	378	PS(22:1(11Z)/14:0)	C42H80NO10P	1248726	1.18436e+06	995888	1.12932e+06	963426	1.03538e+06	annotated
9888333	378	PS(16:0/20:1(11Z))	C42H80NO10P	1248726	1.18436e+06	995888	1.12932e+06	963426	1.03538e+06	annotated
9888370	380	PI(18:2(9Z,12Z)/20:1(11Z))	C47H85O13P	39934.4	39059.7	40039.6	43978.4	42206.1	44349.9	annotated
9888373	380	PI(18:0/20:3(5Z,8Z,11Z))	C47H85O13P	39934.4	39059.7	40039.6	43978.4	42206.1	44349.9	annotated
9888374	380	PI(18:0/20:3(8Z,11Z,14Z))	C47H85O13P	39934.4	39059.7	40039.6	43978.4	42206.1	44349.9	annotated
9888375	380	PI(16:0/22:3(10Z,13Z,16Z))	C47H85O13P	39934.4	39059.7	40039.6	43978.4	42206.1	44349.9	annotated
9888377	380	PI(22:3(10Z,13Z,16Z)/16:0)	C47H85O13P	39934.4	39059.7	40039.6	43978.4	42206.1	44349.9	annotated
9888378	380	PI(20:1(11Z)/18:2(9Z,12Z))	C47H85O13P	39934.4	39059.7	40039.6	43978.4	42206.1	44349.9	annotated
9888379	380	PI(20:3(5Z,8Z,11Z)/18:0)	C47H85O13P	39934.4	39059.7	40039.6	43978.4	42206.1	44349.9	annotated
9888380	380	PI(20:3(8Z,11Z,14Z)/18:0)	C47H85O13P	39934.4	39059.7	40039.6	43978.4	42206.1	44349.9	annotated
9888395	380	PI(22:2(13Z,16Z)/16:1(9Z))	C47H85O13P	39934.4	39059.7	40039.6	43978.4	42206.1	44349.9	annotated
9888397	380	PI(20:2(11Z,14Z)/18:1(9Z))	C47H85O13P	39934.4	39059.7	40039.6	43978.4	42206.1	44349.9	annotated
9888399	380	PI(20:0/18:3(6Z,9Z,12Z))	C47H85O13P	39934.4	39059.7	40039.6	43978.4	42206.1	44349.9	annotated
9888400	380	PI(20:0/18:3(9Z,12Z,15Z))	C47H85O13P	39934.4	39059.7	40039.6	43978.4	42206.1	44349.9	annotated
9888401	380	PI(18:1(9Z)/20:2(11Z,14Z))	C47H85O13P	39934.4	39059.7	40039.6	43978.4	42206.1	44349.9	annotated
9888402	380	PI(18:3(9Z,12Z,15Z)/20:0)	C47H85O13P	39934.4	39059.7	40039.6	43978.4	42206.1	44349.9	annotated
9888403	380	PI(18:3(6Z,9Z,12Z)/20:0)	C47H85O13P	39934.4	39059.7	40039.6	43978.4	42206.1	44349.9	annotated
9888405	380	PI(16:1(9Z)/22:2(13Z,16Z))	C47H85O13P	39934.4	39059.7	40039.6	43978.4	42206.1	44349.9	annotated
9888406	381	PS(15:0/22:2(13Z,16Z))	C43H80NO10P	43163.6	26061.5	28635.5	37912.2	26449.5	25683.7	annotated
9888407	381	PS(15:1(9Z)/22:1(11Z))	C43H80NO10P	43163.6	26061.5	28635.5	37912.2	26449.5	25683.7	annotated
9888408	381	PS(17:0/20:2(11Z,14Z))	C43H80NO10P	43163.6	26061.5	28635.5	37912.2	26449.5	25683.7	annotated
9888409	381	PS(17:1(9Z)/20:1(11Z))	C43H80NO10P	43163.6	26061.5	28635.5	37912.2	26449.5	25683.7	annotated
9888410	381	PS(17:2(9Z,12Z)/20:0)	C43H80NO10P	43163.6	26061.5	28635.5	37912.2	26449.5	25683.7	annotated
9888411	381	PS(18:1(9Z)/19:1(9Z))	C43H80NO10P	43163.6	26061.5	28635.5	37912.2	26449.5	25683.7	annotated
9888412	381	PS(18:2(9Z,12Z)/19:0)	C43H80NO10P	43163.6	26061.5	28635.5	37912.2	26449.5	25683.7	annotated
9888413	381	PS(19:0/18:2(9Z,12Z))	C43H80NO10P	43163.6	26061.5	28635.5	37912.2	26449.5	25683.7	annotated
9888414	381	PS(19:1(9Z)/18:1(9Z))	C43H80NO10P	43163.6	26061.5	28635.5	37912.2	26449.5	25683.7	annotated
9888415	381	PS(20:0/17:2(9Z,12Z))	C43H80NO10P	43163.6	26061.5	28635.5	37912.2	26449.5	25683.7	annotated
9888416	381	PS(20:1(11Z)/17:1(9Z))	C43H80NO10P	43163.6	26061.5	28635.5	37912.2	26449.5	25683.7	annotated
9888417	381	PS(20:2(11Z,14Z)/17:0)	C43H80NO10P	43163.6	26061.5	28635.5	37912.2	26449.5	25683.7	annotated
9888418	381	PS(22:1(11Z)/15:1(9Z))	C43H80NO10P	43163.6	26061.5	28635.5	37912.2	26449.5	25683.7	annotated
9888419	381	PS(22:2(13Z,16Z)/15:0)	C43H80NO10P	43163.6	26061.5	28635.5	37912.2	26449.5	25683.7	annotated
9888451	382	PS(20:1(11Z)/22:6(4Z,7Z,10Z,13Z,16Z,19Z))	C48H80NO10P	11445.2	9938.88	13789	9287.51	8692.87	10789.7	annotated
9888454	382	PS(20:3(8Z,11Z,14Z)/22:4(7Z,10Z,13Z,16Z))	C48H80NO10P	11445.2	9938.88	13789	9287.51	8692.87	10789.7	annotated
9888456	382	PS(20:5(5Z,8Z,11Z,14Z,17Z)/22:2(13Z,16Z))	C48H80NO10P	11445.2	9938.88	13789	9287.51	8692.87	10789.7	annotated
9888461	382	PS(22:2(13Z,16Z)/20:5(5Z,8Z,11Z,14Z,17Z))	C48H80NO10P	11445.2	9938.88	13789	9287.51	8692.87	10789.7	annotated
9888463	382	PS(22:4(7Z,10Z,13Z,16Z)/20:3(8Z,11Z,14Z))	C48H80NO10P	11445.2	9938.88	13789	9287.51	8692.87	10789.7	annotated
9888464	382	PS(22:6(4Z,7Z,10Z,13Z,16Z,19Z)/20:1(11Z))	C48H80NO10P	11445.2	9938.88	13789	9287.51	8692.87	10789.7	annotated
9888507	385	PI(18:2(9Z,12Z)/22:3(10Z,13Z,16Z))	C49H85O13P	6715.61	8747.57	7885.23	6418.04	6571.1	9452.11	annotated
9888510	385	PI(18:0/22:5(4Z,7Z,10Z,13Z,16Z))	C49H85O13P	6715.61	8747.57	7885.23	6418.04	6571.1	9452.11	annotated
9888511	385	PI(18:0/22:5(7Z,10Z,13Z,16Z,19Z))	C49H85O13P	6715.61	8747.57	7885.23	6418.04	6571.1	9452.11	annotated
9888514	385	PI(20:4(8Z,11Z,14Z,17Z)/20:1(11Z))	C49H85O13P	6715.61	8747.57	7885.23	6418.04	6571.1	9452.11	annotated
9888516	385	PI(22:3(10Z,13Z,16Z)/18:2(9Z,12Z))	C49H85O13P	6715.61	8747.57	7885.23	6418.04	6571.1	9452.11	annotated
9888517	385	PI(22:5(4Z,7Z,10Z,13Z,16Z)/18:0)	C49H85O13P	6715.61	8747.57	7885.23	6418.04	6571.1	9452.11	annotated
9888518	385	PI(22:5(7Z,10Z,13Z,16Z,19Z)/18:0)	C49H85O13P	6715.61	8747.57	7885.23	6418.04	6571.1	9452.11	annotated
9888521	385	PI(20:1(11Z)/20:4(5Z,8Z,11Z,14Z))	C49H85O13P	6715.61	8747.57	7885.23	6418.04	6571.1	9452.11	annotated
9888522	385	PI(20:1(11Z)/20:4(8Z,11Z,14Z,17Z))	C49H85O13P	6715.61	8747.57	7885.23	6418.04	6571.1	9452.11	annotated
9888524	385	PI(20:4(5Z,8Z,11Z,14Z)/20:1(11Z))	C49H85O13P	6715.61	8747.57	7885.23	6418.04	6571.1	9452.11	annotated
9888525	385	PI(22:4(7Z,10Z,13Z,16Z)/18:1(9Z))	C49H85O13P	6715.61	8747.57	7885.23	6418.04	6571.1	9452.11	annotated
9888526	385	PI(22:2(13Z,16Z)/18:3(6Z,9Z,12Z))	C49H85O13P	6715.61	8747.57	7885.23	6418.04	6571.1	9452.11	annotated
9888527	385	PI(22:2(13Z,16Z)/18:3(9Z,12Z,15Z))	C49H85O13P	6715.61	8747.57	7885.23	6418.04	6571.1	9452.11	annotated
9888528	385	PI(22:1(11Z)/18:4(6Z,9Z,12Z,15Z))	C49H85O13P	6715.61	8747.57	7885.23	6418.04	6571.1	9452.11	annotated
9888531	385	PI(20:5(5Z,8Z,11Z,14Z,17Z)/20:0)	C49H85O13P	6715.61	8747.57	7885.23	6418.04	6571.1	9452.11	annotated
9888532	385	PI(20:3(8Z,11Z,14Z)/20:2(11Z,14Z))	C49H85O13P	6715.61	8747.57	7885.23	6418.04	6571.1	9452.11	annotated
9888533	385	PI(20:2(11Z,14Z)/20:3(8Z,11Z,14Z))	C49H85O13P	6715.61	8747.57	7885.23	6418.04	6571.1	9452.11	annotated
9888535	385	PI(18:4(6Z,9Z,12Z,15Z)/22:1(11Z))	C49H85O13P	6715.61	8747.57	7885.23	6418.04	6571.1	9452.11	annotated
9888536	385	PI(20:0/20:5(5Z,8Z,11Z,14Z,17Z))	C49H85O13P	6715.61	8747.57	7885.23	6418.04	6571.1	9452.11	annotated
9888537	385	PI(18:1(9Z)/22:4(7Z,10Z,13Z,16Z))	C49H85O13P	6715.61	8747.57	7885.23	6418.04	6571.1	9452.11	annotated
9888538	385	PI(18:3(9Z,12Z,15Z)/22:2(13Z,16Z))	C49H85O13P	6715.61	8747.57	7885.23	6418.04	6571.1	9452.11	annotated
9888539	385	PI(18:3(6Z,9Z,12Z)/22:2(13Z,16Z))	C49H85O13P	6715.61	8747.57	7885.23	6418.04	6571.1	9452.11	annotated
9888542	386	Uridine triphosphate	C9H15N2O15P3	367438	1.18583e+06	1.20871e+06	153046	607008	707412	annotated
9888543	404	Hypoxanthine	C5H4N4O	27378	75964.9	103227	391389	54245.2	62749.1	identified+fragment
9888544	404	Allopurinol	C5H4N4O	27378	75964.9	103227	391389	54245.2	62749.1	annotated+fragment
9888545	405	PE(20:0/16:1(9Z))	C41H80NO8P	960055	1.17113e+06	1.14732e+06	944075	1.15586e+06	1.01936e+06	annotated
9888546	405	PE(20:1(11Z)/16:0)	C41H80NO8P	960055	1.17113e+06	1.14732e+06	944075	1.15586e+06	1.01936e+06	annotated
9888547	405	PE(22:0/14:1(9Z))	C41H80NO8P	960055	1.17113e+06	1.14732e+06	944075	1.15586e+06	1.01936e+06	annotated
9888548	405	PE-NMe2(16:0/18:1(9Z))	C41H80NO8P	960055	1.17113e+06	1.14732e+06	944075	1.15586e+06	1.01936e+06	annotated
9888549	405	PE(22:1(13Z)/14:0)	C41H80NO8P	960055	1.17113e+06	1.14732e+06	944075	1.15586e+06	1.01936e+06	annotated
9888550	405	PE(18:1(9Z)/18:0)	C41H80NO8P	960055	1.17113e+06	1.14732e+06	944075	1.15586e+06	1.01936e+06	annotated
9888551	405	PE(18:1(11Z)/18:0)	C41H80NO8P	960055	1.17113e+06	1.14732e+06	944075	1.15586e+06	1.01936e+06	annotated
9888552	405	PE(14:1(9Z)/22:0)	C41H80NO8P	960055	1.17113e+06	1.14732e+06	944075	1.15586e+06	1.01936e+06	annotated
9888553	405	PE(14:0/22:1(13Z))	C41H80NO8P	960055	1.17113e+06	1.14732e+06	944075	1.15586e+06	1.01936e+06	annotated
9888554	405	PE(16:0/20:1(11Z))	C41H80NO8P	960055	1.17113e+06	1.14732e+06	944075	1.15586e+06	1.01936e+06	annotated
9888555	405	PE(18:0/18:1(11Z))	C41H80NO8P	960055	1.17113e+06	1.14732e+06	944075	1.15586e+06	1.01936e+06	annotated
9888556	405	PE(18:0/18:1(9Z))	C41H80NO8P	960055	1.17113e+06	1.14732e+06	944075	1.15586e+06	1.01936e+06	annotated
9888557	405	PE(16:1(9Z)/20:0)	C41H80NO8P	960055	1.17113e+06	1.14732e+06	944075	1.15586e+06	1.01936e+06	annotated
9888560	405	PC(18:1(9Z)/15:0)	C41H80NO8P	960055	1.17113e+06	1.14732e+06	944075	1.15586e+06	1.01936e+06	annotated
9888561	405	PC(18:1(11Z)/15:0)	C41H80NO8P	960055	1.17113e+06	1.14732e+06	944075	1.15586e+06	1.01936e+06	annotated
9888562	405	PC(15:0/18:1(9Z))	C41H80NO8P	960055	1.17113e+06	1.14732e+06	944075	1.15586e+06	1.01936e+06	annotated
9888563	405	PC(15:0/18:1(11Z))	C41H80NO8P	960055	1.17113e+06	1.14732e+06	944075	1.15586e+06	1.01936e+06	annotated
9888575	405	PE(22:1(11Z)/14:0)	C41H80NO8P	960055	1.17113e+06	1.14732e+06	944075	1.15586e+06	1.01936e+06	annotated
9888576	405	PC(16:0/17:1(9Z))	C41H80NO8P	960055	1.17113e+06	1.14732e+06	944075	1.15586e+06	1.01936e+06	annotated
9888577	405	PC(14:0/19:1(9Z))	C41H80NO8P	960055	1.17113e+06	1.14732e+06	944075	1.15586e+06	1.01936e+06	annotated
9888578	405	PC(13:0/20:1(11Z))	C41H80NO8P	960055	1.17113e+06	1.14732e+06	944075	1.15586e+06	1.01936e+06	annotated
9888579	405	PC(14:1(9Z)/19:0)	C41H80NO8P	960055	1.17113e+06	1.14732e+06	944075	1.15586e+06	1.01936e+06	annotated
9888580	405	PC(17:1(9Z)/16:0)	C41H80NO8P	960055	1.17113e+06	1.14732e+06	944075	1.15586e+06	1.01936e+06	annotated
9888581	405	PC(17:0/16:1(9Z))	C41H80NO8P	960055	1.17113e+06	1.14732e+06	944075	1.15586e+06	1.01936e+06	annotated
9888582	405	PC(18:0/15:1(9Z))	C41H80NO8P	960055	1.17113e+06	1.14732e+06	944075	1.15586e+06	1.01936e+06	annotated
9888583	405	PC(15:1(9Z)/18:0)	C41H80NO8P	960055	1.17113e+06	1.14732e+06	944075	1.15586e+06	1.01936e+06	annotated
9888584	405	PC(16:1(9Z)/17:0)	C41H80NO8P	960055	1.17113e+06	1.14732e+06	944075	1.15586e+06	1.01936e+06	annotated
9888585	405	PE(18:0/18:1(7Z))	C41H80NO8P	960055	1.17113e+06	1.14732e+06	944075	1.15586e+06	1.01936e+06	annotated
9888586	405	PE-NMe2(18:1(9Z)/16:0)	C41H80NO8P	960055	1.17113e+06	1.14732e+06	944075	1.15586e+06	1.01936e+06	annotated
9888587	405	PE(19:0/17:1(9Z))	C41H80NO8P	960055	1.17113e+06	1.14732e+06	944075	1.15586e+06	1.01936e+06	annotated
9888588	405	PE(15:1(9Z)/21:0)	C41H80NO8P	960055	1.17113e+06	1.14732e+06	944075	1.15586e+06	1.01936e+06	annotated
9888589	405	PE(14:0/22:1(11Z))	C41H80NO8P	960055	1.17113e+06	1.14732e+06	944075	1.15586e+06	1.01936e+06	annotated
9888590	405	PE(17:0/19:1(9Z))	C41H80NO8P	960055	1.17113e+06	1.14732e+06	944075	1.15586e+06	1.01936e+06	annotated
9888591	405	PE(17:1(9Z)/19:0)	C41H80NO8P	960055	1.17113e+06	1.14732e+06	944075	1.15586e+06	1.01936e+06	annotated
9888592	405	PC(19:1(9Z)/14:0)	C41H80NO8P	960055	1.17113e+06	1.14732e+06	944075	1.15586e+06	1.01936e+06	annotated
9888593	405	PC(19:0/14:1(9Z))	C41H80NO8P	960055	1.17113e+06	1.14732e+06	944075	1.15586e+06	1.01936e+06	annotated
9888594	405	PE(19:1(9Z)/17:0)	C41H80NO8P	960055	1.17113e+06	1.14732e+06	944075	1.15586e+06	1.01936e+06	annotated
9888595	405	PE(21:0/15:1(9Z))	C41H80NO8P	960055	1.17113e+06	1.14732e+06	944075	1.15586e+06	1.01936e+06	annotated
9888596	405	PC(20:1(11Z)/13:0)	C41H80NO8P	960055	1.17113e+06	1.14732e+06	944075	1.15586e+06	1.01936e+06	annotated
9888597	408	PE(22:6(4Z,7Z,10Z,13Z,16Z,19Z)/18:1(11Z))	C45H76NO8P	52012.6	70494.5	94037.7	41590.7	56304.3	64014.1	annotated
9888598	408	PE(22:6(4Z,7Z,10Z,13Z,16Z,19Z)/18:1(9Z))	C45H76NO8P	52012.6	70494.5	94037.7	41590.7	56304.3	64014.1	annotated
9888599	408	PE(22:5(7Z,10Z,13Z,16Z,19Z)/18:2(9Z,12Z))	C45H76NO8P	52012.6	70494.5	94037.7	41590.7	56304.3	64014.1	annotated
9888600	408	PE(20:3(5Z,8Z,11Z)/20:4(5Z,8Z,11Z,14Z))	C45H76NO8P	52012.6	70494.5	94037.7	41590.7	56304.3	64014.1	annotated
9888601	408	PE(20:3(5Z,8Z,11Z)/20:4(8Z,11Z,14Z,17Z))	C45H76NO8P	52012.6	70494.5	94037.7	41590.7	56304.3	64014.1	annotated
9888602	408	PE(20:2(11Z,14Z)/20:5(5Z,8Z,11Z,14Z,17Z))	C45H76NO8P	52012.6	70494.5	94037.7	41590.7	56304.3	64014.1	annotated
9888603	408	PE(20:4(5Z,8Z,11Z,14Z)/20:3(5Z,8Z,11Z))	C45H76NO8P	52012.6	70494.5	94037.7	41590.7	56304.3	64014.1	annotated
9888604	408	PE(20:4(5Z,8Z,11Z,14Z)/20:3(8Z,11Z,14Z))	C45H76NO8P	52012.6	70494.5	94037.7	41590.7	56304.3	64014.1	annotated
9888605	408	PE(20:3(8Z,11Z,14Z)/20:4(5Z,8Z,11Z,14Z))	C45H76NO8P	52012.6	70494.5	94037.7	41590.7	56304.3	64014.1	annotated
9888606	408	PE(20:3(8Z,11Z,14Z)/20:4(8Z,11Z,14Z,17Z))	C45H76NO8P	52012.6	70494.5	94037.7	41590.7	56304.3	64014.1	annotated
9888607	408	PE(20:4(8Z,11Z,14Z,17Z)/20:3(5Z,8Z,11Z))	C45H76NO8P	52012.6	70494.5	94037.7	41590.7	56304.3	64014.1	annotated
9888608	408	PE(20:4(8Z,11Z,14Z,17Z)/20:3(8Z,11Z,14Z))	C45H76NO8P	52012.6	70494.5	94037.7	41590.7	56304.3	64014.1	annotated
9888609	408	PE(20:5(5Z,8Z,11Z,14Z,17Z)/20:2(11Z,14Z))	C45H76NO8P	52012.6	70494.5	94037.7	41590.7	56304.3	64014.1	annotated
9888610	408	PE(22:5(4Z,7Z,10Z,13Z,16Z)/18:2(9Z,12Z))	C45H76NO8P	52012.6	70494.5	94037.7	41590.7	56304.3	64014.1	annotated
9888611	408	PE(22:4(7Z,10Z,13Z,16Z)/18:3(6Z,9Z,12Z))	C45H76NO8P	52012.6	70494.5	94037.7	41590.7	56304.3	64014.1	annotated
9888612	408	PE(22:4(7Z,10Z,13Z,16Z)/18:3(9Z,12Z,15Z))	C45H76NO8P	52012.6	70494.5	94037.7	41590.7	56304.3	64014.1	annotated
9888613	408	PE(18:1(9Z)/22:6(4Z,7Z,10Z,13Z,16Z,19Z))	C45H76NO8P	52012.6	70494.5	94037.7	41590.7	56304.3	64014.1	annotated
9888614	408	PE(18:1(11Z)/22:6(4Z,7Z,10Z,13Z,16Z,19Z))	C45H76NO8P	52012.6	70494.5	94037.7	41590.7	56304.3	64014.1	annotated
9888615	408	PE(18:2(9Z,12Z)/22:5(4Z,7Z,10Z,13Z,16Z))	C45H76NO8P	52012.6	70494.5	94037.7	41590.7	56304.3	64014.1	annotated
9888616	408	PE(18:3(9Z,12Z,15Z)/22:4(7Z,10Z,13Z,16Z))	C45H76NO8P	52012.6	70494.5	94037.7	41590.7	56304.3	64014.1	annotated
9888617	408	PE(18:2(9Z,12Z)/22:5(7Z,10Z,13Z,16Z,19Z))	C45H76NO8P	52012.6	70494.5	94037.7	41590.7	56304.3	64014.1	annotated
9888618	408	PE(18:3(6Z,9Z,12Z)/22:4(7Z,10Z,13Z,16Z))	C45H76NO8P	52012.6	70494.5	94037.7	41590.7	56304.3	64014.1	annotated
9888630	408	PC(22:6(4Z,7Z,10Z,13Z,16Z,19Z)/15:1(9Z))	C45H76NO8P	52012.6	70494.5	94037.7	41590.7	56304.3	64014.1	annotated
9888631	408	PC(17:2(9Z,12Z)/20:5(5Z,8Z,11Z,14Z,17Z))	C45H76NO8P	52012.6	70494.5	94037.7	41590.7	56304.3	64014.1	annotated
9888632	408	PC(15:1(9Z)/22:6(4Z,7Z,10Z,13Z,16Z,19Z))	C45H76NO8P	52012.6	70494.5	94037.7	41590.7	56304.3	64014.1	annotated
9888633	408	PC(20:5(5Z,8Z,11Z,14Z,17Z)/17:2(9Z,12Z))	C45H76NO8P	52012.6	70494.5	94037.7	41590.7	56304.3	64014.1	annotated
9888634	409	SM(d18:2/24:1)	C47H91N2O6P	41814.7	58464.7	53231.2	38229.7	65023.2	52167.6	annotated
9888637	410	PC(20:3(5Z,8Z,11Z)/16:1(9Z))	C44H80NO8P	577538	1.07517e+06	1.06239e+06	635965	1.16263e+06	1.02235e+06	annotated
9888638	410	PC(20:3(8Z,11Z,14Z)/16:1(9Z))	C44H80NO8P	577538	1.07517e+06	1.06239e+06	635965	1.16263e+06	1.02235e+06	annotated
9888639	410	PC(20:4(5Z,8Z,11Z,14Z)/16:0)	C44H80NO8P	577538	1.07517e+06	1.06239e+06	635965	1.16263e+06	1.02235e+06	annotated
9888640	410	PC(20:4(8Z,11Z,14Z,17Z)/16:0)	C44H80NO8P	577538	1.07517e+06	1.06239e+06	635965	1.16263e+06	1.02235e+06	annotated
9888641	410	PC(22:4(7Z,10Z,13Z,16Z)/14:0)	C44H80NO8P	577538	1.07517e+06	1.06239e+06	635965	1.16263e+06	1.02235e+06	annotated
9888642	410	PC(16:1(9Z)/20:3(8Z,11Z,14Z))	C44H80NO8P	577538	1.07517e+06	1.06239e+06	635965	1.16263e+06	1.02235e+06	annotated
9888643	410	PC(16:1(9Z)/20:3(5Z,8Z,11Z))	C44H80NO8P	577538	1.07517e+06	1.06239e+06	635965	1.16263e+06	1.02235e+06	annotated
9888644	410	PC(18:0/18:4(6Z,9Z,12Z,15Z))	C44H80NO8P	577538	1.07517e+06	1.06239e+06	635965	1.16263e+06	1.02235e+06	annotated
9888645	410	PC(18:1(11Z)/18:3(9Z,12Z,15Z))	C44H80NO8P	577538	1.07517e+06	1.06239e+06	635965	1.16263e+06	1.02235e+06	annotated
9888646	410	PC(18:1(11Z)/18:3(6Z,9Z,12Z))	C44H80NO8P	577538	1.07517e+06	1.06239e+06	635965	1.16263e+06	1.02235e+06	annotated
9888647	410	PC(18:2(9Z,12Z)/18:2(9Z,12Z))	C44H80NO8P	577538	1.07517e+06	1.06239e+06	635965	1.16263e+06	1.02235e+06	annotated
9888648	410	PC(18:1(9Z)/18:3(9Z,12Z,15Z))	C44H80NO8P	577538	1.07517e+06	1.06239e+06	635965	1.16263e+06	1.02235e+06	annotated
9888649	410	PC(18:1(9Z)/18:3(6Z,9Z,12Z))	C44H80NO8P	577538	1.07517e+06	1.06239e+06	635965	1.16263e+06	1.02235e+06	annotated
9888650	410	PC(18:3(6Z,9Z,12Z)/18:1(9Z))	C44H80NO8P	577538	1.07517e+06	1.06239e+06	635965	1.16263e+06	1.02235e+06	annotated
9888651	410	PC(18:3(6Z,9Z,12Z)/18:1(11Z))	C44H80NO8P	577538	1.07517e+06	1.06239e+06	635965	1.16263e+06	1.02235e+06	annotated
9888652	410	PC(18:3(9Z,12Z,15Z)/18:1(9Z))	C44H80NO8P	577538	1.07517e+06	1.06239e+06	635965	1.16263e+06	1.02235e+06	annotated
9888653	410	PC(18:3(9Z,12Z,15Z)/18:1(11Z))	C44H80NO8P	577538	1.07517e+06	1.06239e+06	635965	1.16263e+06	1.02235e+06	annotated
9888654	410	PC(18:4(6Z,9Z,12Z,15Z)/18:0)	C44H80NO8P	577538	1.07517e+06	1.06239e+06	635965	1.16263e+06	1.02235e+06	annotated
9888655	410	PC(16:0/20:4(8Z,11Z,14Z,17Z))	C44H80NO8P	577538	1.07517e+06	1.06239e+06	635965	1.16263e+06	1.02235e+06	annotated
9888656	410	PC(16:0/20:4(5Z,8Z,11Z,14Z))	C44H80NO8P	577538	1.07517e+06	1.06239e+06	635965	1.16263e+06	1.02235e+06	annotated
9888661	410	PC(14:0/22:4(7Z,10Z,13Z,16Z))	C44H80NO8P	577538	1.07517e+06	1.06239e+06	635965	1.16263e+06	1.02235e+06	annotated
9888675	410	PE(22:4(7Z,10Z,13Z,16Z)/17:0)	C44H80NO8P	577538	1.07517e+06	1.06239e+06	635965	1.16263e+06	1.02235e+06	annotated
9888676	410	PE(22:2(13Z,16Z)/17:2(9Z,12Z))	C44H80NO8P	577538	1.07517e+06	1.06239e+06	635965	1.16263e+06	1.02235e+06	annotated
9888677	410	PE(21:0/18:4(6Z,9Z,12Z,15Z))	C44H80NO8P	577538	1.07517e+06	1.06239e+06	635965	1.16263e+06	1.02235e+06	annotated
9888678	410	PC(18:0/18:4(9E,11E,13E,15E))	C44H80NO8P	577538	1.07517e+06	1.06239e+06	635965	1.16263e+06	1.02235e+06	annotated
9888679	410	PC(18:2(2Z,4Z)/18:2(2Z,4Z))	C44H80NO8P	577538	1.07517e+06	1.06239e+06	635965	1.16263e+06	1.02235e+06	annotated
9888680	410	PC(18:2(2E,4E)/18:2(2E,4E))	C44H80NO8P	577538	1.07517e+06	1.06239e+06	635965	1.16263e+06	1.02235e+06	annotated
9888681	410	PC(18:2(6Z,9Z)/18:2(6Z,9Z))	C44H80NO8P	577538	1.07517e+06	1.06239e+06	635965	1.16263e+06	1.02235e+06	annotated
9888682	410	PC(18:2(9Z,11Z)/18:2(9Z,11Z))	C44H80NO8P	577538	1.07517e+06	1.06239e+06	635965	1.16263e+06	1.02235e+06	annotated
9888683	410	PC(16:0/20:4(5E,8E,11E,14E))	C44H80NO8P	577538	1.07517e+06	1.06239e+06	635965	1.16263e+06	1.02235e+06	annotated
9888684	410	PC(20:4(8E,11E,14E,17E)/16:0)	C44H80NO8P	577538	1.07517e+06	1.06239e+06	635965	1.16263e+06	1.02235e+06	annotated
9888685	410	PE(17:2(9Z,12Z)/22:2(13Z,16Z))	C44H80NO8P	577538	1.07517e+06	1.06239e+06	635965	1.16263e+06	1.02235e+06	annotated
9888686	410	PE(18:4(6Z,9Z,12Z,15Z)/21:0)	C44H80NO8P	577538	1.07517e+06	1.06239e+06	635965	1.16263e+06	1.02235e+06	annotated
9888687	410	PE(19:0/20:4(5Z,8Z,11Z,14Z))	C44H80NO8P	577538	1.07517e+06	1.06239e+06	635965	1.16263e+06	1.02235e+06	annotated
9888688	410	PE(17:0/22:4(7Z,10Z,13Z,16Z))	C44H80NO8P	577538	1.07517e+06	1.06239e+06	635965	1.16263e+06	1.02235e+06	annotated
9888689	410	PE(19:1(9Z)/20:3(8Z,11Z,14Z))	C44H80NO8P	577538	1.07517e+06	1.06239e+06	635965	1.16263e+06	1.02235e+06	annotated
9888690	410	PE(20:3(8Z,11Z,14Z)/19:1(9Z))	C44H80NO8P	577538	1.07517e+06	1.06239e+06	635965	1.16263e+06	1.02235e+06	annotated
9888691	410	PE(20:4(5Z,8Z,11Z,14Z)/19:0)	C44H80NO8P	577538	1.07517e+06	1.06239e+06	635965	1.16263e+06	1.02235e+06	annotated
9888694	412	N-Acetylhistidine	C8H11N3O3	342210	763985	847090	412854	853872	461667	annotated
9888697	412	HC Red No. 3	C8H11N3O3	342210	763985	847090	412854	853872	461667	annotated
9888699	412	N-Acetyl-L-histidine	C8H11N3O3	342210	763985	847090	412854	853872	461667	annotated
9888701	412	Methyl5-(but-3-en-1-yl)amino-1,3,4-oxadiazole-2-carboxylate	C8H11N3O3	342210	763985	847090	412854	853872	461667	annotated
9888710	419	Fenugreekine	C21H27N7O14P2	640607	1112477	1.0835e+06	598685	908070	790949	annotated+fragment
9888722	421	3-Ethenyl-2,5-dimethyl-4-oxohex-5-en-2-yl acetate	C12H18O3	59289	97169.9	70714.5	42010.4	74202.3	56952.5	annotated
9888723	421	Dihydro-3-(2-octenyl)-2,5-furandione	C12H18O3	59289	97169.9	70714.5	42010.4	74202.3	56952.5	annotated
9888724	421	Isoamyl 2-furonpropionate	C12H18O3	59289	97169.9	70714.5	42010.4	74202.3	56952.5	annotated
9888725	421	Dihydro-3-(1-octenyl)-2,5-furandione	C12H18O3	59289	97169.9	70714.5	42010.4	74202.3	56952.5	annotated
9888726	421	4-(Butoxymethyl)-2-methoxyphenol	C12H18O3	59289	97169.9	70714.5	42010.4	74202.3	56952.5	annotated
9888727	421	(R)-8-Acetoxycarvotanacetone	C12H18O3	59289	97169.9	70714.5	42010.4	74202.3	56952.5	annotated
9888728	421	1-Benzyloxy-1-(2-methoxyethoxy)ethane	C12H18O3	59289	97169.9	70714.5	42010.4	74202.3	56952.5	annotated
9888729	421	Sedanonic acid	C12H18O3	59289	97169.9	70714.5	42010.4	74202.3	56952.5	annotated
9888730	421	Jasmonic acid	C12H18O3	59289	97169.9	70714.5	42010.4	74202.3	56952.5	annotated
9888731	421	(3R,7S)-iso-jasmonic acid	C12H18O3	59289	97169.9	70714.5	42010.4	74202.3	56952.5	annotated
9888732	421	(3S,7S)-Jasmonic acid	C12H18O3	59289	97169.9	70714.5	42010.4	74202.3	56952.5	annotated
9888733	421	(3S,7R)-iso-jasmonic acid	C12H18O3	59289	97169.9	70714.5	42010.4	74202.3	56952.5	annotated
9888735	423	Rishitin	C14H22O2	27802.2	43481.4	23258.5	24756.2	56044.2	51659	annotated
9888736	423	2,6-Di-tert-butyl-1,4-benzenediol	C14H22O2	27802.2	43481.4	23258.5	24756.2	56044.2	51659	annotated
9888737	423	Isokobusone	C14H22O2	27802.2	43481.4	23258.5	24756.2	56044.2	51659	annotated
9888738	423	Kobusone	C14H22O2	27802.2	43481.4	23258.5	24756.2	56044.2	51659	annotated
9888739	423	Acetaldehyde butyl phenethyl acetal	C14H22O2	27802.2	43481.4	23258.5	24756.2	56044.2	51659	annotated
9888740	423	(10betaH,11xi)-11-Hydroxy-13-nor-6-eremophilen-8-one	C14H22O2	27802.2	43481.4	23258.5	24756.2	56044.2	51659	annotated
9888741	423	Rishitin	C14H22O2	27802.2	43481.4	23258.5	24756.2	56044.2	51659	annotated
9888742	423	Isokobusone	C14H22O2	27802.2	43481.4	23258.5	24756.2	56044.2	51659	annotated
9888743	423	Kobusone	C14H22O2	27802.2	43481.4	23258.5	24756.2	56044.2	51659	annotated
9888744	423	9Z-Dodecen-7-ynyl acetate	C14H22O2	27802.2	43481.4	23258.5	24756.2	56044.2	51659	annotated
9888745	423	7Z,9E,11-Dodecatrienyl acetate	C14H22O2	27802.2	43481.4	23258.5	24756.2	56044.2	51659	annotated
9888746	423	7E,9Z,11-Dodecatrienyl acetate	C14H22O2	27802.2	43481.4	23258.5	24756.2	56044.2	51659	annotated
9888747	423	7E,9E,11-Dodecatrienyl acetate	C14H22O2	27802.2	43481.4	23258.5	24756.2	56044.2	51659	annotated
9888748	423	S-cucujolide V	C14H22O2	27802.2	43481.4	23258.5	24756.2	56044.2	51659	annotated
9888749	423	R-cucujolide V	C14H22O2	27802.2	43481.4	23258.5	24756.2	56044.2	51659	annotated
9888750	424	Curdione	C15H24O2	28181	48784.8	27287	23154.3	34361.1	19748.4	annotated
9888751	424	3-Hydroxy-1,10-bisaboladien-9-one	C15H24O2	28181	48784.8	27287	23154.3	34361.1	19748.4	annotated
9888752	424	beta-Ionyl acetate	C15H24O2	28181	48784.8	27287	23154.3	34361.1	19748.4	annotated
9888753	424	Petasitolone	C15H24O2	28181	48784.8	27287	23154.3	34361.1	19748.4	annotated
9888754	424	Davanone	C15H24O2	28181	48784.8	27287	23154.3	34361.1	19748.4	annotated
9888755	424	Curcumol	C15H24O2	28181	48784.8	27287	23154.3	34361.1	19748.4	annotated
9888756	424	Isolubimin	C15H24O2	28181	48784.8	27287	23154.3	34361.1	19748.4	annotated
9888757	424	Aubergenone	C15H24O2	28181	48784.8	27287	23154.3	34361.1	19748.4	annotated
9888758	424	(-)-Myrtenyl isovalerate	C15H24O2	28181	48784.8	27287	23154.3	34361.1	19748.4	annotated
9888759	424	Rishitinone	C15H24O2	28181	48784.8	27287	23154.3	34361.1	19748.4	annotated
9888760	424	4alpha,5alpha-Epoxy-11-eudesmen-3a-ol	C15H24O2	28181	48784.8	27287	23154.3	34361.1	19748.4	annotated
9888761	424	7-Hydroxycostol	C15H24O2	28181	48784.8	27287	23154.3	34361.1	19748.4	annotated
9888762	424	Epilubimin	C15H24O2	28181	48784.8	27287	23154.3	34361.1	19748.4	annotated
9888763	424	Dihydro-alpha-santalic acid	C15H24O2	28181	48784.8	27287	23154.3	34361.1	19748.4	annotated
9888764	424	Tuberonone	C15H24O2	28181	48784.8	27287	23154.3	34361.1	19748.4	annotated
9888765	424	Humulene diepoxide A	C15H24O2	28181	48784.8	27287	23154.3	34361.1	19748.4	annotated
9888766	424	(2E,6E)-1-Hydroxy-2,6,10-farnesatrien-9-one	C15H24O2	28181	48784.8	27287	23154.3	34361.1	19748.4	annotated
9888767	424	2-Hydroxyacorenone	C15H24O2	28181	48784.8	27287	23154.3	34361.1	19748.4	annotated
9888768	424	Acorusnol	C15H24O2	28181	48784.8	27287	23154.3	34361.1	19748.4	annotated
9888769	424	2,6-Di-tert-butyl-4-hydroxymethylphenol	C15H24O2	28181	48784.8	27287	23154.3	34361.1	19748.4	annotated
9888770	424	Geranyl tiglate	C15H24O2	28181	48784.8	27287	23154.3	34361.1	19748.4	annotated
9888771	424	beta-Kessyl ketone	C15H24O2	28181	48784.8	27287	23154.3	34361.1	19748.4	annotated
9888772	424	Apotrichothecene	C15H24O2	28181	48784.8	27287	23154.3	34361.1	19748.4	annotated
9888773	424	Cyperolone	C15H24O2	28181	48784.8	27287	23154.3	34361.1	19748.4	annotated
9888774	424	Tanavulgarol	C15H24O2	28181	48784.8	27287	23154.3	34361.1	19748.4	annotated
9888775	424	Humulene-8-hydroperoxide	C15H24O2	28181	48784.8	27287	23154.3	34361.1	19748.4	annotated
9888776	424	capsidiol	C15H24O2	28181	48784.8	27287	23154.3	34361.1	19748.4	annotated
9888777	424	Epiacorone	C15H24O2	28181	48784.8	27287	23154.3	34361.1	19748.4	annotated
9888778	424	(4S)-Dihydrocurcumenone	C15H24O2	28181	48784.8	27287	23154.3	34361.1	19748.4	annotated
9888779	424	Calamensesquiterpinenol	C15H24O2	28181	48784.8	27287	23154.3	34361.1	19748.4	annotated
9888780	424	Hernandulcin	C15H24O2	28181	48784.8	27287	23154.3	34361.1	19748.4	annotated
9888781	424	(3xi,7(11)Z)-7(11)-Copaene-4,12-diol	C15H24O2	28181	48784.8	27287	23154.3	34361.1	19748.4	annotated
9888782	424	10alpha-4,5-Seco-11-eudesmene-4,5-dione	C15H24O2	28181	48784.8	27287	23154.3	34361.1	19748.4	annotated
9888783	424	Curdione	C15H24O2	28181	48784.8	27287	23154.3	34361.1	19748.4	annotated
9888784	424	Helminthosporol	C15H24O2	28181	48784.8	27287	23154.3	34361.1	19748.4	annotated
9888785	424	Hernandulcin	C15H24O2	28181	48784.8	27287	23154.3	34361.1	19748.4	annotated
9888786	424	Lubimin	C15H24O2	28181	48784.8	27287	23154.3	34361.1	19748.4	annotated
9888787	424	Sirenin	C15H24O2	28181	48784.8	27287	23154.3	34361.1	19748.4	annotated
9888788	424	Latia luciferin	C15H24O2	28181	48784.8	27287	23154.3	34361.1	19748.4	annotated
9888789	424	Cyperolone	C15H24O2	28181	48784.8	27287	23154.3	34361.1	19748.4	annotated
9888790	424	Kikkanol B	C15H24O2	28181	48784.8	27287	23154.3	34361.1	19748.4	annotated
9888791	424	Farnesoic acid	C15H24O2	28181	48784.8	27287	23154.3	34361.1	19748.4	annotated
9888792	424	(-)-Kanshone A	C15H24O2	28181	48784.8	27287	23154.3	34361.1	19748.4	annotated
9888793	424	Capnell-9(12)-ene-8beta,10alpha-diol	C15H24O2	28181	48784.8	27287	23154.3	34361.1	19748.4	annotated
9888794	424	4E,7Z,10Z-Tridecatrienyl acetate	C15H24O2	28181	48784.8	27287	23154.3	34361.1	19748.4	annotated
9888795	425	Geranyl acetoacetate	C14H22O3	28883.6	34791.9	28224.5	22992.6	39331.5	31423.3	annotated
9888796	425	(9S,13S)-1a,1b-dihomo-jasmonic acid	C14H22O3	28883.6	34791.9	28224.5	22992.6	39331.5	31423.3	annotated
9888797	425	(9R,13R)-1a,1b-dihomo-jasmonic acid	C14H22O3	28883.6	34791.9	28224.5	22992.6	39331.5	31423.3	annotated
9888798	425	Sundiversifolide	C14H22O3	28883.6	34791.9	28224.5	22992.6	39331.5	31423.3	annotated
9888799	425	7-oxo-11E,13-Tetradecadienoic acid	C14H22O3	28883.6	34791.9	28224.5	22992.6	39331.5	31423.3	annotated
9888800	426	cis-3-Hexenyl pyruvate	C9H14O3	22757.7	26844.8	20589.3	17128.2	30015.5	26518.3	annotated
9888801	426	1,4-Ipomeadiol	C9H14O3	22757.7	26844.8	20589.3	17128.2	30015.5	26518.3	annotated
9888802	426	Furfural diethyl acetal	C9H14O3	22757.7	26844.8	20589.3	17128.2	30015.5	26518.3	annotated
9888803	427	2-[4-(3-Hydroxypropyl)-2-methoxyphenoxy]-1,3-propanediol	C13H20O5	10327	21837.2	16101.4	10449.6	27447.8	15453.5	annotated
9888804	427	1-Methoxy-1-(2,4,5-trimethoxyphenyl)-2-propanol	C13H20O5	10327	21837.2	16101.4	10449.6	27447.8	15453.5	annotated
9888805	428	Propofol	C12H18O	15416.7	23447.5	19524.8	14018	24778.9	18430.8	annotated
9888806	428	Geijerone	C12H18O	15416.7	23447.5	19524.8	14018	24778.9	18430.8	annotated
9888807	428	Quinceoxepine	C12H18O	15416.7	23447.5	19524.8	14018	24778.9	18430.8	annotated
9888808	428	11-Methyl-7-oxatetracyclo[6.3.1.01,6.04,11]dodecane	C12H18O	15416.7	23447.5	19524.8	14018	24778.9	18430.8	annotated
9888809	428	7-Isopropyl-5-methylbicyclo[2.2.2]oct-5-en-2-one	C12H18O	15416.7	23447.5	19524.8	14018	24778.9	18430.8	annotated
9888810	428	4-Methyl-1-phenyl-2-pentanol	C12H18O	15416.7	23447.5	19524.8	14018	24778.9	18430.8	annotated
9888811	428	3-Methyl-1-phenyl-3-pentanol	C12H18O	15416.7	23447.5	19524.8	14018	24778.9	18430.8	annotated
9888812	428	Tricycloekasantal	C12H18O	15416.7	23447.5	19524.8	14018	24778.9	18430.8	annotated
9888813	428	2-Ethoxy-1-methyl-4-(1-methylethyl)benzene	C12H18O	15416.7	23447.5	19524.8	14018	24778.9	18430.8	annotated
9888814	428	2,5-Diisopropylphenol	C12H18O	15416.7	23447.5	19524.8	14018	24778.9	18430.8	annotated
9888815	428	4-n-Hexylphenol	C12H18O	15416.7	23447.5	19524.8	14018	24778.9	18430.8	annotated
9888819	485	Hydroxymethyl indol-3-yl ketone	C10H9NO2	88432.6	231691	363740	96157.3	264207	128407	annotated
9888820	485	Indole-3-acetate	C10H9NO2	88432.6	231691	363740	96157.3	264207	128407	annotated
9888821	485	5-Hydroxyindoleacetaldehyde	C10H9NO2	88432.6	231691	363740	96157.3	264207	128407	annotated
9888822	485	1-Methoxy-1H-indole-3-carboxaldehyde	C10H9NO2	88432.6	231691	363740	96157.3	264207	128407	annotated
9888825	485	Gentianine	C10H9NO2	88432.6	231691	363740	96157.3	264207	128407	annotated
9888826	485	3-Hydroxy-2-methyl-1H-quinolin-4-one	C10H9NO2	88432.6	231691	363740	96157.3	264207	128407	annotated
9888827	485	3-Methyl-quinolin-2,8-diol	C10H9NO2	88432.6	231691	363740	96157.3	264207	128407	annotated
9888828	485	NH2Mec	C10H9NO2	88432.6	231691	363740	96157.3	264207	128407	annotated
9888829	485	N-Acetylindoxyl	C10H9NO2	88432.6	231691	363740	96157.3	264207	128407	annotated
9888830	485	(Indol-3-yl)glycolaldehyde	C10H9NO2	88432.6	231691	363740	96157.3	264207	128407	annotated
9888891	490	PC(P-18:1(11Z)/18:1(9Z))	C44H84NO7P	127503	151540	140507	146572	154772	148592	annotated
9888892	490	PC(P-18:1(11Z)/18:1(11Z))	C44H84NO7P	127503	151540	140507	146572	154772	148592	annotated
9888893	490	PC(P-18:0/18:2(9Z,12Z))	C44H84NO7P	127503	151540	140507	146572	154772	148592	annotated
9888894	490	PC(P-16:0/20:2(11Z,14Z))	C44H84NO7P	127503	151540	140507	146572	154772	148592	annotated
9888895	490	PC(P-18:1(9Z)/18:1(11Z))	C44H84NO7P	127503	151540	140507	146572	154772	148592	annotated
9888896	490	PC(P-18:1(9Z)/18:1(9Z))	C44H84NO7P	127503	151540	140507	146572	154772	148592	annotated
9888897	490	1-O-Hexadecyl-2-O-dihomogammalinolenoylglycero-3-phosphocholine	C44H84NO7P	127503	151540	140507	146572	154772	148592	annotated
9888898	490	PC(20:2(11Z,14Z)/P-16:0)	C44H84NO7P	127503	151540	140507	146572	154772	148592	annotated
9888899	490	PC(18:1(11Z)/P-18:1(9Z))	C44H84NO7P	127503	151540	140507	146572	154772	148592	annotated
9888900	490	PC(18:1(11Z)/P-18:1(11Z))	C44H84NO7P	127503	151540	140507	146572	154772	148592	annotated
9888901	490	PC(18:1(9Z)/P-18:1(9Z))	C44H84NO7P	127503	151540	140507	146572	154772	148592	annotated
9888902	490	PC(18:1(9Z)/P-18:1(11Z))	C44H84NO7P	127503	151540	140507	146572	154772	148592	annotated
9888903	490	PC(18:2(9Z,12Z)/P-18:0)	C44H84NO7P	127503	151540	140507	146572	154772	148592	annotated
9888904	490	PC(O-18:1(11Z)/18:2(9Z,12Z))	C44H84NO7P	127503	151540	140507	146572	154772	148592	annotated
9888905	490	PC(O-18:1(9Z)/18:2(9Z,12Z))	C44H84NO7P	127503	151540	140507	146572	154772	148592	annotated
9888907	490	PC(18:2(9Z,12Z)/P-16:0)	C44H84NO7P	127503	151540	140507	146572	154772	148592	annotated
9888908	490	PC(18:1(11Z)/P-18:1(11Z))	C44H84NO7P	127503	151540	140507	146572	154772	148592	annotated
9888909	490	PC(18:1(11Z)/P-18:1(9Z))	C44H84NO7P	127503	151540	140507	146572	154772	148592	annotated
9888910	490	PC(18:1(9Z)/P-18:1(9Z))	C44H84NO7P	127503	151540	140507	146572	154772	148592	annotated
9888911	490	PC(18:1(9Z)/P-18:1(11Z))	C44H84NO7P	127503	151540	140507	146572	154772	148592	annotated
9888912	490	PC(20:2(11Z,14Z)/P-16:0)	C44H84NO7P	127503	151540	140507	146572	154772	148592	annotated
9888915	490	PC(O-18:0/18:3(6Z,9Z,12Z))	C44H84NO7P	127503	151540	140507	146572	154772	148592	annotated
9888916	490	PC(O-18:0/18:3(9Z,12Z,15Z))	C44H84NO7P	127503	151540	140507	146572	154772	148592	annotated
9888919	490	PC(O-16:0/20:3(8Z,11Z,14Z))	C44H84NO7P	127503	151540	140507	146572	154772	148592	annotated
9888925	493	CDP-choline	C14H26N4O11P2	477893	0	74623.1	988677	378356	295441	annotated+fragment
9888939	494	Isobutyryl-L-carnitine	C11H21NO4	201281	694960	683707	66384.9	367152	386435	annotated
9888940	494	O-Butanoylcarnitine	C11H21NO4	201281	694960	683707	66384.9	367152	386435	annotated
9888941	494	O-butanoyl-carnitine	C11H21NO4	201281	694960	683707	66384.9	367152	386435	annotated
9888942	494	O-isobutyryl-L-carnitine	C11H21NO4	201281	694960	683707	66384.9	367152	386435	annotated
9888943	494	N(alpha)-t-Butoxycarbonyl-L-leucine	C11H21NO4	201281	694960	683707	66384.9	367152	386435	annotated
9888980	499	Stearamide	C18H37NO	298102	727695	222038	122225	265089	345134	annotated
9888993	515	Misoprostol	C22H38O5	34064.2	45042.1	22541.2	21505.9	20117.2	30787	annotated
9888994	515	16,16-dimethyl-PGE1	C22H38O5	34064.2	45042.1	22541.2	21505.9	20117.2	30787	annotated
9888995	515	1a,1b-dihomo-PGF2alpha	C22H38O5	34064.2	45042.1	22541.2	21505.9	20117.2	30787	annotated
9888996	515	15-methyl-15R-PGF2alpha methyl ester	C22H38O5	34064.2	45042.1	22541.2	21505.9	20117.2	30787	annotated
9888997	515	1a,1b-dihomo-PGE1	C22H38O5	34064.2	45042.1	22541.2	21505.9	20117.2	30787	annotated
9888998	515	20-ethyl PGF2alpha	C22H38O5	34064.2	45042.1	22541.2	21505.9	20117.2	30787	annotated
9888999	515	16,16-dimethyl-PGF2beta	C22H38O5	34064.2	45042.1	22541.2	21505.9	20117.2	30787	annotated
9889000	515	unoprostone	C22H38O5	34064.2	45042.1	22541.2	21505.9	20117.2	30787	annotated
9889001	515	7-F2-dihomo-IsoP	C22H38O5	34064.2	45042.1	22541.2	21505.9	20117.2	30787	annotated
9889002	515	17-F2-dihomo-IsoP	C22H38O5	34064.2	45042.1	22541.2	21505.9	20117.2	30787	annotated
9889003	515	14-F2-dihomo-IsoP	C22H38O5	34064.2	45042.1	22541.2	21505.9	20117.2	30787	annotated
9889048	519	L-Tyrosine	C9H11NO3	137546	444734	463736	174575	643468	640442	identified
9889049	519	o-Tyrosine	C9H11NO3	137546	444734	463736	174575	643468	640442	annotated
9889050	519	Meta-Tyrosine	C9H11NO3	137546	444734	463736	174575	643468	640442	annotated
9889053	519	4,6,7-Trihydroxy-1,2,3,4-tetrahydroisoquinoline	C9H11NO3	137546	444734	463736	174575	643468	640442	annotated
9889054	519	4-Hydroxy-4-(3-pyridyl)-butanoic acid	C9H11NO3	137546	444734	463736	174575	643468	640442	annotated
9889055	519	L-Threo-3-Phenylserine	C9H11NO3	137546	444734	463736	174575	643468	640442	annotated
9889057	519	3-Amino-3-(4-hydroxyphenyl)propanoate	C9H11NO3	137546	444734	463736	174575	643468	640442	annotated
9889058	519	N-Hydroxy-L-phenylalanine	C9H11NO3	137546	444734	463736	174575	643468	640442	annotated
9889059	519	D-Tyrosine	C9H11NO3	137546	444734	463736	174575	643468	640442	annotated
9889062	519	DL-Tyrosine	C9H11NO3	137546	444734	463736	174575	643468	640442	annotated
9889066	519	L-threo-3-Phenylserine	C9H11NO3	137546	444734	463736	174575	643468	640442	annotated
9889067	519	L-Tyrosine	C9H11NO3	137546	444734	463736	174575	643468	640442	annotated
9889077	521	Cer(d18:1/24:1(15Z))	C42H81NO3	324652	276306	298341	414638	587532	600654	annotated
9889078	524	PE(18:1(9Z)/15:0)	C38H74NO8P	480254	943316	830023	372750	556323	609020	annotated
9889079	524	PE(18:1(11Z)/15:0)	C38H74NO8P	480254	943316	830023	372750	556323	609020	annotated
9889080	524	PE(15:0/18:1(11Z))	C38H74NO8P	480254	943316	830023	372750	556323	609020	annotated
9889081	524	PE(15:0/18:1(9Z))	C38H74NO8P	480254	943316	830023	372750	556323	609020	annotated
9889104	524	PC(14:1(9Z)/16:0)	C38H74NO8P	480254	943316	830023	372750	556323	609020	annotated
9889105	524	PC(16:0/14:1(9Z))	C38H74NO8P	480254	943316	830023	372750	556323	609020	annotated
9889106	524	PC(16:1(9Z)/14:0)	C38H74NO8P	480254	943316	830023	372750	556323	609020	annotated
9889118	524	PC(14:0/16:1(9Z))	C38H74NO8P	480254	943316	830023	372750	556323	609020	annotated
9889129	524	PE(16:0/17:1(9Z))	C38H74NO8P	480254	943316	830023	372750	556323	609020	annotated
9889130	524	PC(12:0/18:1(9Z))	C38H74NO8P	480254	943316	830023	372750	556323	609020	annotated
9889131	524	PC(13:0/17:1(9Z))	C38H74NO8P	480254	943316	830023	372750	556323	609020	annotated
9889132	524	PC(17:1(9Z)/13:0)	C38H74NO8P	480254	943316	830023	372750	556323	609020	annotated
9889133	524	PC(18:1(9Z)/12:0)	C38H74NO8P	480254	943316	830023	372750	556323	609020	annotated
9889134	524	PC(15:0/15:1(9Z))	C38H74NO8P	480254	943316	830023	372750	556323	609020	annotated
9889135	524	PC(15:1(9Z)/15:0)	C38H74NO8P	480254	943316	830023	372750	556323	609020	annotated
9889136	524	PE(13:0/20:1(11Z))	C38H74NO8P	480254	943316	830023	372750	556323	609020	annotated
9889137	524	PE(18:0/15:1(9Z))	C38H74NO8P	480254	943316	830023	372750	556323	609020	annotated
9889138	524	PE(19:0/14:1(9Z))	C38H74NO8P	480254	943316	830023	372750	556323	609020	annotated
9889139	524	PE(19:1(9Z)/14:0)	C38H74NO8P	480254	943316	830023	372750	556323	609020	annotated
9889140	524	PE(15:1(9Z)/18:0)	C38H74NO8P	480254	943316	830023	372750	556323	609020	annotated
9889141	524	PE(14:0/19:1(9Z))	C38H74NO8P	480254	943316	830023	372750	556323	609020	annotated
9889142	524	PE(14:1(9Z)/19:0)	C38H74NO8P	480254	943316	830023	372750	556323	609020	annotated
9889143	524	PE(16:1(9Z)/17:0)	C38H74NO8P	480254	943316	830023	372750	556323	609020	annotated
9889144	524	PE(17:0/16:1(9Z))	C38H74NO8P	480254	943316	830023	372750	556323	609020	annotated
9889145	524	PE(17:1(9Z)/16:0)	C38H74NO8P	480254	943316	830023	372750	556323	609020	annotated
9889146	524	PE(20:1(11Z)/13:0)	C38H74NO8P	480254	943316	830023	372750	556323	609020	annotated
9889154	525	PC(20:2(11Z,14Z)/14:1(9Z))	C42H78NO8P	115291	231885	232553	131662	241411	228465	annotated
9889155	525	PC(20:3(5Z,8Z,11Z)/14:0)	C42H78NO8P	115291	231885	232553	131662	241411	228465	annotated
9889156	525	PC(20:3(8Z,11Z,14Z)/14:0)	C42H78NO8P	115291	231885	232553	131662	241411	228465	annotated
9889157	525	PC(16:1(9Z)/18:2(9Z,12Z))	C42H78NO8P	115291	231885	232553	131662	241411	228465	annotated
9889158	525	PC(18:2(9Z,12Z)/16:1(9Z))	C42H78NO8P	115291	231885	232553	131662	241411	228465	annotated
9889159	525	PC(18:3(6Z,9Z,12Z)/16:0)	C42H78NO8P	115291	231885	232553	131662	241411	228465	annotated
9889160	525	PC(18:3(9Z,12Z,15Z)/16:0)	C42H78NO8P	115291	231885	232553	131662	241411	228465	annotated
9889161	525	PC(14:1(9Z)/20:2(11Z,14Z))	C42H78NO8P	115291	231885	232553	131662	241411	228465	annotated
9889162	525	PC(16:0/18:3(9Z,12Z,15Z))	C42H78NO8P	115291	231885	232553	131662	241411	228465	annotated
9889163	525	PC(16:0/18:3(6Z,9Z,12Z))	C42H78NO8P	115291	231885	232553	131662	241411	228465	annotated
9889177	525	PC(14:0/20:3(8Z,11Z,14Z))	C42H78NO8P	115291	231885	232553	131662	241411	228465	annotated
9889178	525	PC(14:0/20:3(5Z,8Z,11Z))	C42H78NO8P	115291	231885	232553	131662	241411	228465	annotated
9889194	525	PE(22:2(13Z,16Z)/15:1(9Z))	C42H78NO8P	115291	231885	232553	131662	241411	228465	annotated
9889195	525	PC(17:1(9Z)/17:2(9Z,12Z))	C42H78NO8P	115291	231885	232553	131662	241411	228465	annotated
9889196	525	PC(17:2(9Z,12Z)/17:1(9Z))	C42H78NO8P	115291	231885	232553	131662	241411	228465	annotated
9889197	525	PE(18:2(9Z,12Z)/19:1(9Z))	C42H78NO8P	115291	231885	232553	131662	241411	228465	annotated
9889198	525	PE(18:3(6Z,9Z,12Z)/19:0)	C42H78NO8P	115291	231885	232553	131662	241411	228465	annotated
9889199	525	PE(17:2(9Z,12Z)/20:1(11Z))	C42H78NO8P	115291	231885	232553	131662	241411	228465	annotated
9889200	525	PE(19:0/18:3(9Z,12Z,15Z))	C42H78NO8P	115291	231885	232553	131662	241411	228465	annotated
9889201	525	PE(19:0/18:3(6Z,9Z,12Z))	C42H78NO8P	115291	231885	232553	131662	241411	228465	annotated
9889202	525	PE(18:3(9Z,12Z,15Z)/19:0)	C42H78NO8P	115291	231885	232553	131662	241411	228465	annotated
9889203	525	PE(17:0/20:3(8Z,11Z,14Z))	C42H78NO8P	115291	231885	232553	131662	241411	228465	annotated
9889204	525	PE(17:1(9Z)/20:2(11Z,14Z))	C42H78NO8P	115291	231885	232553	131662	241411	228465	annotated
9889205	525	PE(15:1(9Z)/22:2(13Z,16Z))	C42H78NO8P	115291	231885	232553	131662	241411	228465	annotated
9889206	525	PE(20:2(11Z,14Z)/17:1(9Z))	C42H78NO8P	115291	231885	232553	131662	241411	228465	annotated
9889208	525	PE(19:1(9Z)/18:2(9Z,12Z))	C42H78NO8P	115291	231885	232553	131662	241411	228465	annotated
9889209	525	PE(20:1(11Z)/17:2(9Z,12Z))	C42H78NO8P	115291	231885	232553	131662	241411	228465	annotated
9889210	525	PE(20:3(8Z,11Z,14Z)/17:0)	C42H78NO8P	115291	231885	232553	131662	241411	228465	annotated
9889211	527	PE(22:5(7Z,10Z,13Z,16Z,19Z)/16:0)	C43H76NO8P	53176.6	81055.1	86701.3	48522.8	68757.1	68085.2	annotated
9889213	527	PE(20:2(11Z,14Z)/18:3(6Z,9Z,12Z))	C43H76NO8P	53176.6	81055.1	86701.3	48522.8	68757.1	68085.2	annotated
9889214	527	PE(20:2(11Z,14Z)/18:3(9Z,12Z,15Z))	C43H76NO8P	53176.6	81055.1	86701.3	48522.8	68757.1	68085.2	annotated
9889216	527	PE(20:1(11Z)/18:4(6Z,9Z,12Z,15Z))	C43H76NO8P	53176.6	81055.1	86701.3	48522.8	68757.1	68085.2	annotated
9889217	527	PE(20:3(5Z,8Z,11Z)/18:2(9Z,12Z))	C43H76NO8P	53176.6	81055.1	86701.3	48522.8	68757.1	68085.2	annotated
9889218	527	PE(20:3(8Z,11Z,14Z)/18:2(9Z,12Z))	C43H76NO8P	53176.6	81055.1	86701.3	48522.8	68757.1	68085.2	annotated
9889219	527	PE(20:4(5Z,8Z,11Z,14Z)/18:1(11Z))	C43H76NO8P	53176.6	81055.1	86701.3	48522.8	68757.1	68085.2	annotated
9889220	527	PE(20:4(5Z,8Z,11Z,14Z)/18:1(9Z))	C43H76NO8P	53176.6	81055.1	86701.3	48522.8	68757.1	68085.2	annotated
9889221	527	PE(20:5(5Z,8Z,11Z,14Z,17Z)/18:0)	C43H76NO8P	53176.6	81055.1	86701.3	48522.8	68757.1	68085.2	annotated
9889222	527	PE(20:4(8Z,11Z,14Z,17Z)/18:1(11Z))	C43H76NO8P	53176.6	81055.1	86701.3	48522.8	68757.1	68085.2	annotated
9889223	527	PE(20:4(8Z,11Z,14Z,17Z)/18:1(9Z))	C43H76NO8P	53176.6	81055.1	86701.3	48522.8	68757.1	68085.2	annotated
9889224	527	PE(22:5(4Z,7Z,10Z,13Z,16Z)/16:0)	C43H76NO8P	53176.6	81055.1	86701.3	48522.8	68757.1	68085.2	annotated
9889225	527	PE(22:4(7Z,10Z,13Z,16Z)/16:1(9Z))	C43H76NO8P	53176.6	81055.1	86701.3	48522.8	68757.1	68085.2	annotated
9889229	527	PE(18:1(11Z)/20:4(5Z,8Z,11Z,14Z))	C43H76NO8P	53176.6	81055.1	86701.3	48522.8	68757.1	68085.2	annotated
9889230	527	PE(18:1(11Z)/20:4(8Z,11Z,14Z,17Z))	C43H76NO8P	53176.6	81055.1	86701.3	48522.8	68757.1	68085.2	annotated
9889233	527	PE(18:1(9Z)/20:4(5Z,8Z,11Z,14Z))	C43H76NO8P	53176.6	81055.1	86701.3	48522.8	68757.1	68085.2	annotated
9889234	527	PE(18:1(9Z)/20:4(8Z,11Z,14Z,17Z))	C43H76NO8P	53176.6	81055.1	86701.3	48522.8	68757.1	68085.2	annotated
9889235	527	PE(18:0/20:5(5Z,8Z,11Z,14Z,17Z))	C43H76NO8P	53176.6	81055.1	86701.3	48522.8	68757.1	68085.2	annotated
9889238	527	PE(18:4(6Z,9Z,12Z,15Z)/20:1(11Z))	C43H76NO8P	53176.6	81055.1	86701.3	48522.8	68757.1	68085.2	annotated
9889239	527	PE(18:2(9Z,12Z)/20:3(5Z,8Z,11Z))	C43H76NO8P	53176.6	81055.1	86701.3	48522.8	68757.1	68085.2	annotated
9889240	527	PE(18:2(9Z,12Z)/20:3(8Z,11Z,14Z))	C43H76NO8P	53176.6	81055.1	86701.3	48522.8	68757.1	68085.2	annotated
9889241	527	PE(18:3(9Z,12Z,15Z)/20:2(11Z,14Z))	C43H76NO8P	53176.6	81055.1	86701.3	48522.8	68757.1	68085.2	annotated
9889242	527	PE(18:3(6Z,9Z,12Z)/20:2(11Z,14Z))	C43H76NO8P	53176.6	81055.1	86701.3	48522.8	68757.1	68085.2	annotated
9889247	527	PE(16:0/22:5(4Z,7Z,10Z,13Z,16Z))	C43H76NO8P	53176.6	81055.1	86701.3	48522.8	68757.1	68085.2	annotated
9889248	527	PE(16:0/22:5(7Z,10Z,13Z,16Z,19Z))	C43H76NO8P	53176.6	81055.1	86701.3	48522.8	68757.1	68085.2	annotated
9889250	527	PE(16:1(9Z)/22:4(7Z,10Z,13Z,16Z))	C43H76NO8P	53176.6	81055.1	86701.3	48522.8	68757.1	68085.2	annotated
9889251	527	PC(20:5(5Z,8Z,11Z,14Z,17Z)/15:0)	C43H76NO8P	53176.6	81055.1	86701.3	48522.8	68757.1	68085.2	annotated
9889253	527	PC(15:0/20:5(5Z,8Z,11Z,14Z,17Z))	C43H76NO8P	53176.6	81055.1	86701.3	48522.8	68757.1	68085.2	annotated
9889285	527	PE(P-18:1(9Z)/20:4(6E,8Z,11Z,14Z)(5OH[S]))	C43H76NO8P	53176.6	81055.1	86701.3	48522.8	68757.1	68085.2	annotated
9889286	527	PE(P-18:1(9Z)/20:4(5Z,8Z,10E,14Z)(12OH[S]))	C43H76NO8P	53176.6	81055.1	86701.3	48522.8	68757.1	68085.2	annotated
9889287	527	PE(P-18:1(9Z)/20:4(5Z,8Z,11Z,13E)(15OH[S]))	C43H76NO8P	53176.6	81055.1	86701.3	48522.8	68757.1	68085.2	annotated
9889292	527	PC(17:1(9Z)/18:4(6Z,9Z,12Z,15Z))	C43H76NO8P	53176.6	81055.1	86701.3	48522.8	68757.1	68085.2	annotated
9889293	527	PC(17:2(9Z,12Z)/18:3(9Z,12Z,15Z))	C43H76NO8P	53176.6	81055.1	86701.3	48522.8	68757.1	68085.2	annotated
9889294	527	PC(17:2(9Z,12Z)/18:3(6Z,9Z,12Z))	C43H76NO8P	53176.6	81055.1	86701.3	48522.8	68757.1	68085.2	annotated
9889298	527	PC(15:1(9Z)/20:4(5Z,8Z,11Z,14Z))	C43H76NO8P	53176.6	81055.1	86701.3	48522.8	68757.1	68085.2	annotated
9889308	527	PC(18:4(6Z,9Z,12Z,15Z)/17:1(9Z))	C43H76NO8P	53176.6	81055.1	86701.3	48522.8	68757.1	68085.2	annotated
9889309	527	PC(18:3(6Z,9Z,12Z)/17:2(9Z,12Z))	C43H76NO8P	53176.6	81055.1	86701.3	48522.8	68757.1	68085.2	annotated
9889310	527	PC(18:3(9Z,12Z,15Z)/17:2(9Z,12Z))	C43H76NO8P	53176.6	81055.1	86701.3	48522.8	68757.1	68085.2	annotated
9889312	527	PC(20:5(5Z,8Z,11Z,14Z,17Z)/15:0)	C43H76NO8P	53176.6	81055.1	86701.3	48522.8	68757.1	68085.2	annotated
9889313	527	PC(20:4(5Z,8Z,11Z,14Z)/15:1(9Z))	C43H76NO8P	53176.6	81055.1	86701.3	48522.8	68757.1	68085.2	annotated
9889369	529	Ergothioneine	C9H15N3O2S	79693.7	96889.1	87922.3	40848.2	64059.7	55584.8	annotated
9889370	529	Benz[c]acridine	C17H11N	79693.7	96889.1	87922.3	40848.2	64059.7	55584.8	annotated
9889371	529	Benz[a]acridine	C17H11N	79693.7	96889.1	87922.3	40848.2	64059.7	55584.8	annotated
9889373	531	Bispyribac	C19H18N4O8	9504.32	13381.1	4492.38	3052.55	6067.25	6050.56	annotated
9889389	532	Anhydrotetracycline	C22H22N2O7	10598.9	8534.22	5359.21	3813.67	0	0	annotated
9889415	535	N4-(Acetyl-beta-D-glucosaminyl)asparagine	C12H21N3O8	6440.33	4033.23	4662.49	0	6605.36	5973.13	annotated
9889515	551	L-N2-(2-Carboxyethyl)arginine	C9H18N4O4	376590	569197	303450	196174	452119	266051	annotated+fragment
9889516	551	D-Octopine	C9H18N4O4	376590	569197	303450	196174	452119	266051	annotated+fragment
9889517	552	PE(20:0/18:4(6Z,9Z,12Z,15Z))	C43H78NO8P	522318	744388	823545	371994	599088	604536	annotated
9889518	552	PE(20:2(11Z,14Z)/18:2(9Z,12Z))	C43H78NO8P	522318	744388	823545	371994	599088	604536	annotated
9889519	552	PE(20:1(11Z)/18:3(6Z,9Z,12Z))	C43H78NO8P	522318	744388	823545	371994	599088	604536	annotated
9889520	552	PE(20:1(11Z)/18:3(9Z,12Z,15Z))	C43H78NO8P	522318	744388	823545	371994	599088	604536	annotated
9889521	552	PE(20:3(5Z,8Z,11Z)/18:1(11Z))	C43H78NO8P	522318	744388	823545	371994	599088	604536	annotated
9889522	552	PE(20:3(5Z,8Z,11Z)/18:1(9Z))	C43H78NO8P	522318	744388	823545	371994	599088	604536	annotated
9889523	552	PE(20:3(8Z,11Z,14Z)/18:1(11Z))	C43H78NO8P	522318	744388	823545	371994	599088	604536	annotated
9889524	552	PE(20:3(8Z,11Z,14Z)/18:1(9Z))	C43H78NO8P	522318	744388	823545	371994	599088	604536	annotated
9889525	552	PE(20:4(5Z,8Z,11Z,14Z)/18:0)	C43H78NO8P	522318	744388	823545	371994	599088	604536	annotated
9889526	552	PE(20:4(8Z,11Z,14Z,17Z)/18:0)	C43H78NO8P	522318	744388	823545	371994	599088	604536	annotated
9889527	552	PE(22:4(7Z,10Z,13Z,16Z)/16:0)	C43H78NO8P	522318	744388	823545	371994	599088	604536	annotated
9889528	552	PE(18:2(9Z,12Z)/20:2(11Z,14Z))	C43H78NO8P	522318	744388	823545	371994	599088	604536	annotated
9889529	552	PE(18:1(11Z)/20:3(5Z,8Z,11Z))	C43H78NO8P	522318	744388	823545	371994	599088	604536	annotated
9889530	552	PE(18:1(11Z)/20:3(8Z,11Z,14Z))	C43H78NO8P	522318	744388	823545	371994	599088	604536	annotated
9889531	552	PE(18:1(9Z)/20:3(5Z,8Z,11Z))	C43H78NO8P	522318	744388	823545	371994	599088	604536	annotated
9889532	552	PE(18:1(9Z)/20:3(8Z,11Z,14Z))	C43H78NO8P	522318	744388	823545	371994	599088	604536	annotated
9889533	552	PE(18:0/20:4(5Z,8Z,11Z,14Z))	C43H78NO8P	522318	744388	823545	371994	599088	604536	annotated
9889534	552	PE(18:0/20:4(8Z,11Z,14Z,17Z))	C43H78NO8P	522318	744388	823545	371994	599088	604536	annotated
9889535	552	PE(18:4(6Z,9Z,12Z,15Z)/20:0)	C43H78NO8P	522318	744388	823545	371994	599088	604536	annotated
9889536	552	PE(18:3(9Z,12Z,15Z)/20:1(11Z))	C43H78NO8P	522318	744388	823545	371994	599088	604536	annotated
9889537	552	PE(18:3(6Z,9Z,12Z)/20:1(11Z))	C43H78NO8P	522318	744388	823545	371994	599088	604536	annotated
9889538	552	PE(16:0/22:4(7Z,10Z,13Z,16Z))	C43H78NO8P	522318	744388	823545	371994	599088	604536	annotated
9889539	552	PE(16:1(9Z)/20:3(8Z,11Z,14Z))	C43H78NO8P	522318	744388	823545	371994	599088	604536	annotated
9889540	552	PC(20:4(5Z,8Z,11Z,14Z)/15:0)	C43H78NO8P	522318	744388	823545	371994	599088	604536	annotated
9889541	552	PC(20:4(8Z,11Z,14Z,17Z)/15:0)	C43H78NO8P	522318	744388	823545	371994	599088	604536	annotated
9889542	552	PC(15:0/20:4(8Z,11Z,14Z,17Z))	C43H78NO8P	522318	744388	823545	371994	599088	604536	annotated
9889543	552	PC(15:0/20:4(5Z,8Z,11Z,14Z))	C43H78NO8P	522318	744388	823545	371994	599088	604536	annotated
9889556	552	PE(P-18:0/20:4(6E,8Z,11Z,14Z)(5OH[S]))	C43H78NO8P	522318	744388	823545	371994	599088	604536	annotated
9889557	552	PE(P-18:0/20:4(5Z,8Z,11Z,13E)(15OH[S]))	C43H78NO8P	522318	744388	823545	371994	599088	604536	annotated
9889558	552	PE(P-18:0/20:4(5Z,8Z,10E,14Z)(12OH[S]))	C43H78NO8P	522318	744388	823545	371994	599088	604536	annotated
9889559	552	PC(22:4(7Z,10Z,13Z,16Z)/13:0)	C43H78NO8P	522318	744388	823545	371994	599088	604536	annotated
9889560	552	PC(18:2(9Z,12E)/17:2(9Z,11E))	C43H78NO8P	522318	744388	823545	371994	599088	604536	annotated
9889561	552	PC(13:0/22:4(7Z,10Z,13Z,16Z))	C43H78NO8P	522318	744388	823545	371994	599088	604536	annotated
9889562	552	PC(17:1(9Z)/18:3(9Z,12Z,15Z))	C43H78NO8P	522318	744388	823545	371994	599088	604536	annotated
9889563	552	PC(17:1(9Z)/18:3(6Z,9Z,12Z))	C43H78NO8P	522318	744388	823545	371994	599088	604536	annotated
9889564	552	PC(17:0/18:4(6Z,9Z,12Z,15Z))	C43H78NO8P	522318	744388	823545	371994	599088	604536	annotated
9889565	552	PC(17:2(9Z,12Z)/18:2(9Z,12Z))	C43H78NO8P	522318	744388	823545	371994	599088	604536	annotated
9889566	552	PC(15:1(9Z)/20:3(8Z,11Z,14Z))	C43H78NO8P	522318	744388	823545	371994	599088	604536	annotated
9889567	552	PE(18:0/20:4(5E,8E,11E,14E))	C43H78NO8P	522318	744388	823545	371994	599088	604536	annotated
9889568	552	PC(18:4(6Z,9Z,12Z,15Z)/17:0)	C43H78NO8P	522318	744388	823545	371994	599088	604536	annotated
9889569	552	PC(18:3(6Z,9Z,12Z)/17:1(9Z))	C43H78NO8P	522318	744388	823545	371994	599088	604536	annotated
9889570	552	PC(18:2(9Z,12Z)/17:2(9Z,12Z))	C43H78NO8P	522318	744388	823545	371994	599088	604536	annotated
9889571	552	PC(18:3(9Z,12Z,15Z)/17:1(9Z))	C43H78NO8P	522318	744388	823545	371994	599088	604536	annotated
9889572	552	PC(20:3(8Z,11Z,14Z)/15:1(9Z))	C43H78NO8P	522318	744388	823545	371994	599088	604536	annotated
9889573	553	PE(22:6(4Z,7Z,10Z,13Z,16Z,19Z)/P-18:1(11Z))	C45H76NO7P	52266.5	62599.6	73651.5	43645	81424.9	65903.4	annotated
9889574	553	PE(22:6(4Z,7Z,10Z,13Z,16Z,19Z)/P-18:1(9Z))	C45H76NO7P	52266.5	62599.6	73651.5	43645	81424.9	65903.4	annotated
9889575	553	PE(P-18:1(11Z)/22:6(4Z,7Z,10Z,13Z,16Z,19Z))	C45H76NO7P	52266.5	62599.6	73651.5	43645	81424.9	65903.4	annotated
9889576	553	PE(P-18:1(9Z)/22:6(4Z,7Z,10Z,13Z,16Z,19Z))	C45H76NO7P	52266.5	62599.6	73651.5	43645	81424.9	65903.4	annotated
9889578	553	1-(8-[3]-ladderane-octanoyl)-2-(8-[3]-ladderane-octanyl)-sn-glycerophosphoethanolamine	C45H76NO7P	52266.5	62599.6	73651.5	43645	81424.9	65903.4	annotated
9889636	556	Cohibin C	C37H68O4	306290	511353	422955	336220	354699	339373	annotated
9889637	556	Cohibin D	C37H68O4	306290	511353	422955	336220	354699	339373	annotated
9889640	557	PS(16:1(9Z)/18:0)	C40H76NO10P	386678	578002	495991	358853	443386	419374	annotated
9889641	557	PS(18:0/16:1(9Z))	C40H76NO10P	386678	578002	495991	358853	443386	419374	annotated
9889642	557	PS(18:1(9Z)/16:0)	C40H76NO10P	386678	578002	495991	358853	443386	419374	annotated
9889643	557	PS(16:0/18:1(9Z))	C40H76NO10P	386678	578002	495991	358853	443386	419374	annotated
9889644	557	1-Hexadecanoyl-2-(9Z-octadecenoyl)-sn-glycero-3-phosphoserine	C40H76NO10P	386678	578002	495991	358853	443386	419374	annotated
9889645	557	PS(16:0/18:1(11Z))	C40H76NO10P	386678	578002	495991	358853	443386	419374	annotated
9889646	557	PS(12:0/22:1(11Z))	C40H76NO10P	386678	578002	495991	358853	443386	419374	annotated
9889647	557	PS(14:0/20:1(11Z))	C40H76NO10P	386678	578002	495991	358853	443386	419374	annotated
9889648	557	PS(14:1(9Z)/20:0)	C40H76NO10P	386678	578002	495991	358853	443386	419374	annotated
9889649	557	PS(15:0/19:1(9Z))	C40H76NO10P	386678	578002	495991	358853	443386	419374	annotated
9889650	557	PS(15:1(9Z)/19:0)	C40H76NO10P	386678	578002	495991	358853	443386	419374	annotated
9889651	557	PS(17:0/17:1(9Z))	C40H76NO10P	386678	578002	495991	358853	443386	419374	annotated
9889652	557	PS(17:1(9Z)/17:0)	C40H76NO10P	386678	578002	495991	358853	443386	419374	annotated
9889653	557	PS(19:0/15:1(9Z))	C40H76NO10P	386678	578002	495991	358853	443386	419374	annotated
9889654	557	PS(19:1(9Z)/15:0)	C40H76NO10P	386678	578002	495991	358853	443386	419374	annotated
9889655	557	PS(20:0/14:1(9Z))	C40H76NO10P	386678	578002	495991	358853	443386	419374	annotated
9889656	557	PS(20:1(11Z)/14:0)	C40H76NO10P	386678	578002	495991	358853	443386	419374	annotated
9889657	557	PS(22:1(11Z)/12:0)	C40H76NO10P	386678	578002	495991	358853	443386	419374	annotated
9889692	563	PI(22:1(11Z)/14:0)	C45H85O13P	66749.1	59830.1	54545.7	64702.1	58821.1	57519.7	annotated
9889693	563	PI(22:0/14:1(9Z))	C45H85O13P	66749.1	59830.1	54545.7	64702.1	58821.1	57519.7	annotated
9889694	563	PI(21:0/15:1(9Z))	C45H85O13P	66749.1	59830.1	54545.7	64702.1	58821.1	57519.7	annotated
9889695	563	PI(20:1(11Z)/16:0)	C45H85O13P	66749.1	59830.1	54545.7	64702.1	58821.1	57519.7	annotated
9889696	563	PI(19:1(9Z)/17:0)	C45H85O13P	66749.1	59830.1	54545.7	64702.1	58821.1	57519.7	annotated
9889697	563	PI(19:0/17:1(9Z))	C45H85O13P	66749.1	59830.1	54545.7	64702.1	58821.1	57519.7	annotated
9889698	563	PI(20:0/16:1(9Z))	C45H85O13P	66749.1	59830.1	54545.7	64702.1	58821.1	57519.7	annotated
9889699	563	PI(17:0/19:1(9Z))	C45H85O13P	66749.1	59830.1	54545.7	64702.1	58821.1	57519.7	annotated
9889700	563	PI(17:1(9Z)/19:0)	C45H85O13P	66749.1	59830.1	54545.7	64702.1	58821.1	57519.7	annotated
9889701	563	PI(14:1(9Z)/22:0)	C45H85O13P	66749.1	59830.1	54545.7	64702.1	58821.1	57519.7	annotated
9889702	563	PI(16:1(9Z)/20:0)	C45H85O13P	66749.1	59830.1	54545.7	64702.1	58821.1	57519.7	annotated
9889703	563	PI(15:1(9Z)/21:0)	C45H85O13P	66749.1	59830.1	54545.7	64702.1	58821.1	57519.7	annotated
9889704	563	PI(14:0/22:1(11Z))	C45H85O13P	66749.1	59830.1	54545.7	64702.1	58821.1	57519.7	annotated
9889705	563	PI(18:0/18:1(9Z))	C45H85O13P	66749.1	59830.1	54545.7	64702.1	58821.1	57519.7	annotated
9889706	563	PI(18:1(9Z)/18:0)	C45H85O13P	66749.1	59830.1	54545.7	64702.1	58821.1	57519.7	annotated
9889707	563	PI(16:0/20:1(11Z))	C45H85O13P	66749.1	59830.1	54545.7	64702.1	58821.1	57519.7	annotated
9889708	565	PG(18:1(9Z)/18:0)	C42H81O10P	14370.3	15496.6	15924.3	5249.68	7054.25	17277.6	annotated
9889709	565	PG(18:0/18:1(9Z))	C42H81O10P	14370.3	15496.6	15924.3	5249.68	7054.25	17277.6	annotated
9889710	565	PG(18:0/18:1(11Z))	C42H81O10P	14370.3	15496.6	15924.3	5249.68	7054.25	17277.6	annotated
9889711	565	PG(18:1(11Z)/18:0)	C42H81O10P	14370.3	15496.6	15924.3	5249.68	7054.25	17277.6	annotated
9889712	565	PG(21:0/15:1(9Z))	C42H81O10P	14370.3	15496.6	15924.3	5249.68	7054.25	17277.6	annotated
9889713	565	PG(22:0/14:1(9Z))	C42H81O10P	14370.3	15496.6	15924.3	5249.68	7054.25	17277.6	annotated
9889714	565	PG(22:1(11Z)/14:0)	C42H81O10P	14370.3	15496.6	15924.3	5249.68	7054.25	17277.6	annotated
9889715	565	PG(16:0/20:1(11Z))	C42H81O10P	14370.3	15496.6	15924.3	5249.68	7054.25	17277.6	annotated
9889716	565	PG(17:1(9Z)/19:0)	C42H81O10P	14370.3	15496.6	15924.3	5249.68	7054.25	17277.6	annotated
9889717	565	PG(17:0/19:1(9Z))	C42H81O10P	14370.3	15496.6	15924.3	5249.68	7054.25	17277.6	annotated
9889718	565	PG(16:1(9Z)/20:0)	C42H81O10P	14370.3	15496.6	15924.3	5249.68	7054.25	17277.6	annotated
9889719	565	PG(19:1(9Z)/17:0)	C42H81O10P	14370.3	15496.6	15924.3	5249.68	7054.25	17277.6	annotated
9889720	565	PG(19:0/17:1(9Z))	C42H81O10P	14370.3	15496.6	15924.3	5249.68	7054.25	17277.6	annotated
9889721	565	PG(20:1(11Z)/16:0)	C42H81O10P	14370.3	15496.6	15924.3	5249.68	7054.25	17277.6	annotated
9889722	565	PG(20:0/16:1(9Z))	C42H81O10P	14370.3	15496.6	15924.3	5249.68	7054.25	17277.6	annotated
9889723	565	PG(14:1(9Z)/22:0)	C42H81O10P	14370.3	15496.6	15924.3	5249.68	7054.25	17277.6	annotated
9889724	565	PG(14:0/22:1(11Z))	C42H81O10P	14370.3	15496.6	15924.3	5249.68	7054.25	17277.6	annotated
9889725	565	PG(15:1(9Z)/21:0)	C42H81O10P	14370.3	15496.6	15924.3	5249.68	7054.25	17277.6	annotated
9889726	566	PG(P-16:0/20:3(8Z,11Z,14Z))	C42H77O9P	6221.83	6575.11	4679.26	5454.36	6937.82	5120.43	annotated
9889727	566	PG(P-18:0/18:3(6Z,9Z,12Z))	C42H77O9P	6221.83	6575.11	4679.26	5454.36	6937.82	5120.43	annotated
9889728	566	PG(P-18:0/18:3(9Z,12Z,15Z))	C42H77O9P	6221.83	6575.11	4679.26	5454.36	6937.82	5120.43	annotated
9889729	566	PG(O-16:0/20:4(5Z,8Z,11Z,14Z))	C42H77O9P	6221.83	6575.11	4679.26	5454.36	6937.82	5120.43	annotated
9889730	566	PG(O-18:0/18:4(6Z,9Z,12Z,15Z))	C42H77O9P	6221.83	6575.11	4679.26	5454.36	6937.82	5120.43	annotated
9889731	568	PG(P-16:0/18:2(9Z,12Z))	C40H75O9P	3432.07	0	0	0	0	0	annotated
9889732	568	PG(O-16:0/18:3(9Z,12Z,15Z))	C40H75O9P	3432.07	0	0	0	0	0	annotated
9889733	568	PG(O-16:0/18:3(6Z,9Z,12Z))	C40H75O9P	3432.07	0	0	0	0	0	annotated
9889734	570	PG(18:3(6Z,9Z,12Z)/18:1(9Z))	C42H75O10P	6271.73	8528.71	5957.74	8815.52	9363.67	6393.62	annotated
9889735	570	PG(18:3(6Z,9Z,12Z)/18:1(11Z))	C42H75O10P	6271.73	8528.71	5957.74	8815.52	9363.67	6393.62	annotated
9889736	570	PG(18:3(9Z,12Z,15Z)/18:1(9Z))	C42H75O10P	6271.73	8528.71	5957.74	8815.52	9363.67	6393.62	annotated
9889737	570	PG(18:3(9Z,12Z,15Z)/18:1(11Z))	C42H75O10P	6271.73	8528.71	5957.74	8815.52	9363.67	6393.62	annotated
9889738	570	PG(18:1(11Z)/18:3(6Z,9Z,12Z))	C42H75O10P	6271.73	8528.71	5957.74	8815.52	9363.67	6393.62	annotated
9889739	570	PG(18:1(11Z)/18:3(9Z,12Z,15Z))	C42H75O10P	6271.73	8528.71	5957.74	8815.52	9363.67	6393.62	annotated
9889740	570	PG(18:1(9Z)/18:3(9Z,12Z,15Z))	C42H75O10P	6271.73	8528.71	5957.74	8815.52	9363.67	6393.62	annotated
9889742	570	PG(18:1(9Z)/18:3(6Z,9Z,12Z))	C42H75O10P	6271.73	8528.71	5957.74	8815.52	9363.67	6393.62	annotated
9889743	570	PG(18:2(9Z,12Z)/18:2(9Z,12Z))	C42H75O10P	6271.73	8528.71	5957.74	8815.52	9363.67	6393.62	annotated
9889748	570	PG(16:0/20:4(5Z,8Z,11Z,14Z))	C42H75O10P	6271.73	8528.71	5957.74	8815.52	9363.67	6393.62	annotated
9889750	570	PG(16:1(9Z)/20:3(8Z,11Z,14Z))	C42H75O10P	6271.73	8528.71	5957.74	8815.52	9363.67	6393.62	annotated
9889751	570	PG(16:1(9Z)/20:3(5Z,8Z,11Z))	C42H75O10P	6271.73	8528.71	5957.74	8815.52	9363.67	6393.62	annotated
9889754	570	PG(18:0/18:4(6Z,9Z,12Z,15Z))	C42H75O10P	6271.73	8528.71	5957.74	8815.52	9363.67	6393.62	annotated
9889755	570	PG(20:4(5Z,8Z,11Z,14Z)/16:0)	C42H75O10P	6271.73	8528.71	5957.74	8815.52	9363.67	6393.62	annotated
9889756	570	PG(22:4(7Z,10Z,13Z,16Z)/14:0)	C42H75O10P	6271.73	8528.71	5957.74	8815.52	9363.67	6393.62	annotated
9889760	570	PG(20:3(8Z,11Z,14Z)/16:1(9Z))	C42H75O10P	6271.73	8528.71	5957.74	8815.52	9363.67	6393.62	annotated
9889763	570	PG(18:4(6Z,9Z,12Z,15Z)/18:0)	C42H75O10P	6271.73	8528.71	5957.74	8815.52	9363.67	6393.62	annotated
9889769	570	PG(14:0/22:4(7Z,10Z,13Z,16Z))	C42H75O10P	6271.73	8528.71	5957.74	8815.52	9363.67	6393.62	annotated
9889776	572	Oxidized glutathione	C20H32N6O12S2	187177	369218	337086	157821	245879	187297	annotated+fragment
9889777	572	Glutathione disulfide	C20H32N6O12S2	187177	369218	337086	157821	245879	187297	identified+fragment
9889839	579	Nutriacholic acid	C24H38O4	278444	327649	382147	332795	534733	458393	annotated
9889840	579	7-Hydroxy-3-oxocholanoic acid	C24H38O4	278444	327649	382147	332795	534733	458393	annotated
9889841	579	7a-Hydroxy-3-oxo-5b-cholanoic acid	C24H38O4	278444	327649	382147	332795	534733	458393	annotated
9889842	579	3alpha-Hydroxy-12-oxo-5beta-cholan-24-oic Acid	C24H38O4	278444	327649	382147	332795	534733	458393	annotated
9889843	579	9'-Carboxy-alpha-chromanol	C24H38O4	278444	327649	382147	332795	534733	458393	annotated
9889844	579	D8'-Merulinic acid A	C24H38O4	278444	327649	382147	332795	534733	458393	annotated
9889845	579	12alpha-hydroxy-3-oxo-5beta-cholan-24-oic Acid	C24H38O4	278444	327649	382147	332795	534733	458393	annotated
9889846	579	3alpha,12alpha-Dihydroxy-5beta-chol-6-en-24-oic Acid	C24H38O4	278444	327649	382147	332795	534733	458393	annotated
9889847	579	Diisooctyl phthalate	C24H38O4	278444	327649	382147	332795	534733	458393	annotated
9889848	579	Di-n-octyl phthalate	C24H38O4	278444	327649	382147	332795	534733	458393	annotated
9889849	579	Bis(2-ethylhexyl)phthalate	C24H38O4	278444	327649	382147	332795	534733	458393	annotated
9889850	579	Apocholic acid	C24H38O4	278444	327649	382147	332795	534733	458393	annotated
9889851	579	3alpha-Hydroxy-7-oxo-5alpha-cholan-24-oic Acid	C24H38O4	278444	327649	382147	332795	534733	458393	annotated
9889852	579	3beta,19-Dihydroxychol-5-en-24-oic Acid	C24H38O4	278444	327649	382147	332795	534733	458393	annotated
9889853	579	3alpha,7alpha-Dihydroxy-5beta-chol-16-en-24-oic Acid	C24H38O4	278444	327649	382147	332795	534733	458393	annotated
9889854	579	(22E)-3alpha,7beta-Dihydroxy-5beta-chol-22-en-24-oic Acid	C24H38O4	278444	327649	382147	332795	534733	458393	annotated
9889855	579	3alpha,12alpha-Dihydroxy-5beta-chol-7-en-24-oic Acid	C24H38O4	278444	327649	382147	332795	534733	458393	annotated
9889856	579	3alpha,12beta-Dihydroxy-5beta-chol-6-en-24-oic Acid	C24H38O4	278444	327649	382147	332795	534733	458393	annotated
9889857	579	3alpha,12alpha-Dihydroxy-5beta-chol-8-en-24-oic Acid	C24H38O4	278444	327649	382147	332795	534733	458393	annotated
9889858	579	7alpha,12alpha-Dihydroxy-5beta-chol-3-en-24-oic Acid	C24H38O4	278444	327649	382147	332795	534733	458393	annotated
9889859	579	3alpha,12alpha-Dihydroxy-5beta-chol-9(11)-en-24-oic Acid	C24H38O4	278444	327649	382147	332795	534733	458393	annotated
9889860	579	(22E)-3alpha,7alpha-Dihydroxy-5beta-chol-22-en-24-oic Acid	C24H38O4	278444	327649	382147	332795	534733	458393	annotated
9889861	579	3beta,12alpha-Dihydroxychol-5-en-24-oic Acid	C24H38O4	278444	327649	382147	332795	534733	458393	annotated
9889862	579	3beta,7beta-Dihydroxychol-5-en-24-oic Acid	C24H38O4	278444	327649	382147	332795	534733	458393	annotated
9889863	579	3beta,6beta-Dihydroxychol-4-en-24-oic Acid	C24H38O4	278444	327649	382147	332795	534733	458393	annotated
9889864	579	3beta,7alpha-Dihydroxychol-5-en-24-oic Acid	C24H38O4	278444	327649	382147	332795	534733	458393	annotated
9889865	579	3beta,7alpha-Dihydroxychol-4-en-24-oic Acid	C24H38O4	278444	327649	382147	332795	534733	458393	annotated
9889866	579	1alpha-Hydroxy-3-oxo-5beta-cholan-24-oic Acid	C24H38O4	278444	327649	382147	332795	534733	458393	annotated
9889867	579	(22E)-3alpha,12alpha-Dihydroxy-5beta-chol-22-en-24-oic Acid	C24H38O4	278444	327649	382147	332795	534733	458393	annotated
9889868	579	3alpha,7beta-Dihydroxy-5beta-chol-11-en-24-oic Acid	C24H38O4	278444	327649	382147	332795	534733	458393	annotated
9889869	579	3alpha,7beta-Dihydroxychol-5-en-24-oic Acid	C24H38O4	278444	327649	382147	332795	534733	458393	annotated
9889870	579	3alpha,7alpha-Dihydroxy-5beta-chol-11-en-24-oic Acid	C24H38O4	278444	327649	382147	332795	534733	458393	annotated
9889871	579	3alpha,7alpha-Dihydroxychol-5-en-24-oic Acid	C24H38O4	278444	327649	382147	332795	534733	458393	annotated
9889872	579	3alpha,12alpha-Dihydroxy-5beta-chol-14-en-24-oic Acid	C24H38O4	278444	327649	382147	332795	534733	458393	annotated
9889873	579	3alpha-Hydroxy-12-oxo-5alpha-cholan-24-oic Acid	C24H38O4	278444	327649	382147	332795	534733	458393	annotated
9889874	579	3alpha,12beta-Dihydroxy-5beta-chol-9(11)-en-24-oic Acid	C24H38O4	278444	327649	382147	332795	534733	458393	annotated
9889875	579	12alpha-Hydroxy-7-oxo-5beta-cholan-24-oic Acid	C24H38O4	278444	327649	382147	332795	534733	458393	annotated
9889876	579	7alpha,12alpha-Dihydroxy-5beta-chol-2-en-24-oic Acid	C24H38O4	278444	327649	382147	332795	534733	458393	annotated
9889877	579	3beta-Hydroxy-6-oxo-5beta-cholan-24-oic Acid	C24H38O4	278444	327649	382147	332795	534733	458393	annotated
9889878	579	3alpha-Hydroxy-6-oxo-5beta-cholan-24-oic Acid	C24H38O4	278444	327649	382147	332795	534733	458393	annotated
9889879	579	3beta-Hydroxy-6-oxo-5alpha-cholan-24-oic Acid	C24H38O4	278444	327649	382147	332795	534733	458393	annotated
9889880	579	3alpha-Hydroxy-6-oxo-5alpha-cholan-24-oic Acid	C24H38O4	278444	327649	382147	332795	534733	458393	annotated
9889881	579	12alpha-Hydroxy-7-oxo-5alpha-cholan-24-oic Acid	C24H38O4	278444	327649	382147	332795	534733	458393	annotated
9889882	579	7beta-Hydroxy-12-oxo-5alpha-cholan-24-oic Acid	C24H38O4	278444	327649	382147	332795	534733	458393	annotated
9889883	579	7alpha-Hydroxy-12-oxo-5alpha-cholan-24-oic Acid	C24H38O4	278444	327649	382147	332795	534733	458393	annotated
9889884	579	12alpha-Hydroxy-3-oxo-5alpha-cholan-24-oic Acid	C24H38O4	278444	327649	382147	332795	534733	458393	annotated
9889885	579	7alpha-Hydroxy-3-oxo-5beta-cholan-24-oic Acid	C24H38O4	278444	327649	382147	332795	534733	458393	annotated
9889886	579	6alpha-Hydroxy-3-oxo-5alpha-cholan-24-oic Acid	C24H38O4	278444	327649	382147	332795	534733	458393	annotated
9889887	579	7alpha-Hydroxy-3-oxo-5alpha-cholan-24-oic Acid	C24H38O4	278444	327649	382147	332795	534733	458393	annotated
9889888	579	7beta-Hydroxy-3-oxo-5beta-cholan-24-oic Acid	C24H38O4	278444	327649	382147	332795	534733	458393	annotated
9889889	579	7beta-Hydroxy-12-oxo-5beta-cholan-24-oic Acid	C24H38O4	278444	327649	382147	332795	534733	458393	annotated
9889890	579	7alpha-Hydroxy-12-oxo-5beta-cholan-24-oic Acid	C24H38O4	278444	327649	382147	332795	534733	458393	annotated
9889891	579	3beta-Hydroxy-12-oxo-5beta-cholan-24-oic Acid	C24H38O4	278444	327649	382147	332795	534733	458393	annotated
9889892	579	6alpha-Hydroxy-3-oxo-5beta-cholan-24-oic Acid	C24H38O4	278444	327649	382147	332795	534733	458393	annotated
9889893	579	12beta-Hydroxy-3-oxo-5beta-cholan-24-oic Acid	C24H38O4	278444	327649	382147	332795	534733	458393	annotated
9889894	579	6beta-Hydroxy-3-oxo-5beta-cholan-24-oic Acid	C24H38O4	278444	327649	382147	332795	534733	458393	annotated
9889895	579	3alpha-Hydroxy-7-oxo-5beta-cholan-24-oic Acid	C24H38O4	278444	327649	382147	332795	534733	458393	annotated
9889896	579	3beta-Hydroxy-7-oxo-5alpha-cholan-24-oic Acid	C24H38O4	278444	327649	382147	332795	534733	458393	annotated
9889897	579	3beta-Hydroxy-7-oxo-5beta-cholan-24-oic Acid	C24H38O4	278444	327649	382147	332795	534733	458393	annotated
9889898	579	3beta-Hydroxy-11-oxo-5beta-cholan-24-oic Acid	C24H38O4	278444	327649	382147	332795	534733	458393	annotated
9889899	579	3alpha-Hydroxy-11-oxo-5beta-cholan-24-oic Acid	C24H38O4	278444	327649	382147	332795	534733	458393	annotated
9889900	580	PC(dm18:1(11Z)/20:4(8Z,11Z,14Z,17Z))	C46H82NO7P	141115	134294	165521	145852	235753	211344	annotated
9889901	580	PC(P-18:1(11Z)/20:4(5Z,8Z,11Z,14Z))	C46H82NO7P	141115	134294	165521	145852	235753	211344	annotated
9889902	580	PC(P-18:0/20:5(5Z,8Z,11Z,14Z,17Z))	C46H82NO7P	141115	134294	165521	145852	235753	211344	annotated
9889903	580	PC(P-16:0/22:5(4Z,7Z,10Z,13Z,16Z))	C46H82NO7P	141115	134294	165521	145852	235753	211344	annotated
9889904	580	PC(P-16:0/22:5(7Z,10Z,13Z,16Z,19Z))	C46H82NO7P	141115	134294	165521	145852	235753	211344	annotated
9889905	580	PC(P-18:1(9Z)/20:4(5Z,8Z,11Z,14Z))	C46H82NO7P	141115	134294	165521	145852	235753	211344	annotated
9889906	580	PC(P-18:1(9Z)/20:4(8Z,11Z,14Z,17Z))	C46H82NO7P	141115	134294	165521	145852	235753	211344	annotated
9889907	580	2-O-(4,7,10,13,16,19-Docosahexaenoyl)-1-O-hexadecylglycero-3-phosphocholine	C46H82NO7P	141115	134294	165521	145852	235753	211344	annotated
9889908	580	PC(20:5(5Z,8Z,11Z,14Z,17Z)/P-18:0)	C46H82NO7P	141115	134294	165521	145852	235753	211344	annotated
9889909	580	PC(20:4(5Z,8Z,11Z,14Z)/P-18:1(9Z))	C46H82NO7P	141115	134294	165521	145852	235753	211344	annotated
9889910	580	PC(20:4(5Z,8Z,11Z,14Z)/P-18:1(11Z))	C46H82NO7P	141115	134294	165521	145852	235753	211344	annotated
9889911	580	PC(20:4(8Z,11Z,14Z,17Z)/P-18:1(9Z))	C46H82NO7P	141115	134294	165521	145852	235753	211344	annotated
9889912	580	PC(20:4(8Z,11Z,14Z,17Z)/P-18:1(11Z))	C46H82NO7P	141115	134294	165521	145852	235753	211344	annotated
9889913	580	PC(22:5(7Z,10Z,13Z,16Z,19Z)/P-16:0)	C46H82NO7P	141115	134294	165521	145852	235753	211344	annotated
9889914	580	PC(22:5(4Z,7Z,10Z,13Z,16Z)/P-16:0)	C46H82NO7P	141115	134294	165521	145852	235753	211344	annotated
9889915	580	PC(O-16:0/22:6(4Z,7Z,10Z,13Z,16Z,19Z))	C46H82NO7P	141115	134294	165521	145852	235753	211344	annotated
9889916	580	PC(20:4(5Z,8Z,11Z,14Z)/P-18:1(9Z))	C46H82NO7P	141115	134294	165521	145852	235753	211344	annotated
9889917	580	PC(20:4(5Z,8Z,11Z,14Z)/P-18:1(11Z))	C46H82NO7P	141115	134294	165521	145852	235753	211344	annotated
9889918	581	PC(P-18:1(11Z)/20:2(11Z,14Z))	C46H86NO7P	84117.1	118352	127853	102244	135733	136823	annotated
9889920	581	PC(P-18:0/20:3(5Z,8Z,11Z))	C46H86NO7P	84117.1	118352	127853	102244	135733	136823	annotated
9889921	581	PC(P-18:0/20:3(8Z,11Z,14Z))	C46H86NO7P	84117.1	118352	127853	102244	135733	136823	annotated
9889923	581	PC(P-18:1(9Z)/20:2(11Z,14Z))	C46H86NO7P	84117.1	118352	127853	102244	135733	136823	annotated
9889924	581	PC(20:2(11Z,14Z)/P-18:1(9Z))	C46H86NO7P	84117.1	118352	127853	102244	135733	136823	annotated
9889925	581	PC(20:2(11Z,14Z)/P-18:1(11Z))	C46H86NO7P	84117.1	118352	127853	102244	135733	136823	annotated
9889926	581	PC(20:3(5Z,8Z,11Z)/P-18:0)	C46H86NO7P	84117.1	118352	127853	102244	135733	136823	annotated
9889927	581	PC(20:3(8Z,11Z,14Z)/P-18:0)	C46H86NO7P	84117.1	118352	127853	102244	135733	136823	annotated
9889931	581	PC(O-18:0/20:4(5Z,8Z,11Z,14Z))	C46H86NO7P	84117.1	118352	127853	102244	135733	136823	annotated
9889933	581	PC(20:3(8Z,11Z,14Z)/P-18:0)	C46H86NO7P	84117.1	118352	127853	102244	135733	136823	annotated
9889934	581	PC(20:3(5Z,8Z,11Z)/P-18:0)	C46H86NO7P	84117.1	118352	127853	102244	135733	136823	annotated
9889935	581	PC(20:2(11Z,14Z)/P-18:1(11Z))	C46H86NO7P	84117.1	118352	127853	102244	135733	136823	annotated
9889936	581	PC(20:2(11Z,14Z)/P-18:1(9Z))	C46H86NO7P	84117.1	118352	127853	102244	135733	136823	annotated
9889939	581	PC(O-20:0/18:4(6Z,9Z,12Z,15Z))	C46H86NO7P	84117.1	118352	127853	102244	135733	136823	annotated
9889940	581	PC(O-18:0/20:4(8Z,11Z,14Z,17Z))	C46H86NO7P	84117.1	118352	127853	102244	135733	136823	annotated
9889943	581	PC(O-18:0/20:4(5E,8E,11E,14E))	C46H86NO7P	84117.1	118352	127853	102244	135733	136823	annotated
9889944	581	PC(O-16:0/22:4(7Z,10Z,13Z,16Z))	C46H86NO7P	84117.1	118352	127853	102244	135733	136823	annotated
9889949	581	PC(P-20:0/18:3(9Z,12Z,15Z))	C46H86NO7P	84117.1	118352	127853	102244	135733	136823	annotated
9889950	581	PC(P-20:0/18:3(6Z,9Z,12Z))	C46H86NO7P	84117.1	118352	127853	102244	135733	136823	annotated
9889953	582	PG(21:0/18:0)	C45H89O10P	17767.5	25060.7	25899.6	29364.5	42702.6	36136	annotated
9889954	582	PG(22:0/17:0)	C45H89O10P	17767.5	25060.7	25899.6	29364.5	42702.6	36136	annotated
9889955	582	PG(18:0/21:0)	C45H89O10P	17767.5	25060.7	25899.6	29364.5	42702.6	36136	annotated
9889956	582	PG(17:0/22:0)	C45H89O10P	17767.5	25060.7	25899.6	29364.5	42702.6	36136	annotated
9889957	582	PG(19:0/20:0)	C45H89O10P	17767.5	25060.7	25899.6	29364.5	42702.6	36136	annotated
9889958	582	PG(20:0/19:0)	C45H89O10P	17767.5	25060.7	25899.6	29364.5	42702.6	36136	annotated
9889960	583	8-Oxo-dGTP	C10H16N5O14P3	316149	781914	670557	154192	468758	403342	annotated
9889961	583	GTP	C10H16N5O14P3	316149	781914	670557	154192	468758	403342	annotated
9889962	583	8-Oxo-dGTP	C10H16N5O14P3	316149	781914	670557	154192	468758	403342	annotated
9889970	601	Netilmicin	C21H41N5O7	30687.4	49883.3	37347.6	34704.9	30690.6	31352.4	annotated
9889971	601	Netilmicin	C21H41N5O7	30687.4	49883.3	37347.6	34704.9	30690.6	31352.4	annotated
9890002	606	Cysteinyl-Proline	C8H14N2O3S	518031	640664	708600	357222	362267	305758	annotated
9890006	606	Prolyl-Cysteine	C8H14N2O3S	518031	640664	708600	357222	362267	305758	annotated
9890008	606	Pyrene-4,5-oxide	C16H10O	518031	640664	708600	357222	362267	305758	annotated
9890009	606	Pyrene-1,2-oxide	C16H10O	518031	640664	708600	357222	362267	305758	annotated
9890010	606	2-Hydroxypyrene	C16H10O	518031	640664	708600	357222	362267	305758	annotated
9890013	606	1-Hydroxypyrene	C16H10O	518031	640664	708600	357222	362267	305758	annotated
9890015	607	UDP-N-acetyl-alpha-D-glucosamine	C17H27N3O17P2	221112	414729	315148	333634	697218	556208	annotated+fragment
9890017	607	Uridine diphosphate-N-acetylgalactosamine	C17H27N3O17P2	221112	414729	315148	333634	697218	556208	annotated+fragment
9890019	607	UDP-N-acetyl-alpha-D-galactosamine	C17H27N3O17P2	221112	414729	315148	333634	697218	556208	annotated+fragment
9890021	607	UDP-N-acetyl-D-mannosamine	C17H27N3O17P2	221112	414729	315148	333634	697218	556208	annotated+fragment
9890023	607	UDP-N-acetyl-D-galactosamine	C17H27N3O17P2	221112	414729	315148	333634	697218	556208	annotated+fragment
9890025	607	UDP-N-acetyl-D-mannosamine	C17H27N3O17P2	221112	414729	315148	333634	697218	556208	annotated+fragment
9890026	607	UDP-GlcNAc	C17H27N3O17P2	221112	414729	315148	333634	697218	556208	annotated+fragment
9890027	609	Indoleacrylic acid	C11H9NO2	91594.7	330806	429148	130869	522600	508681	annotated
9890037	614	N-Desalkyl flurazepam	C15H10ClFN2O	6579.68	11592	14350.7	9039.13	22139	21266	annotated
9890054	619	L-homoserine	C4H9NO3	155323	550788	430057	127401	569378	531488	identified+fragment
9890055	619	L-Threonine	C4H9NO3	155323	550788	430057	127401	569378	531488	identified+fragment
9890056	619	L-Allothreonine	C4H9NO3	155323	550788	430057	127401	569378	531488	annotated+fragment
9890057	619	4-Amino-3-hydroxybutanoate	C4H9NO3	155323	550788	430057	127401	569378	531488	annotated+fragment
9890058	619	Hydroxyethyl glycine	C4H9NO3	155323	550788	430057	127401	569378	531488	annotated+fragment
9890059	619	D-Threonine	C4H9NO3	155323	550788	430057	127401	569378	531488	annotated+fragment
9890060	619	(-)-erythro-(2R,3R)-Dihydroxybutylamide	C4H9NO3	155323	550788	430057	127401	569378	531488	annotated+fragment
9890061	619	D-Allothreonine	C4H9NO3	155323	550788	430057	127401	569378	531488	annotated+fragment
9890062	619	2-Methylserine	C4H9NO3	155323	550788	430057	127401	569378	531488	annotated+fragment
9890069	623	Gamma-glutamyl-Gamma-glutamate	C10H18N4O5	4685.57	11471	10610.5	5691.89	14354	11408.1	annotated
9890071	623	Glutaminyl-Glutamine	C10H18N4O5	4685.57	11471	10610.5	5691.89	14354	11408.1	annotated
9890075	623	N2-Succinoylarginine	C10H18N4O5	4685.57	11471	10610.5	5691.89	14354	11408.1	annotated
9890076	623	N2-Succinyl-L-arginine	C10H18N4O5	4685.57	11471	10610.5	5691.89	14354	11408.1	annotated
9890077	624	N-Lignoceroylsphingosine	C42H83NO3	258566	202313	193309	434204	248411	255144	annotated
9890078	624	Cer(d18:1/24:0)	C42H83NO3	258566	202313	193309	434204	248411	255144	annotated
9890079	624	Cer(d18:0/24:1(15Z))	C42H83NO3	258566	202313	193309	434204	248411	255144	annotated
9890081	625	PE(20:2(11Z,14Z)/P-16:0)	C41H78NO7P	108940	73410.1	65500.7	77663	53620.6	53840.7	annotated
9890082	625	PE(18:1(9Z)/P-18:1(11Z))	C41H78NO7P	108940	73410.1	65500.7	77663	53620.6	53840.7	annotated
9890083	625	PE(18:1(9Z)/P-18:1(9Z))	C41H78NO7P	108940	73410.1	65500.7	77663	53620.6	53840.7	annotated
9890084	625	PE(18:1(11Z)/P-18:1(11Z))	C41H78NO7P	108940	73410.1	65500.7	77663	53620.6	53840.7	annotated
9890085	625	PE(18:1(11Z)/P-18:1(9Z))	C41H78NO7P	108940	73410.1	65500.7	77663	53620.6	53840.7	annotated
9890086	625	PE(18:2(9Z,12Z)/P-18:0)	C41H78NO7P	108940	73410.1	65500.7	77663	53620.6	53840.7	annotated
9890087	625	PE(P-18:0/18:2(9Z,12Z))	C41H78NO7P	108940	73410.1	65500.7	77663	53620.6	53840.7	annotated
9890088	625	PE(P-16:0/20:2(11Z,14Z))	C41H78NO7P	108940	73410.1	65500.7	77663	53620.6	53840.7	annotated
9890089	625	PE(P-18:1(11Z)/18:1(11Z))	C41H78NO7P	108940	73410.1	65500.7	77663	53620.6	53840.7	annotated
9890090	625	PE(P-18:1(11Z)/18:1(9Z))	C41H78NO7P	108940	73410.1	65500.7	77663	53620.6	53840.7	annotated
9890091	625	PE(P-18:1(9Z)/18:1(9Z))	C41H78NO7P	108940	73410.1	65500.7	77663	53620.6	53840.7	annotated
9890092	625	PE(P-18:1(9Z)/18:1(11Z))	C41H78NO7P	108940	73410.1	65500.7	77663	53620.6	53840.7	annotated
9890098	625	PC(P-16:0/17:2(9Z,12Z))	C41H78NO7P	108940	73410.1	65500.7	77663	53620.6	53840.7	annotated
9890099	625	PE(O-18:0/18:3(6Z,9Z,12Z))	C41H78NO7P	108940	73410.1	65500.7	77663	53620.6	53840.7	annotated
9890100	625	PE(O-18:0/18:3(9Z,12Z,15Z))	C41H78NO7P	108940	73410.1	65500.7	77663	53620.6	53840.7	annotated
9890101	625	PE(O-16:0/20:3(8Z,11Z,14Z))	C41H78NO7P	108940	73410.1	65500.7	77663	53620.6	53840.7	annotated
9890103	626	PE(20:2(11Z,14Z)/P-18:1(11Z))	C43H80NO7P	95103.7	92840.5	100755	87984.6	85578.2	62674.1	annotated
9890104	626	PE(20:2(11Z,14Z)/P-18:1(9Z))	C43H80NO7P	95103.7	92840.5	100755	87984.6	85578.2	62674.1	annotated
9890105	626	PE(20:3(5Z,8Z,11Z)/P-18:0)	C43H80NO7P	95103.7	92840.5	100755	87984.6	85578.2	62674.1	annotated
9890106	626	PE(20:3(8Z,11Z,14Z)/P-18:0)	C43H80NO7P	95103.7	92840.5	100755	87984.6	85578.2	62674.1	annotated
9890110	626	PE(P-18:0/20:3(5Z,8Z,11Z))	C43H80NO7P	95103.7	92840.5	100755	87984.6	85578.2	62674.1	annotated
9890111	626	PE(P-18:0/20:3(8Z,11Z,14Z))	C43H80NO7P	95103.7	92840.5	100755	87984.6	85578.2	62674.1	annotated
9890113	626	PE(P-18:1(11Z)/20:2(11Z,14Z))	C43H80NO7P	95103.7	92840.5	100755	87984.6	85578.2	62674.1	annotated
9890114	626	PE(P-18:1(9Z)/20:2(11Z,14Z))	C43H80NO7P	95103.7	92840.5	100755	87984.6	85578.2	62674.1	annotated
9890127	626	PC(O-15:0/20:4(5Z,8Z,11Z,14Z))	C43H80NO7P	95103.7	92840.5	100755	87984.6	85578.2	62674.1	annotated
9890128	626	PE(P-20:0/18:3(9Z,12Z,15Z))	C43H80NO7P	95103.7	92840.5	100755	87984.6	85578.2	62674.1	annotated
9890129	626	PE(P-20:0/18:3(6Z,9Z,12Z))	C43H80NO7P	95103.7	92840.5	100755	87984.6	85578.2	62674.1	annotated
9890134	626	PE(O-16:0/22:4(7Z,10Z,13Z,16Z))	C43H80NO7P	95103.7	92840.5	100755	87984.6	85578.2	62674.1	annotated
9890137	626	PE(O-20:0/18:4(6Z,9Z,12Z,15Z))	C43H80NO7P	95103.7	92840.5	100755	87984.6	85578.2	62674.1	annotated
9890138	626	PE(O-18:0/20:4(5Z,8Z,11Z,14Z))	C43H80NO7P	95103.7	92840.5	100755	87984.6	85578.2	62674.1	annotated
9890139	627	PE(14:1(9Z)/P-18:0)	C37H72NO7P	81961.7	74834.1	58302.4	71302.9	67862.9	49712.9	annotated
9890140	627	PE(14:0/P-18:1(11Z))	C37H72NO7P	81961.7	74834.1	58302.4	71302.9	67862.9	49712.9	annotated
9890141	627	PE(14:0/P-18:1(9Z))	C37H72NO7P	81961.7	74834.1	58302.4	71302.9	67862.9	49712.9	annotated
9890142	627	PE(16:1(9Z)/P-16:0)	C37H72NO7P	81961.7	74834.1	58302.4	71302.9	67862.9	49712.9	annotated
9890143	627	PE(P-18:0/14:1(9Z))	C37H72NO7P	81961.7	74834.1	58302.4	71302.9	67862.9	49712.9	annotated
9890144	627	PE(P-16:0/16:1(9Z))	C37H72NO7P	81961.7	74834.1	58302.4	71302.9	67862.9	49712.9	annotated
9890145	627	PE(P-18:1(11Z)/14:0)	C37H72NO7P	81961.7	74834.1	58302.4	71302.9	67862.9	49712.9	annotated
9890146	627	PE(P-18:1(9Z)/14:0)	C37H72NO7P	81961.7	74834.1	58302.4	71302.9	67862.9	49712.9	annotated
9890153	629	PE(24:1(15Z)/P-18:1(11Z))	C47H90NO7P	0	0	0	0	0	0	annotated
9890154	629	PE(24:1(15Z)/P-18:1(9Z))	C47H90NO7P	0	0	0	0	0	0	annotated
9890155	629	PE(P-18:1(11Z)/24:1(15Z))	C47H90NO7P	0	0	0	0	0	0	annotated
9890156	629	PE(P-18:1(9Z)/24:1(15Z))	C47H90NO7P	0	0	0	0	0	0	annotated
9890163	629	PE(P-20:0/22:2(13Z,16Z))	C47H90NO7P	0	0	0	0	0	0	annotated
9890169	630	Tranexamic acid	C8H15NO2	259520	442903	366464	150918	284326	194612	annotated
9890185	630	(S)-Homostachydrine	C8H15NO2	259520	442903	366464	150918	284326	194612	annotated
9890187	630	Homostachydrine	C8H15NO2	259520	442903	366464	150918	284326	194612	annotated
9890188	630	Lentiginosine	C8H15NO2	259520	442903	366464	150918	284326	194612	annotated
9890277	632	PC(20:3(8Z,11Z,14Z)/18:1(9Z))	C46H84NO8P	151559	245722	311854	158014	279434	265281	annotated
9890278	632	PC(20:3(8Z,11Z,14Z)/18:1(11Z))	C46H84NO8P	151559	245722	311854	158014	279434	265281	annotated
9890279	632	PC(20:2(11Z,14Z)/18:2(9Z,12Z))	C46H84NO8P	151559	245722	311854	158014	279434	265281	annotated
9890280	632	PC(20:1(11Z)/18:3(9Z,12Z,15Z))	C46H84NO8P	151559	245722	311854	158014	279434	265281	annotated
9890281	632	PC(20:1(11Z)/18:3(6Z,9Z,12Z))	C46H84NO8P	151559	245722	311854	158014	279434	265281	annotated
9890282	632	PC(20:3(5Z,8Z,11Z)/18:1(9Z))	C46H84NO8P	151559	245722	311854	158014	279434	265281	annotated
9890283	632	PC(20:3(5Z,8Z,11Z)/18:1(11Z))	C46H84NO8P	151559	245722	311854	158014	279434	265281	annotated
9890285	632	PC(20:4(5Z,8Z,11Z,14Z)/18:0)	C46H84NO8P	151559	245722	311854	158014	279434	265281	annotated
9890286	632	PC(20:4(8Z,11Z,14Z,17Z)/18:0)	C46H84NO8P	151559	245722	311854	158014	279434	265281	annotated
9890287	632	PC(22:4(7Z,10Z,13Z,16Z)/16:0)	C46H84NO8P	151559	245722	311854	158014	279434	265281	annotated
9890290	632	PC(18:0/20:4(8Z,11Z,14Z,17Z))	C46H84NO8P	151559	245722	311854	158014	279434	265281	annotated
9890291	632	PC(18:0/20:4(5Z,8Z,11Z,14Z))	C46H84NO8P	151559	245722	311854	158014	279434	265281	annotated
9890294	632	PC(18:1(11Z)/20:3(8Z,11Z,14Z))	C46H84NO8P	151559	245722	311854	158014	279434	265281	annotated
9890295	632	PC(18:1(11Z)/20:3(5Z,8Z,11Z))	C46H84NO8P	151559	245722	311854	158014	279434	265281	annotated
9890297	632	PC(18:1(9Z)/20:3(8Z,11Z,14Z))	C46H84NO8P	151559	245722	311854	158014	279434	265281	annotated
9890298	632	PC(18:1(9Z)/20:3(5Z,8Z,11Z))	C46H84NO8P	151559	245722	311854	158014	279434	265281	annotated
9890300	632	PC(18:3(6Z,9Z,12Z)/20:1(11Z))	C46H84NO8P	151559	245722	311854	158014	279434	265281	annotated
9890301	632	PC(18:2(9Z,12Z)/20:2(11Z,14Z))	C46H84NO8P	151559	245722	311854	158014	279434	265281	annotated
9890302	632	PC(18:3(9Z,12Z,15Z)/20:1(11Z))	C46H84NO8P	151559	245722	311854	158014	279434	265281	annotated
9890303	632	PC(18:4(6Z,9Z,12Z,15Z)/20:0)	C46H84NO8P	151559	245722	311854	158014	279434	265281	annotated
9890305	632	PC(20:0/18:4(6Z,9Z,12Z,15Z))	C46H84NO8P	151559	245722	311854	158014	279434	265281	annotated
9890308	632	PC(16:0/22:4(7Z,10Z,13Z,16Z))	C46H84NO8P	151559	245722	311854	158014	279434	265281	annotated
9890322	632	PE(22:4(7Z,10Z,13Z,16Z)/19:0)	C46H84NO8P	151559	245722	311854	158014	279434	265281	annotated
9890324	632	PE(21:0/20:4(5Z,8Z,11Z,14Z))	C46H84NO8P	151559	245722	311854	158014	279434	265281	annotated
9890326	632	PC(18:0/20:4(8Z,10Z,12Z,14Z))	C46H84NO8P	151559	245722	311854	158014	279434	265281	annotated
9890339	632	PE(19:0/22:4(7Z,10Z,13Z,16Z))	C46H84NO8P	151559	245722	311854	158014	279434	265281	annotated
9890349	632	PE(20:4(5Z,8Z,11Z,14Z)/21:0)	C46H84NO8P	151559	245722	311854	158014	279434	265281	annotated
9890351	633	PC(20:3(8Z,11Z,14Z)/18:2(9Z,12Z))	C46H82NO8P	277941	514256	601664	307080	421359	431587	annotated
9890352	633	PC(20:2(11Z,14Z)/18:3(9Z,12Z,15Z))	C46H82NO8P	277941	514256	601664	307080	421359	431587	annotated
9890353	633	PC(20:2(11Z,14Z)/18:3(6Z,9Z,12Z))	C46H82NO8P	277941	514256	601664	307080	421359	431587	annotated
9890355	633	PC(20:1(11Z)/18:4(6Z,9Z,12Z,15Z))	C46H82NO8P	277941	514256	601664	307080	421359	431587	annotated
9890356	633	PC(20:3(5Z,8Z,11Z)/18:2(9Z,12Z))	C46H82NO8P	277941	514256	601664	307080	421359	431587	annotated
9890357	633	PC(20:4(5Z,8Z,11Z,14Z)/18:1(9Z))	C46H82NO8P	277941	514256	601664	307080	421359	431587	annotated
9890358	633	PC(20:4(5Z,8Z,11Z,14Z)/18:1(11Z))	C46H82NO8P	277941	514256	601664	307080	421359	431587	annotated
9890359	633	PC(20:5(5Z,8Z,11Z,14Z,17Z)/18:0)	C46H82NO8P	277941	514256	601664	307080	421359	431587	annotated
9890360	633	PC(20:4(8Z,11Z,14Z,17Z)/18:1(9Z))	C46H82NO8P	277941	514256	601664	307080	421359	431587	annotated
9890361	633	PC(20:4(8Z,11Z,14Z,17Z)/18:1(11Z))	C46H82NO8P	277941	514256	601664	307080	421359	431587	annotated
9890362	633	PC(22:5(4Z,7Z,10Z,13Z,16Z)/16:0)	C46H82NO8P	277941	514256	601664	307080	421359	431587	annotated
9890363	633	PC(22:4(7Z,10Z,13Z,16Z)/16:1(9Z))	C46H82NO8P	277941	514256	601664	307080	421359	431587	annotated
9890366	633	PC(22:5(7Z,10Z,13Z,16Z,19Z)/16:0)	C46H82NO8P	277941	514256	601664	307080	421359	431587	annotated
9890368	633	PC(18:0/20:5(5Z,8Z,11Z,14Z,17Z))	C46H82NO8P	277941	514256	601664	307080	421359	431587	annotated
9890370	633	PC(16:1(9Z)/22:4(7Z,10Z,13Z,16Z))	C46H82NO8P	277941	514256	601664	307080	421359	431587	annotated
9890371	633	PC(18:1(11Z)/20:4(8Z,11Z,14Z,17Z))	C46H82NO8P	277941	514256	601664	307080	421359	431587	annotated
9890372	633	PC(18:1(11Z)/20:4(5Z,8Z,11Z,14Z))	C46H82NO8P	277941	514256	601664	307080	421359	431587	annotated
9890375	633	PC(18:2(9Z,12Z)/20:3(5Z,8Z,11Z))	C46H82NO8P	277941	514256	601664	307080	421359	431587	annotated
9890377	633	PC(18:1(9Z)/20:4(8Z,11Z,14Z,17Z))	C46H82NO8P	277941	514256	601664	307080	421359	431587	annotated
9890378	633	PC(18:1(9Z)/20:4(5Z,8Z,11Z,14Z))	C46H82NO8P	277941	514256	601664	307080	421359	431587	annotated
9890380	633	PC(18:3(6Z,9Z,12Z)/20:2(11Z,14Z))	C46H82NO8P	277941	514256	601664	307080	421359	431587	annotated
9890381	633	PC(18:2(9Z,12Z)/20:3(8Z,11Z,14Z))	C46H82NO8P	277941	514256	601664	307080	421359	431587	annotated
9890382	633	PC(18:3(9Z,12Z,15Z)/20:2(11Z,14Z))	C46H82NO8P	277941	514256	601664	307080	421359	431587	annotated
9890383	633	PC(18:4(6Z,9Z,12Z,15Z)/20:1(11Z))	C46H82NO8P	277941	514256	601664	307080	421359	431587	annotated
9890387	633	PC(16:0/22:5(7Z,10Z,13Z,16Z,19Z))	C46H82NO8P	277941	514256	601664	307080	421359	431587	annotated
9890388	633	PC(16:0/22:5(4Z,7Z,10Z,13Z,16Z))	C46H82NO8P	277941	514256	601664	307080	421359	431587	annotated
9890406	633	PE(22:4(7Z,10Z,13Z,16Z)/19:1(9Z))	C46H82NO8P	277941	514256	601664	307080	421359	431587	annotated
9890409	633	PE(21:0/20:5(5Z,8Z,11Z,14Z,17Z))	C46H82NO8P	277941	514256	601664	307080	421359	431587	annotated
9890412	633	PC(18:0/20:5(9Z,11Z,13Z,15Z,17Z))	C46H82NO8P	277941	514256	601664	307080	421359	431587	annotated
9890444	633	PE(19:1(9Z)/22:4(7Z,10Z,13Z,16Z))	C46H82NO8P	277941	514256	601664	307080	421359	431587	annotated
9890447	633	PE(20:5(5Z,8Z,11Z,14Z,17Z)/21:0)	C46H82NO8P	277941	514256	601664	307080	421359	431587	annotated
9890470	635	dGDP	C10H15N5O10P2	430660	421436	380549	450977	218618	229936	annotated+fragment
9890471	635	Adenosine 3',5'-bisphosphate	C10H15N5O10P2	430660	421436	380549	450977	218618	229936	annotated+fragment
9890473	635	ADP	C10H15N5O10P2	430660	421436	380549	450977	218618	229936	annotated+fragment
9890477	637	PE(20:0/14:0)	C39H78NO8P	235706	297713	264485	295452	257022	214881	annotated
9890478	637	PE-NMe2(16:0/16:0)	C39H78NO8P	235706	297713	264485	295452	257022	214881	annotated
9890479	637	PE(14:0/20:0)	C39H78NO8P	235706	297713	264485	295452	257022	214881	annotated
9890480	637	PE(16:0/18:0)	C39H78NO8P	235706	297713	264485	295452	257022	214881	annotated
9890481	637	PE(18:0/16:0)	C39H78NO8P	235706	297713	264485	295452	257022	214881	annotated
9890486	637	PC(16:0/15:0)	C39H78NO8P	235706	297713	264485	295452	257022	214881	annotated
9890487	637	PC(15:0/16:0)	C39H78NO8P	235706	297713	264485	295452	257022	214881	annotated
9890493	637	PE(22:0/12:0)	C39H78NO8P	235706	297713	264485	295452	257022	214881	annotated
9890494	637	PE(21:0/13:0)	C39H78NO8P	235706	297713	264485	295452	257022	214881	annotated
9890495	637	PE(19:0/15:0)	C39H78NO8P	235706	297713	264485	295452	257022	214881	annotated
9890496	637	PE(17:0/17:0)	C39H78NO8P	235706	297713	264485	295452	257022	214881	annotated
9890497	637	PE(15:0/19:0)	C39H78NO8P	235706	297713	264485	295452	257022	214881	annotated
9890498	637	PE(13:0/21:0)	C39H78NO8P	235706	297713	264485	295452	257022	214881	annotated
9890499	637	PE(12:0/22:0)	C39H78NO8P	235706	297713	264485	295452	257022	214881	annotated
9890500	637	PC(19:0/12:0)	C39H78NO8P	235706	297713	264485	295452	257022	214881	annotated
9890501	637	PC(20:0/11:0)	C39H78NO8P	235706	297713	264485	295452	257022	214881	annotated
9890502	637	PC(11:0/20:0)	C39H78NO8P	235706	297713	264485	295452	257022	214881	annotated
9890503	637	PC(10:0/21:0)	C39H78NO8P	235706	297713	264485	295452	257022	214881	annotated
9890504	637	PC(12:0/19:0)	C39H78NO8P	235706	297713	264485	295452	257022	214881	annotated
9890505	637	PC(14:0/17:0)	C39H78NO8P	235706	297713	264485	295452	257022	214881	annotated
9890506	637	PC(13:0/18:0)	C39H78NO8P	235706	297713	264485	295452	257022	214881	annotated
9890507	637	PC(9:0/22:0)	C39H78NO8P	235706	297713	264485	295452	257022	214881	annotated
9890508	637	PC(18:0/13:0)	C39H78NO8P	235706	297713	264485	295452	257022	214881	annotated
9890509	637	PC(17:0/14:0)	C39H78NO8P	235706	297713	264485	295452	257022	214881	annotated
9890510	637	PC(21:0/10:0)	C39H78NO8P	235706	297713	264485	295452	257022	214881	annotated
9890564	640	Phytosphingosine	C18H39NO3	8318.28	17055.1	22543.4	8733.46	6815.68	11570.2	annotated
9890573	646	PE(22:5(7Z,10Z,13Z,16Z,19Z)/P-16:0)	C43H76NO7P	45158.7	63619.2	74792.1	54129.8	81618.7	74586.4	annotated
9890574	646	PE(22:5(4Z,7Z,10Z,13Z,16Z)/P-16:0)	C43H76NO7P	45158.7	63619.2	74792.1	54129.8	81618.7	74586.4	annotated
9890575	646	PE(20:4(8Z,11Z,14Z,17Z)/P-18:1(11Z))	C43H76NO7P	45158.7	63619.2	74792.1	54129.8	81618.7	74586.4	annotated
9890576	646	PE(20:4(8Z,11Z,14Z,17Z)/P-18:1(9Z))	C43H76NO7P	45158.7	63619.2	74792.1	54129.8	81618.7	74586.4	annotated
9890577	646	PE(20:4(5Z,8Z,11Z,14Z)/P-18:1(11Z))	C43H76NO7P	45158.7	63619.2	74792.1	54129.8	81618.7	74586.4	annotated
9890578	646	PE(20:4(5Z,8Z,11Z,14Z)/P-18:1(9Z))	C43H76NO7P	45158.7	63619.2	74792.1	54129.8	81618.7	74586.4	annotated
9890579	646	PE(20:5(5Z,8Z,11Z,14Z,17Z)/P-18:0)	C43H76NO7P	45158.7	63619.2	74792.1	54129.8	81618.7	74586.4	annotated
9890580	646	PE(P-16:0/22:5(4Z,7Z,10Z,13Z,16Z))	C43H76NO7P	45158.7	63619.2	74792.1	54129.8	81618.7	74586.4	annotated
9890581	646	PE(P-16:0/22:5(7Z,10Z,13Z,16Z,19Z))	C43H76NO7P	45158.7	63619.2	74792.1	54129.8	81618.7	74586.4	annotated
9890582	646	PE(P-18:0/20:5(5Z,8Z,11Z,14Z,17Z))	C43H76NO7P	45158.7	63619.2	74792.1	54129.8	81618.7	74586.4	annotated
9890583	646	PE(P-18:1(11Z)/20:4(5Z,8Z,11Z,14Z))	C43H76NO7P	45158.7	63619.2	74792.1	54129.8	81618.7	74586.4	annotated
9890584	646	PE(P-18:1(11Z)/20:4(8Z,11Z,14Z,17Z))	C43H76NO7P	45158.7	63619.2	74792.1	54129.8	81618.7	74586.4	annotated
9890585	646	PE(P-18:1(9Z)/20:4(8Z,11Z,14Z,17Z))	C43H76NO7P	45158.7	63619.2	74792.1	54129.8	81618.7	74586.4	annotated
9890586	646	PE(P-18:1(9Z)/20:4(5Z,8Z,11Z,14Z))	C43H76NO7P	45158.7	63619.2	74792.1	54129.8	81618.7	74586.4	annotated
9890591	646	PE(O-16:0/22:6(4Z,7Z,10Z,13Z,16Z,19Z))	C43H76NO7P	45158.7	63619.2	74792.1	54129.8	81618.7	74586.4	annotated
9890656	654	Glucosamine 6-sulfate	C6H13NO8S	147683	148727	152210	123250	146009	140055	annotated
9890657	654	N-Sulfo-D-glucosamine	C6H13NO8S	147683	148727	152210	123250	146009	140055	annotated
9890658	654	N-Sulfo-D-glucosamine	C6H13NO8S	147683	148727	152210	123250	146009	140055	annotated
9890663	661	Aplysinal	C15H17BrO2	9259.54	28336.2	27451.2	7669.48	20003.6	17276.4	annotated
9890679	676	N-(L-Arginino)succinate	C10H18N4O6	79181.3	293347	235651	80914.6	525807	461908	annotated+fragment
9890680	676	N2-(3-Carboxy-2-hydroxy-1-oxopropyl)arginine	C10H18N4O6	79181.3	293347	235651	80914.6	525807	461908	annotated+fragment
9890681	676	N2-(3-Hydroxysuccinoyl)arginine	C10H18N4O6	79181.3	293347	235651	80914.6	525807	461908	annotated+fragment
9890847	703	2'-Hydroxybiphenyl-2-sulfinate	C12H10O3S	4066.7	6972.74	8979.85	3177.49	2356.46	4693.36	annotated
9890850	706	Deoxyadenosine	C10H13N5O3	4499.16	0	4015.21	0	0	0	identified
9890851	706	5'-Deoxyadenosine	C10H13N5O3	4499.16	0	4015.21	0	0	0	annotated
9890854	706	Cordycepin	C10H13N5O3	4499.16	0	4015.21	0	0	0	annotated
9890857	708	PE(20:3(5Z,8Z,11Z)/P-18:1(11Z))	C43H78NO7P	281528	307006	267208	242843	328467	249050	annotated
9890858	708	PE(20:3(5Z,8Z,11Z)/P-18:1(9Z))	C43H78NO7P	281528	307006	267208	242843	328467	249050	annotated
9890859	708	PE(20:3(8Z,11Z,14Z)/P-18:1(11Z))	C43H78NO7P	281528	307006	267208	242843	328467	249050	annotated
9890860	708	PE(20:3(8Z,11Z,14Z)/P-18:1(9Z))	C43H78NO7P	281528	307006	267208	242843	328467	249050	annotated
9890861	708	PE(20:4(8Z,11Z,14Z,17Z)/P-18:0)	C43H78NO7P	281528	307006	267208	242843	328467	249050	annotated
9890862	708	PE(20:4(5Z,8Z,11Z,14Z)/P-18:0)	C43H78NO7P	281528	307006	267208	242843	328467	249050	annotated
9890863	708	PE(22:4(7Z,10Z,13Z,16Z)/P-16:0)	C43H78NO7P	281528	307006	267208	242843	328467	249050	annotated
9890864	708	PE(P-16:0/22:4(7Z,10Z,13Z,16Z))	C43H78NO7P	281528	307006	267208	242843	328467	249050	annotated
9890865	708	PE(P-18:0/20:4(8Z,11Z,14Z,17Z))	C43H78NO7P	281528	307006	267208	242843	328467	249050	annotated
9890866	708	PE(P-18:1(11Z)/20:3(5Z,8Z,11Z))	C43H78NO7P	281528	307006	267208	242843	328467	249050	annotated
9890867	708	PE(P-18:1(11Z)/20:3(8Z,11Z,14Z))	C43H78NO7P	281528	307006	267208	242843	328467	249050	annotated
9890868	708	PE(P-18:1(9Z)/20:3(5Z,8Z,11Z))	C43H78NO7P	281528	307006	267208	242843	328467	249050	annotated
9890869	708	PE(O-18:1(1Z)/20:4(5Z,8Z,11Z,14Z))	C43H78NO7P	281528	307006	267208	242843	328467	249050	annotated
9890876	708	PE(P-20:0/18:4(6Z,9Z,12Z,15Z))	C43H78NO7P	281528	307006	267208	242843	328467	249050	annotated
9890877	708	PE(O-18:0/20:5(5Z,8Z,11Z,14Z,17Z))	C43H78NO7P	281528	307006	267208	242843	328467	249050	annotated
9890878	708	PE(O-16:0/22:5(7Z,10Z,13Z,16Z,19Z))	C43H78NO7P	281528	307006	267208	242843	328467	249050	annotated
9890879	708	PE(O-16:0/22:5(4Z,7Z,10Z,13Z,16Z))	C43H78NO7P	281528	307006	267208	242843	328467	249050	annotated
9890882	709	PE(O-20:0/22:6(4Z,7Z,10Z,13Z,16Z,19Z))	C47H84NO7P	14878.4	13246.8	18178.4	9551.37	17126.3	21061.1	annotated
9890886	710	Halaminol A	C14H29NO	102491	283888	106310	30398	72509.2	117711	annotated
9890889	711	Oleamide	C18H35NO	21333.2	31984.5	18978.8	16376	17614	30747.4	annotated
9890890	711	Dodemorph	C18H35NO	21333.2	31984.5	18978.8	16376	17614	30747.4	annotated
9890901	711	Elaidamide	C18H35NO	21333.2	31984.5	18978.8	16376	17614	30747.4	annotated
9890923	718	PE(15:0/P-18:0)	C38H76NO7P	188283	153516	160442	180647	128926	141047	annotated
9890924	718	PC(P-16:0/14:0)	C38H76NO7P	188283	153516	160442	180647	128926	141047	annotated
9890925	718	PE(P-18:0/15:0)	C38H76NO7P	188283	153516	160442	180647	128926	141047	annotated
9890926	718	PC(O-16:0/14:1(9Z))	C38H76NO7P	188283	153516	160442	180647	128926	141047	annotated
9890927	718	PC(o-14:0/16:1(9Z))	C38H76NO7P	188283	153516	160442	180647	128926	141047	annotated
9890928	718	PC(14:0/P-16:0)	C38H76NO7P	188283	153516	160442	180647	128926	141047	annotated
9890932	718	PE(P-16:0/17:0)	C38H76NO7P	188283	153516	160442	180647	128926	141047	annotated
9890933	718	PE(P-20:0/13:0)	C38H76NO7P	188283	153516	160442	180647	128926	141047	annotated
9890934	718	PC(P-18:0/12:0)	C38H76NO7P	188283	153516	160442	180647	128926	141047	annotated
9890936	718	PE(O-18:0/15:1(9Z))	C38H76NO7P	188283	153516	160442	180647	128926	141047	annotated
9890937	718	PE(O-16:0/17:1(9Z))	C38H76NO7P	188283	153516	160442	180647	128926	141047	annotated
9890938	719	SM(d18:0/24:1(15Z))	C47H95N2O6P	131538	129902	138060	144238	101955	113335	annotated
9890939	719	SM(d18:1/24:0)	C47H95N2O6P	131538	129902	138060	144238	101955	113335	annotated
9890940	722	Oleanolic aldehyde	C30H48O2	96097.3	87691.2	98392.2	106123	89759.9	89767.5	annotated
9890941	722	Soyasapogenol C	C30H48O2	96097.3	87691.2	98392.2	106123	89759.9	89767.5	annotated
9890942	722	3beta-3-Hydroxy-18-lupen-21-one	C30H48O2	96097.3	87691.2	98392.2	106123	89759.9	89767.5	annotated
9890943	722	Ganoderol B	C30H48O2	96097.3	87691.2	98392.2	106123	89759.9	89767.5	annotated
9890944	722	4,4-Dimethyl-14a-formyl-5a-cholesta-8,24-dien-3b-ol	C30H48O2	96097.3	87691.2	98392.2	106123	89759.9	89767.5	annotated
9890945	722	Rofficerone	C30H48O2	96097.3	87691.2	98392.2	106123	89759.9	89767.5	annotated
9890946	722	3beta-Hydroxy-22(30)-hopen-29-al	C30H48O2	96097.3	87691.2	98392.2	106123	89759.9	89767.5	annotated
9890947	722	Sebiferic acid	C30H48O2	96097.3	87691.2	98392.2	106123	89759.9	89767.5	annotated
9890948	722	Myricolal	C30H48O2	96097.3	87691.2	98392.2	106123	89759.9	89767.5	annotated
9890949	722	32-oxolanosterol	C30H48O2	96097.3	87691.2	98392.2	106123	89759.9	89767.5	annotated
9890950	722	28-Hydroxy-14-taraxeren-3-one	C30H48O2	96097.3	87691.2	98392.2	106123	89759.9	89767.5	annotated
9890951	722	11-Oxo-beta-amyrin	C30H48O2	96097.3	87691.2	98392.2	106123	89759.9	89767.5	annotated
9890952	722	Karounidiol	C30H48O2	96097.3	87691.2	98392.2	106123	89759.9	89767.5	annotated
9890953	722	Soyasapogenol C	C30H48O2	96097.3	87691.2	98392.2	106123	89759.9	89767.5	annotated
[truncated: 4,910 more rows]
